# Supplementary material for: Risk of heart disease following treatment for breast cancer – results from a population-based cohort study
Source: eLife. 2022 Mar 16;11:e71562. doi: 10.7554/eLife.71562 (PMC8940173; doi:10.7554/eLife.71562)
Supplement: Figure 1—source data 1. [file elife-71562-fig1-data1.xlsx]

## Sheet: Arrhythmia
time(year)	hr	hr_lci	hr_uci
6.14117	1.03931	0.892755	1.20993
16.6192	1.53508	1.22054	1.93069
16.1236	1.52253	1.21939	1.90103
16.945	1.54267	1.221	1.9491
10.7464	1.29397	1.14538	1.46182
16.0306	1.52003	1.21911	1.89523
16.9094	1.54187	1.22096	1.94713
16.2523	1.52591	1.21974	1.90892
16.0223	1.51981	1.21908	1.89472
16.6055	1.53475	1.22051	1.9299
16.1373	1.52289	1.21943	1.90187
16.1127	1.52224	1.21936	1.90035
16.6986	1.53698	1.22067	1.93526
16.6493	1.53581	1.22059	1.93243
16.3701	1.52892	1.22003	1.91603
16.9861	1.5436	1.22104	1.95136
16.789	1.5391	1.22081	1.94039
16.8985	1.54162	1.22095	1.94652
16.0661	1.52099	1.21922	1.89746
16.8738	1.54106	1.22092	1.94515
16.1209	1.52245	1.21938	1.90086
16.1017	1.52194	1.21932	1.89967
16.2441	1.52569	1.21972	1.90842
16.4933	1.53201	1.2203	1.92334
16.6028	1.53469	1.22051	1.92974
16.0689	1.52106	1.21923	1.89763
5.20753	1.05169	0.906586	1.22002
16.8519	1.54056	1.22089	1.94393
13.2023	1.42206	1.19855	1.68725
16.5672	1.53382	1.22044	1.92767
10.1248	1.25157	1.11953	1.39918
16.1291	1.52267	1.2194	1.90137
13.1284	1.41887	1.1976	1.68102
16.5453	1.53329	1.2204	1.92639
16.8547	1.54062	1.22089	1.94408
16.9259	1.54224	1.22098	1.94804
16.7917	1.53917	1.22081	1.94055
16.2578	1.52605	1.21975	1.90926
16.4549	1.53106	1.22022	1.92108
15.0668	1.49157	1.21494	1.8312
16.7725	1.53872	1.22078	1.93946
16.2605	1.52612	1.21976	1.90942
16.9122	1.54193	1.22096	1.94728
16.4823	1.53174	1.22027	1.9227
16.4878	1.53187	1.22029	1.92302
9.695	1.21924	1.09604	1.35629
16.1182	1.52238	1.21937	1.90069
16.4851	1.53181	1.22028	1.92286
2.18213	1.29855	1.13333	1.48786
8.11521	1.10659	0.983555	1.24503
11.1269	1.31749	1.15774	1.49928
16.1428	1.52304	1.21944	1.90221
16.6548	1.53594	1.2206	1.93274
10.4616	1.27517	1.13454	1.43323
16.1592	1.52347	1.21949	1.90322
16.0634	1.52092	1.21921	1.89729
1.13076	1.49478	1.24087	1.80063
4.24926	1.10271	0.968548	1.25546
13.1749	1.42088	1.1982	1.68495
16.8492	1.5405	1.22089	1.94378
16.0442	1.5204	1.21915	1.89609
8.60804	1.1368	1.01843	1.26893
16.0853	1.52151	1.21928	1.89865
12.4055	1.38582	1.18678	1.61823
16.778	1.53885	1.22079	1.93977
16.9067	1.54181	1.22096	1.94698
2.89125	1.21365	1.07456	1.37073
11.1187	1.317	1.1575	1.49848
10.6232	1.28596	1.14088	1.44949
16.8465	1.54043	1.22088	1.94362
12.7067	1.40003	1.19167	1.64482
16.099	1.52187	1.21932	1.8995
16.5891	1.53435	1.22048	1.92895
16.6658	1.5362	1.22062	1.93337
16.6247	1.53522	1.22055	1.93101
14.5795	1.47531	1.21184	1.79606
16.7342	1.53782	1.22073	1.93729
16.0278	1.51996	1.2191	1.89506
16.2797	1.52661	1.21981	1.91058
14.7328	1.48057	1.21289	1.80731
16.2167	1.52498	1.21965	1.90675
2.94875	1.20771	1.06984	1.36334
12.0359	1.36747	1.17992	1.58482
16.0059	1.51936	1.21903	1.89369
16.6083	1.53482	1.22052	1.93006
16.5261	1.53282	1.22036	1.92527
4.77494	1.0727	0.933036	1.23327
8.56149	1.13373	1.01505	1.26629
16.3153	1.52753	1.2199	1.91274
16.8684	1.54094	1.22091	1.94485
2.39842	1.27004	1.11514	1.44646
16.2742	1.52647	1.2198	1.91025
0.13142	2.05247	1.46564	2.87428
16.1045	1.52202	1.21933	1.89984
16.2961	1.52704	1.21985	1.91158
16.507	1.53235	1.22033	1.92415
16.0908	1.52165	1.21929	1.89899
5.24587	1.05019	0.904682	1.2191
4.55865	1.08443	0.947256	1.24147
5.65655	1.03998	0.892167	1.21228
12.2604	1.37874	1.18421	1.60522
10.6149	1.28542	1.14057	1.44867
14.4562	1.47099	1.21094	1.78689
16.5042	1.53228	1.22032	1.92399
16.0415	1.52033	1.21914	1.89592
9.61833	1.21321	1.09124	1.34882
16.3892	1.52941	1.22007	1.91717
16.7944	1.53923	1.22081	1.9407
16.7506	1.53821	1.22075	1.93822
12.2796	1.37968	1.18456	1.60694
14.9573	1.48803	1.2143	1.82346
16.277	1.52654	1.2198	1.91042
9.84011	1.23043	1.10459	1.37062
16.663	1.53613	1.22061	1.93322
14.4179	1.46963	1.21065	1.78402
16.8081	1.53955	1.22083	1.94147
7.28014	1.067	0.932689	1.22066
16.1839	1.52412	1.21956	1.90474
15.5733	1.50713	1.21743	1.86577
8.63542	1.13862	1.02042	1.27052
16.3728	1.52899	1.22004	1.91619
16.8903	1.54144	1.22094	1.94607
2.68864	1.23557	1.09119	1.39905
16.8163	1.53974	1.22084	1.94193
7.79214	1.08951	0.962311	1.23352
8.84898	1.1534	1.03611	1.28397
4.03844	1.11634	0.983707	1.26685
5.54978	1.04167	0.894126	1.21357
13.7964	1.4464	1.20521	1.73588
16.5836	1.53422	1.22047	1.92863
12.9997	1.41325	1.19589	1.6701
16.5781	1.53409	1.22046	1.92831
10.4863	1.27684	1.13554	1.43571
16.392	1.52948	1.22008	1.91734
16.2359	1.52548	1.2197	1.90792
16.1811	1.52405	1.21955	1.90457
16.8957	1.54156	1.22094	1.94637
16.1264	1.5226	1.2194	1.9012
16.5124	1.53248	1.22034	1.92447
15.2256	1.4966	1.2158	1.84225
16.6356	1.53548	1.22057	1.93164
16.3126	1.52746	1.21989	1.91257
15.5186	1.50551	1.2172	1.86213
2.664	1.23835	1.09321	1.40274
12.6492	1.39736	1.19078	1.63979
16.7397	1.53795	1.22073	1.9376
9.74154	1.22286	1.09885	1.36086
7.55394	1.07833	0.94783	1.22679
16.7999	1.53936	1.22082	1.94101
16.1401	1.52296	1.21944	1.90204
6.47793	1.04396	0.90003	1.2109
3.54561	1.15275	1.02119	1.30126
9.3993	1.19556	1.07636	1.32795
9.60191	1.21191	1.09018	1.34723
11.0393	1.31223	1.15509	1.49076
4.19176	1.10633	0.97263	1.2584
2.39568	1.27038	1.11536	1.44695
16.5617	1.53369	1.22043	1.92735
16.8382	1.54024	1.22087	1.94316
16.1072	1.52209	1.21934	1.90001
11.8744	1.35911	1.17658	1.56996
15.0832	1.4921	1.21503	1.83235
11.5431	1.3413	1.16899	1.53901
9.71964	1.22116	1.09754	1.35871
16.7013	1.53705	1.22067	1.93541
16.162	1.52354	1.2195	1.90339
16.1455	1.52311	1.21945	1.90238
15.3077	1.49914	1.21621	1.84789
16.1757	1.5239	1.21954	1.90424
16.5508	1.53342	1.22041	1.92671
16.2386	1.52555	1.2197	1.90809
5.67024	1.03981	0.891976	1.21214
9.65393	1.21602	1.09349	1.35228
16.7369	1.53789	1.22073	1.93744
16.2551	1.52598	1.21975	1.90909
16.5864	1.53429	1.22048	1.92879
2.16022	1.30159	1.1352	1.49237
7.62786	1.08167	0.952203	1.22873
16.9806	1.54347	1.22103	1.95106
16.3345	1.52802	1.21995	1.91389
9.20764	1.18026	1.06252	1.31104
16.3536	1.52851	1.21999	1.91504
7.10492	1.06064	0.923961	1.21754
8.93933	1.15994	1.04278	1.29025
16.0607	1.52084	1.2192	1.89712
15.5131	1.50535	1.21717	1.86176
16.3755	1.52906	1.22004	1.91636
16.1565	1.5234	1.21948	1.90306
16.4741	1.53153	1.22026	1.92221
3.23623	1.17967	1.04617	1.33021
10.1769	1.25531	1.12203	1.40443
16.0333	1.52011	1.21912	1.8954
12.6985	1.39965	1.19154	1.6441
10.385	1.26993	1.13135	1.42548
5.91118	1.0383	0.890689	1.21038
12.975	1.41216	1.19556	1.668
6.24795	1.04043	0.894585	1.21005
16.7315	1.53776	1.22072	1.93713
16.5425	1.53322	1.2204	1.92623
2.35188	1.27595	1.11902	1.4549
16.5398	1.53315	1.22039	1.92607
16.5316	1.53295	1.22037	1.92559
7.4718	1.07476	0.943108	1.22478
16.548	1.53335	1.22041	1.92655
16.6603	1.53607	1.22061	1.93306
16.5809	1.53416	1.22047	1.92847
10.8641	1.30144	1.14945	1.47352
16.6959	1.53692	1.22067	1.9351
16.11	1.52216	1.21935	1.90018
8.7641	1.14741	1.02985	1.2784
10.4479	1.27424	1.13398	1.43184
16.5097	1.53241	1.22033	1.92431
9.27062	1.18522	1.0671	1.31641
16.6931	1.53685	1.22066	1.93494
7.27741	1.0669	0.932547	1.2206
6.20688	1.03996	0.893826	1.20998
2.65579	1.23928	1.09389	1.40399
4.84339	1.06915	0.928649	1.23091
7.60048	1.08042	0.95057	1.228
13.5993	1.43857	1.20317	1.72002
7.24455	1.06565	0.930852	1.21997
8.93111	1.15934	1.04218	1.28966
12.7286	1.40103	1.192	1.64673
14.6424	1.47748	1.21228	1.8007
13.0654	1.41613	1.19678	1.67569
14.9107	1.4865	1.21402	1.82014
14.5466	1.47417	1.2116	1.79363
16.9642	1.54311	1.22102	1.95016
7.86332	1.09309	0.966846	1.23581
1.08969	1.50563	1.24649	1.81864
3.12945	1.18978	1.05498	1.34181
16.2715	1.5264	1.21979	1.91009
13.832	1.4478	1.20556	1.73871
14.2646	1.46411	1.20944	1.77241
15.1079	1.49288	1.21517	1.83407
16.904	1.54175	1.22095	1.94683
11.9428	1.36268	1.17803	1.57627
14.2783	1.46461	1.20955	1.77345
12.2221	1.37684	1.1835	1.60176
12.3946	1.38529	1.18659	1.61726
10.8258	1.29902	1.14815	1.46972
7.20348	1.06413	0.928773	1.21922
16.674	1.5364	1.22063	1.93385
3.30194	1.17365	1.04077	1.32349
15.2639	1.49779	1.21599	1.84489
5.17194	1.05318	0.908478	1.22092
15.19	1.49548	1.21561	1.83979
16.0251	1.51988	1.21909	1.89489
16.9724	1.54329	1.22103	1.95061
13.9881	1.45381	1.20704	1.75102
14.9765	1.48865	1.21442	1.82482
14.4973	1.47244	1.21124	1.78996
15.1051	1.4928	1.21515	1.83388
1.30599	1.45226	1.21874	1.73053
9.19395	1.17919	1.06152	1.3099
16.8711	1.541	1.22091	1.945
16.203	1.52462	1.21961	1.90591
16.6411	1.53561	1.22057	1.93196
13.8731	1.44939	1.20596	1.74197
16.4358	1.53058	1.22018	1.91994
16.5699	1.53389	1.22045	1.92783
16.047	1.52048	1.21916	1.89626
1.62359	1.38742	1.18429	1.62539
8.99135	1.16377	1.04663	1.29403
16.2633	1.52619	1.21977	1.90959
4.14522	1.10931	0.975963	1.26087
16.1483	1.52318	1.21946	1.90255
15.7513	1.51228	1.21815	1.87743
7.01183	1.05755	0.919657	1.21612
14.8204	1.48351	1.21346	1.81366
16.3974	1.52962	1.22009	1.91766
16.9423	1.54261	1.22099	1.94895
8.44924	1.12652	1.00696	1.26028
16.6767	1.53646	1.22063	1.934
16.3208	1.52767	1.21991	1.91307
16.2934	1.52697	1.21984	1.91141
2.19855	1.29629	1.13193	1.48451
3.62501	1.14639	1.01496	1.29485
16.2003	1.52455	1.2196	1.90575
16.3372	1.52809	1.21995	1.91406
16.4139	1.53003	1.22013	1.91864
9.93319	1.23746	1.10973	1.3799
1.27861	1.45854	1.22202	1.74083
16.4522	1.53099	1.22021	1.92092
16.6575	1.536	1.2206	1.9329
4.14796	1.10913	0.975766	1.26072
16.0716	1.52114	1.21924	1.8978
16.83	1.54005	1.22086	1.9427
16.8355	1.54018	1.22087	1.94301
16.8136	1.53968	1.22084	1.94178
16.1866	1.52419	1.21957	1.90491
15.1462	1.4941	1.21538	1.83675
16.9532	1.54286	1.22101	1.94955
15.4282	1.50281	1.21679	1.85607
13.446	1.43231	1.20147	1.70749
9.38835	1.19466	1.07558	1.32694
2.4614	1.26222	1.10991	1.43543
16.4686	1.5314	1.22025	1.92189
16.7233	1.53756	1.22071	1.93666
16.0826	1.52143	1.21927	1.89848
6.97076	1.05625	0.917835	1.21555
6.8941	1.05394	0.914566	1.21456
8.16176	1.10923	0.986742	1.24693
16.5645	1.53376	1.22044	1.92751
16.9888	1.54366	1.22104	1.95151
8.35067	1.12041	0.999938	1.25539
16.6274	1.53528	1.22055	1.93117
9.83463	1.23002	1.10428	1.37007
16.7178	1.53743	1.2207	1.93635
13.9004	1.45045	1.20622	1.74413
2.10273	1.30972	1.14014	1.50452
16.3509	1.52844	1.21998	1.91488
12.1892	1.3752	1.18289	1.59878
16.7616	1.53846	1.22077	1.93884
4.45461	1.09037	0.95429	1.24585
16.9834	1.54353	1.22104	1.95121
5.45942	1.04361	0.896463	1.21491
1.97131	1.32916	1.15166	1.53401
11.9374	1.36239	1.17791	1.57577
12.6465	1.39724	1.19073	1.63955
4.64352	1.07973	0.941611	1.23812
4.58055	1.08321	0.945791	1.24059
8.48483	1.12878	1.00952	1.26214
16.6822	1.53659	1.22064	1.93432
2.26153	1.28777	1.1266	1.472
3.07195	1.19537	1.05971	1.34839
16.9286	1.5423	1.22098	1.94819
3.3786	1.16684	1.03454	1.31605
10.9024	1.30383	1.15072	1.47731
13.2789	1.42532	1.1995	1.69366
2.05344	1.31687	1.14443	1.51529
14.5055	1.47273	1.21131	1.79057
5.14456	1.05438	0.910016	1.22165
13.3008	1.42625	1.19976	1.69549
16.3317	1.52795	1.21994	1.91373
16.2195	1.52505	1.21965	1.90692
4.88994	1.06678	0.925696	1.22936
10.3658	1.26861	1.13053	1.42354
14.1222	1.45886	1.20824	1.76147
6.78184	1.05081	0.910096	1.21329
4.57507	1.08351	0.946157	1.24081
8.3452	1.12007	0.99955	1.25513
16.1976	1.52448	1.2196	1.90558
4.01106	1.11819	0.985715	1.26846
0.602344	1.67509	1.3336	2.10404
3.74274	1.13734	1.00586	1.286
15.4008	1.50198	1.21666	1.85422
12.641	1.39698	1.19065	1.63907
8.97218	1.16235	1.04521	1.29262
15.6226	1.50857	1.21764	1.86902
10.489	1.27702	1.13565	1.43599
5.50049	1.04267	0.895321	1.21427
6.64768	1.04749	0.905273	1.21205
12.4329	1.38714	1.18725	1.62067
15.0613	1.4914	1.21491	1.83081
0.952798	1.54478	1.26673	1.88386
16.4276	1.53037	1.22016	1.91946
16.0032	1.51929	1.21902	1.89352
11.5376	1.34099	1.16885	1.53849
16.1948	1.52441	1.21959	1.90541
10.3959	1.27068	1.13181	1.42659
14.2126	1.4622	1.20901	1.76843
15.6993	1.51079	1.21795	1.87405
9.25419	1.18392	1.06591	1.31499
5.9988	1.03842	0.891124	1.21007
14.9545	1.48794	1.21429	1.82326
10.4589	1.27498	1.13443	1.43295
8.50674	1.13019	1.01109	1.2633
13.4432	1.43219	1.20144	1.70727
11.5869	1.34371	1.17005	1.54313
16.3564	1.52858	1.22	1.91521
10.8915	1.30315	1.15036	1.47623
12.8819	1.408	1.19425	1.66001
11.1543	1.31911	1.15855	1.50193
10.2891	1.26327	1.12718	1.41579
16.5234	1.53275	1.22036	1.92511
16.318	1.5276	1.21991	1.9129
16.882	1.54125	1.22093	1.94561
16.6849	1.53666	1.22065	1.93447
7.38966	1.07133	0.938537	1.22292
6.92969	1.055	0.916063	1.215
3.26908	1.17664	1.04347	1.32681
14.3768	1.46816	1.21033	1.78092
16.2058	1.52469	1.21962	1.90608
4.16439	1.10807	0.974588	1.25985
10.092	1.24919	1.11792	1.39586
4.65721	1.07899	0.940709	1.23759
11.0859	1.31504	1.15651	1.49529
14.9436	1.48758	1.21422	1.82248
12.6766	1.39863	1.1912	1.64219
10.6916	1.29043	1.14342	1.45635
6.05355	1.03867	0.891622	1.20997
9.70321	1.21988	1.09654	1.3571
13.3666	1.42901	1.20055	1.70094
12.7916	1.40392	1.19294	1.6522
13.1475	1.4197	1.19785	1.68264
15.3406	1.50015	1.21637	1.85013
16.6384	1.53554	1.22057	1.9318
16.2249	1.52519	1.21967	1.90725
14.407	1.46924	1.21056	1.78319
8.01391	1.101	0.97672	1.2411
9.56357	1.20886	1.08768	1.34353
8.90647	1.15754	1.04036	1.28793
6.56828	1.04574	0.902697	1.21145
6.84755	1.05261	0.912666	1.214
12.9312	1.41021	1.19495	1.66425
14.5521	1.47436	1.21164	1.79403
14.6534	1.47786	1.21236	1.80151
16.0798	1.52136	1.21926	1.89831
16.7807	1.53891	1.22079	1.93993
1.50312	1.41046	1.19668	1.66243
11.3843	1.33241	1.16494	1.52396
14.0729	1.45701	1.2078	1.75765
9.47596	1.2018	1.08177	1.33516
8.95576	1.16114	1.044	1.29143
9.70595	1.22009	1.09671	1.35737
10.0619	1.24699	1.11642	1.39283
8.30139	1.11742	0.996459	1.25307
16.6794	1.53653	1.22064	1.93416
11.5595	1.3422	1.16939	1.54056
11.7649	1.35333	1.17419	1.55979
16.2222	1.52512	1.21966	1.90709
7.11587	1.06102	0.924483	1.21772
10.4014	1.27106	1.13204	1.42714
16.8109	1.53961	1.22084	1.94163
11.2748	1.32615	1.16198	1.51351
9.21312	1.18069	1.06292	1.3115
16.8191	1.5398	1.22085	1.94209
11.1324	1.31781	1.1579	1.49981
16.1784	1.52398	1.21954	1.9044
16.5206	1.53268	1.22035	1.92495
10.27	1.26192	1.12632	1.41385
9.24324	1.18305	1.06511	1.31405
16.7534	1.53827	1.22075	1.93838
16.9341	1.54243	1.22099	1.9485
2.28343	1.28486	1.12475	1.46777
14.3111	1.4658	1.20981	1.77595
12.9915	1.41288	1.19578	1.6694
16.2824	1.52668	1.21982	1.91075
6.16581	1.03954	0.893136	1.20994
6.4177	1.04289	0.898414	1.2106
5.8619	1.03838	0.890647	1.21062
4.7722	1.07285	0.933213	1.23337
16.4467	1.53085	1.2202	1.92059
15.984	1.51877	1.21896	1.89231
7.53477	1.07748	0.946715	1.22631
12.4932	1.39002	1.18826	1.62603
8.79696	1.14971	1.03227	1.28052
3.4799	1.15818	1.02641	1.30686
6.98719	1.05677	0.918558	1.21577
16.7698	1.53866	1.22078	1.93931
16.6466	1.53574	1.22058	1.93227
16.2989	1.52711	1.21986	1.91174
11.3597	1.33101	1.16429	1.52161
2.62567	1.24272	1.09636	1.40861
7.36228	1.07022	0.937048	1.22233
15.0778	1.49192	1.215	1.83196
13.895	1.45024	1.20617	1.7437
16.6219	1.53515	1.22054	1.93085
0.325813	1.839	1.41136	2.39621
16.1675	1.52369	1.21951	1.90373
12.1509	1.37329	1.18217	1.59531
11.858	1.35825	1.17623	1.56844
16.7588	1.5384	1.22076	1.93869
11.5349	1.34084	1.16878	1.53823
16.0497	1.52055	1.21917	1.89643
1.95762	1.33126	1.15288	1.53723
6.11926	1.03913	0.892437	1.20992
9.58	1.21017	1.08876	1.34511
14.5603	1.47464	1.2117	1.79464
10.5711	1.28252	1.13889	1.44426
16.8273	1.53999	1.22086	1.94255
0.402475	1.78422	1.38701	2.29519
16.9313	1.54237	1.22098	1.94834
0.65984	1.64966	1.32067	2.06062
13.9689	1.45307	1.20686	1.74952
16.8656	1.54087	1.22091	1.94469
5.79345	1.03868	0.890842	1.21106
11.0996	1.31586	1.15692	1.49662
16.9478	1.54274	1.221	1.94925
16.4166	1.5301	1.22013	1.91881
16.0525	1.52062	1.21918	1.8966
10.4808	1.27647	1.13532	1.43516
16.8574	1.54068	1.2209	1.94424
14.8149	1.48333	1.21343	1.81326
16.715	1.53737	1.2207	1.9362
13.9963	1.45412	1.20711	1.75167
16.4495	1.53092	1.22021	1.92076
16.9149	1.54199	1.22096	1.94743
4.23557	1.10357	0.969516	1.25615
12.1564	1.37356	1.18227	1.5958
8.42734	1.12515	1.00539	1.25917
16.2332	1.52541	1.21969	1.90775
14.0483	1.45609	1.20758	1.75573
16.8766	1.54112	1.22092	1.9453
11.0147	1.31074	1.15432	1.48835
5.34717	1.0467	0.900291	1.21692
11.8634	1.35854	1.17635	1.56894
13.8813	1.44971	1.20603	1.74262
4.92279	1.06512	0.923626	1.22829
5.90297	1.03831	0.890671	1.21041
8.5834	1.13517	1.01664	1.26752
8.1864	1.11065	0.98844	1.24797
16.7753	1.53878	1.22079	1.93962
13.8019	1.44662	1.20526	1.73631
6.68601	1.04839	0.906591	1.21237
9.91677	1.23623	1.10884	1.37826
5.32253	1.04749	0.901275	1.21742
16.7205	1.5375	1.2207	1.93651
3.95356	1.12213	0.98996	1.27194
11.4035	1.3335	1.16544	1.52578
3.63597	1.14553	1.01411	1.29399
16.7643	1.53853	1.22077	1.939
16.5973	1.53455	1.2205	1.92942
9.42942	1.19801	1.07851	1.33076
13.1968	1.42182	1.19848	1.68679
8.34794	1.12024	0.999744	1.25526
2.26426	1.28741	1.12637	1.47147
16.7561	1.53834	1.22076	1.93853
3.02267	1.20024	1.06377	1.35423
16.4714	1.53147	1.22025	1.92205
16.893	1.5415	1.22094	1.94622
3.19242	1.18378	1.04979	1.33487
8.22747	1.11304	0.991287	1.24974
10.7546	1.29449	1.14568	1.46264
16.1647	1.52361	1.2195	1.90356
16.2277	1.52527	1.21968	1.90742
7.93177	1.09663	0.971289	1.23814
2.36009	1.2749	1.11833	1.45339
16.6877	1.53672	1.22065	1.93463
8.54507	1.13266	1.01386	1.26538
8.84076	1.15282	1.0355	1.28342
12.4576	1.38832	1.18767	1.62287
4.90362	1.06608	0.924832	1.22891
3.52919	1.15409	1.02249	1.30264
10.5136	1.27868	1.13664	1.43847
4.72566	1.0753	0.936229	1.23504
1.08148	1.50785	1.24764	1.82232
16.0881	1.52158	1.21928	1.89882
0.306648	1.85438	1.41773	2.42553
6.82839	1.05207	0.911903	1.21379
13.2954	1.42602	1.19969	1.69503
9.73606	1.22244	1.09853	1.36033
5.85095	1.03842	0.890658	1.21069
16.9697	1.54323	1.22102	1.95046
1.34158	1.44429	1.21456	1.71747
13.1859	1.42135	1.19834	1.68587
11.7621	1.35318	1.17413	1.55954
10.311	1.2648	1.12815	1.418
15.5706	1.50705	1.21742	1.86558
15.242	1.49711	1.21588	1.84338
3.00624	1.20189	1.06512	1.35622
15.1818	1.49522	1.21557	1.83922
15.8937	1.51628	1.21866	1.88659
15.8553	1.51521	1.21853	1.88414
9.35275	1.19178	1.07303	1.32368
15.0504	1.49105	1.21484	1.83004
3.90702	1.12538	0.993425	1.27486
15.2283	1.49668	1.21581	1.84244
4.33961	1.09717	0.962213	1.25107
15.6089	1.50817	1.21758	1.86812
11.6581	1.34759	1.17175	1.54982
11.6663	1.34803	1.17194	1.55059
9.86475	1.2323	1.10597	1.37307
2.13284	1.30544	1.13755	1.4981
10.8367	1.29971	1.14852	1.47081
11.8935	1.36012	1.17699	1.57173
13.2379	1.42358	1.19899	1.69023
0.495565	1.72862	1.36035	2.19658
13.2844	1.42555	1.19956	1.69412
15.8882	1.51613	1.21864	1.88624
9.18027	1.17813	1.06052	1.30877
12.8135	1.40491	1.19326	1.6541
15.9101	1.51674	1.21872	1.88763
13.1913	1.42159	1.19841	1.68633
8.37258	1.12175	1.00149	1.25645
13.5089	1.43489	1.20218	1.71266
7.49096	1.07558	0.944196	1.22524
13.539	1.43612	1.20251	1.71512
15.1243	1.49341	1.21526	1.83522
15.0449	1.49087	1.21481	1.82966
7.05016	1.0588	0.9214	1.21669
15.0559	1.49122	1.21488	1.83043
15.2585	1.49762	1.21596	1.84451
9.90855	1.23561	1.10839	1.37744
15.2557	1.49753	1.21595	1.84432
15.2776	1.49821	1.21606	1.84583
15.5295	1.50584	1.21724	1.86286
0.191655	1.9683	1.45496	2.66275
15.2064	1.496	1.2157	1.84093
6.51626	1.04469	0.901127	1.21112
14.9874	1.48901	1.21448	1.8256
8.39996	1.12344	1.00344	1.25779
15.9648	1.51824	1.2189	1.8911
8.67375	1.1412	1.02322	1.27279
14.6452	1.47758	1.2123	1.8009
15.9703	1.51839	1.21892	1.89145
13.7033	1.44273	1.20426	1.72842
15.1134	1.49306	1.2152	1.83446
6.55186	1.0454	0.902191	1.21134
15.8416	1.51483	1.21848	1.88326
12.7314	1.40116	1.19204	1.64697
15.8772	1.51583	1.2186	1.88554
5.79893	1.03865	0.890815	1.21102
0.394261	1.78964	1.38952	2.30499
13.3145	1.42682	1.19993	1.69663
7.21443	1.06453	0.929323	1.21942
15.5925	1.50769	1.21751	1.86703
3.77286	1.13509	1.00355	1.28386
15.1407	1.49393	1.21535	1.83637
13.8649	1.44907	1.20588	1.74132
15.0285	1.49034	1.21472	1.8285
1.45658	1.41983	1.20166	1.67761
15.6828	1.51032	1.21788	1.87298
15.6199	1.50849	1.21763	1.86884
7.19253	1.06373	0.928225	1.21902
6.37389	1.04217	0.897321	1.21041
15.5651	1.50689	1.2174	1.86522
15.5487	1.50641	1.21733	1.86413
7.84963	1.09239	0.965967	1.23536
2.77626	1.22589	1.084	1.38635
15.1681	1.49479	1.21549	1.83827
15.201	1.49583	1.21567	1.84055
8.37531	1.12192	1.00169	1.25658
15.6281	1.50873	1.21766	1.86938
8.83529	1.15243	1.0351	1.28305
10.8531	1.30075	1.14908	1.47244
15.8006	1.51368	1.21833	1.88062
12.6109	1.39557	1.19017	1.63642
15.6582	1.50961	1.21778	1.87136
10.8422	1.30006	1.14871	1.47135
11.4582	1.33658	1.16686	1.53098
3.48264	1.15795	1.02619	1.30662
12.5671	1.39352	1.18947	1.63257
6.80375	1.0514	0.910938	1.21352
15.316	1.49939	1.21625	1.84845
12.6191	1.39596	1.1903	1.63715
14.4617	1.47119	1.21098	1.7873
15.305	1.49906	1.2162	1.8477
6.92695	1.05491	0.915946	1.21497
15.7924	1.51344	1.2183	1.88009
13.7636	1.44511	1.20488	1.73325
4.69554	1.07692	0.938193	1.23615
13.8046	1.44673	1.20529	1.73653
14.4426	1.47051	1.21084	1.78587
14.2619	1.46401	1.20941	1.7722
15.9347	1.51742	1.2188	1.8892
12.5096	1.3908	1.18853	1.62748
15.0312	1.49043	1.21474	1.82869
1.56609	1.3982	1.19011	1.64267
15.6253	1.50865	1.21765	1.8692
12.5479	1.39261	1.18916	1.63087
15.5624	1.50681	1.21739	1.86504
15.5815	1.50737	1.21747	1.86631
5.84821	1.03842	0.890662	1.2107
15.869	1.5156	1.21858	1.88501
13.6842	1.44197	1.20407	1.72688
5.33896	1.04696	0.900613	1.21709
8.67649	1.14139	1.02342	1.27296
7.19527	1.06383	0.928362	1.21907
10.4342	1.27331	1.13342	1.43046
7.12682	1.0614	0.925008	1.2179
15.8115	1.51399	1.21837	1.88133
10.5985	1.28434	1.13994	1.44702
15.7951	1.51352	1.21831	1.88027
12.0578	1.36858	1.18036	1.58682
9.53893	1.20688	1.08605	1.34117
10.8093	1.29798	1.14759	1.46809
8.38079	1.12226	1.00208	1.25685
15.1298	1.49358	1.21529	1.8356
15.3379	1.50007	1.21636	1.84994
15.8964	1.51636	1.21867	1.88676
5.59632	1.04086	0.893169	1.21297
11.9346	1.36225	1.17786	1.57552
11.6745	1.34848	1.17213	1.55136
14.9984	1.48937	1.21455	1.82637
15.2366	1.49694	1.21585	1.843
15.2667	1.49787	1.21601	1.84508
15.5076	1.50519	1.21715	1.86139
6.96528	1.05608	0.917596	1.21547
15.472	1.50413	1.21699	1.85901
15.0175	1.48999	1.21466	1.82773
15.1599	1.49453	1.21545	1.8377
15.8225	1.51429	1.21841	1.88203
6.28902	1.04095	0.89541	1.21014
15.3214	1.49956	1.21628	1.84882
11.962	1.36367	1.17842	1.57804
15.7376	1.51189	1.21809	1.87654
14.1715	1.46069	1.20866	1.76527
12.3316	1.38223	1.18549	1.61162
3.33479	1.1707	1.03809	1.32025
10.7902	1.29677	1.14692	1.46619
15.0531	1.49113	1.21486	1.83023
15.5049	1.50511	1.21714	1.86121
15.6007	1.50793	1.21755	1.86758
15.7266	1.51158	1.21805	1.87583
6.95707	1.05583	0.917239	1.21536
12.1673	1.37411	1.18248	1.5968
15.1106	1.49297	1.21518	1.83426
3.34027	1.17021	1.03765	1.31972
11.847	1.35768	1.176	1.56742
15.1736	1.49497	1.21552	1.83865
15.8143	1.51406	1.21838	1.8815
15.7732	1.5129	1.21823	1.87885
15.5405	1.50616	1.21729	1.86358
7.64976	1.08268	0.95352	1.22933
15.9156	1.51689	1.21874	1.88798
13.1338	1.41911	1.19767	1.68149
15.357	1.50065	1.21645	1.85125
0.755668	1.61138	1.30105	1.99572
3.20064	1.183	1.04911	1.33399
7.97558	1.09894	0.974173	1.23969
6.19593	1.03984	0.893636	1.20997
15.2831	1.49838	1.21609	1.8462
4.09867	1.11234	0.979322	1.26342
10.5657	1.28216	1.13868	1.44371
15.7787	1.51306	1.21825	1.87921
15.1024	1.49271	1.21514	1.83369
15.9073	1.51666	1.21871	1.88746
15.5897	1.50761	1.2175	1.86685
8.69018	1.14232	1.02442	1.27379
3.2417	1.17917	1.04572	1.32964
0.0492827	2.23958	1.40062	3.58105
15.0476	1.49096	1.21483	1.82985
6.83386	1.05222	0.91212	1.21385
15.2475	1.49728	1.21591	1.84376
15.2092	1.49608	1.21571	1.84111
7.54846	1.07808	0.94751	1.22665
15.4748	1.50421	1.217	1.8592
9.10908	1.17264	1.0553	1.30302
15.3324	1.4999	1.21633	1.84957
4.16165	1.10825	0.974784	1.25999
12.9148	1.40947	1.19472	1.66284
15.5542	1.50657	1.21735	1.86449
15.127	1.49349	1.21527	1.83541
0.399737	1.78602	1.38784	2.29843
15.8718	1.51567	1.21859	1.88519
15.7814	1.51313	1.21826	1.87938
10.8394	1.29989	1.14862	1.47108
10.7217	1.29238	1.1445	1.45936
10.8833	1.30264	1.15009	1.47542
15.8334	1.5146	1.21845	1.88273
12.5534	1.39287	1.18925	1.63136
3.78381	1.13428	1.00272	1.28309
9.80451	1.22771	1.10255	1.36708
15.5514	1.50649	1.21734	1.86431
11.7128	1.35054	1.17301	1.55494
15.4529	1.50355	1.2169	1.85773
8.20009	1.11144	0.989387	1.24855
11.3241	1.32898	1.16333	1.51822
12.4192	1.38648	1.18701	1.61945
15.6445	1.50921	1.21773	1.87046
4.21367	1.10494	0.97107	1.25727
11.4965	1.33872	1.16783	1.53461
15.4884	1.50462	1.21706	1.86011
15.2201	1.49642	1.21577	1.84187
11.3049	1.32788	1.16281	1.51639
13.8183	1.44726	1.20542	1.73762
15.6034	1.50801	1.21756	1.86776
15.7184	1.51134	1.21802	1.8753
15.0367	1.4906	1.21477	1.82908
15.086	1.49219	1.21505	1.83254
11.7457	1.3523	1.17376	1.55801
6.52721	1.0449	0.90145	1.21118
12.7779	1.40329	1.19274	1.65101
0.821378	1.58758	1.28881	1.95561
15.6691	1.50992	1.21783	1.87208
15.9758	1.51854	1.21894	1.89179
6.65864	1.04774	0.905645	1.21214
10.3411	1.2669	1.12947	1.42105
7.11039	1.06083	0.924221	1.21763
8.25211	1.11449	0.993004	1.25083
7.13503	1.06168	0.925404	1.21803
15.1626	1.49462	1.21546	1.83789
15.7157	1.51126	1.21801	1.87512
15.1216	1.49332	1.21524	1.83503
10.7929	1.29694	1.14702	1.46646
9.49239	1.20313	1.0829	1.33672
15.0257	1.49025	1.2147	1.8283
15.2858	1.49847	1.2161	1.84639
10.9435	1.30638	1.15206	1.48136
15.0695	1.49166	1.21495	1.83139
15.932	1.51734	1.21879	1.88902
15.4693	1.50405	1.21698	1.85883
15.6883	1.51048	1.2179	1.87333
12.7396	1.40154	1.19216	1.64768
15.4775	1.50429	1.21701	1.85938
15.3652	1.5009	1.21649	1.85181
15.765	1.51267	1.2182	1.87832
15.9183	1.51696	1.21875	1.88815
15.6774	1.51016	1.21786	1.87262
15.8608	1.51537	1.21855	1.88449
15.7212	1.51142	1.21803	1.87548
15.702	1.51087	1.21796	1.87423
15.3981	1.5019	1.21665	1.85403
15.6801	1.51024	1.21787	1.8728
8.43281	1.12549	1.00579	1.25944
15.7841	1.51321	1.21827	1.87956
10.9325	1.3057	1.15171	1.48028
7.71274	1.08565	0.95736	1.23112
6.51353	1.04463	0.901047	1.2111
15.1517	1.49427	1.21541	1.83713
15.4309	1.50289	1.2168	1.85625
15.88	1.5159	1.21861	1.88571
15.9293	1.51727	1.21878	1.88885
5.39098	1.0454	0.898671	1.21609
15.9867	1.51884	1.21897	1.89248
15.2749	1.49813	1.21605	1.84564
0.246413	1.90859	1.43794	2.5333
15.7595	1.51251	1.21818	1.87797
12.2714	1.37928	1.18441	1.6062
0.533896	1.70833	1.35031	2.16129
4.92005	1.06526	0.923798	1.22838
13.6458	1.44044	1.20366	1.72379
2.39295	1.27073	1.11559	1.44744
15.2694	1.49796	1.21602	1.84526
6.5765	1.04591	0.902954	1.21151
15.5678	1.50697	1.21741	1.8654
15.5323	1.50592	1.21726	1.86304
9.01599	1.16561	1.04845	1.29586
15.8389	1.51475	1.21847	1.88308
3.19516	1.18352	1.04956	1.33458
15.0641	1.49148	1.21492	1.831
12.9093	1.40923	1.19464	1.66237
13.6075	1.4389	1.20326	1.72068
15.0887	1.49227	1.21506	1.83273
15.7102	1.51111	1.21799	1.87476
13.0462	1.41529	1.19652	1.67407
9.69773	1.21945	1.0962	1.35656
15.075	1.49184	1.21498	1.83177
12.0962	1.37053	1.18111	1.59032
15.2037	1.49591	1.21568	1.84074
11.4555	1.33642	1.16679	1.53072
8.89826	1.15695	1.03975	1.28735
15.1708	1.49488	1.21551	1.83846
9.05432	1.16848	1.05127	1.29876
15.7431	1.51205	1.21812	1.8769
8.54233	1.13248	1.01366	1.26523
4.75851	1.07356	0.934097	1.23386
15.3543	1.50057	1.21644	1.85106
4.44639	1.09085	0.95485	1.24621
2.93779	1.20883	1.07074	1.36473
15.5158	1.50543	1.21718	1.86194
15.034	1.49052	1.21475	1.82888
15.2393	1.49702	1.21587	1.84319
15.9512	1.51787	1.21886	1.89024
8.7066	1.14344	1.02562	1.27479
8.14533	1.1083	0.985614	1.24625
15.5377	1.50608	1.21728	1.8634
9.82368	1.22918	1.10365	1.36898
10.949	1.30671	1.15224	1.4819
15.8991	1.51643	1.21868	1.88693
3.64144	1.1451	1.01368	1.29357
5.80714	1.03861	0.890779	1.21096
11.4993	1.33887	1.1679	1.53487
6.68875	1.04846	0.906687	1.2124
9.6594	1.21645	1.09383	1.35282
15.9265	1.51719	1.21877	1.88867
11.7046	1.3501	1.17283	1.55418
15.1325	1.49367	1.2153	1.83579
15.2804	1.4983	1.21608	1.84602
1.83989	1.34991	1.16355	1.56611
15.1489	1.49419	1.21539	1.83694
15.0203	1.49007	1.21467	1.82792
4.98302	1.06213	0.919863	1.22639
15.7349	1.51181	1.21808	1.87637
13.1201	1.41852	1.1975	1.68033
15.3735	1.50115	1.21653	1.85236
15.2968	1.4988	1.21616	1.84714
9.25693	1.18413	1.06611	1.31523
13.4295	1.43163	1.20128	1.70614
15.8526	1.51514	1.21852	1.88396
4.66543	1.07854	0.940168	1.23728
4.76125	1.07342	0.93392	1.23376
8.90373	1.15734	1.04015	1.28773
5.84	1.03845	0.890677	1.21075
7.68262	1.08422	0.955514	1.23026
9.03789	1.16725	1.05006	1.29751
3.35396	1.169	1.03654	1.3184
15.6062	1.50809	1.21757	1.86794
7.66619	1.08345	0.954514	1.22979
15.5432	1.50624	1.2173	1.86377
2.17939	1.29893	1.13356	1.48842
15.5268	1.50576	1.21723	1.86267
15.5843	1.50745	1.21748	1.86649
12.5315	1.39184	1.18889	1.62942
7.57858	1.07943	0.949275	1.22742
14.2317	1.46291	1.20916	1.76989
15.7047	1.51095	1.21797	1.87441
6.40127	1.04261	0.897996	1.21052
10.2344	1.25941	1.1247	1.41025
10.8312	1.29937	1.14834	1.47027
14.73	1.48047	1.21287	1.80711
15.6609	1.50969	1.21779	1.87154
10.1796	1.25551	1.12215	1.40471
15.1654	1.49471	1.21548	1.83808
4.40806	1.09309	0.957478	1.24791
15.8362	1.51468	1.21846	1.88291
13.0982	1.41756	1.19721	1.67848
1.88095	1.34327	1.15979	1.55578
15.9539	1.51794	1.21886	1.89041
15.4912	1.5047	1.21707	1.8603
15.9676	1.51832	1.21891	1.89127
7.40335	1.07189	0.939288	1.22322
9.95784	1.2393	1.11105	1.38237
5.22944	1.05082	0.905481	1.21949
12.7834	1.40354	1.19282	1.65149
11.7402	1.35201	1.17364	1.5575
10.1166	1.25097	1.11913	1.39835
8.23294	1.11336	0.991668	1.24998
10.5602	1.28179	1.13847	1.44316
15.2229	1.49651	1.21578	1.84206
4.26021	1.10203	0.967775	1.25491
15.3187	1.49948	1.21627	1.84864
12.2741	1.37941	1.18446	1.60645
9.0242	1.16622	1.04905	1.29647
15.3762	1.50124	1.21654	1.85255
7.28288	1.06711	0.932832	1.22071
12.1098	1.37122	1.18138	1.59157
1.70847	1.37215	1.17595	1.60109
15.6965	1.51071	1.21794	1.87387
13.3748	1.42935	1.20064	1.70162
8.56697	1.13409	1.01545	1.2666
14.7629	1.48158	1.21309	1.8095
15.4967	1.50486	1.2171	1.86066
9.22133	1.18133	1.06352	1.31219
15.8033	1.51375	1.21834	1.8808
8.33151	1.11924	0.998582	1.25448
7.78666	1.08924	0.961966	1.23335
6.34104	1.04168	0.896549	1.21029
13.4377	1.43197	1.20137	1.70682
8.18092	1.11033	0.988062	1.24774
15.8499	1.51506	1.21851	1.88379
7.36502	1.07033	0.937196	1.22239
14.4508	1.4708	1.2109	1.78648
12.1947	1.37548	1.18299	1.59928
1.24028	1.46754	1.22672	1.75564
9.85379	1.23147	1.10536	1.37198
9.08991	1.17118	1.05389	1.30152
15.0997	1.49262	1.21512	1.8335
11.1926	1.32137	1.15966	1.50563
7.74559	1.08723	0.959395	1.2321
1.05136	1.51611	1.25192	1.83606
7.20074	1.06403	0.928636	1.21917
15.3926	1.50174	1.21662	1.85366
0.249151	1.9059	1.43703	2.52776
13.8758	1.4495	1.20598	1.74218
15.4173	1.50248	1.21674	1.85533
15.3132	1.49931	1.21624	1.84826
15.65	1.50937	1.21775	1.87082
5.22122	1.05114	0.90589	1.21968
7.40061	1.07178	0.939137	1.22316
15.2448	1.49719	1.21589	1.84357
15.3242	1.49965	1.21629	1.84901
5.85642	1.0384	0.890651	1.21065
0.440806	1.76011	1.37563	2.25203
4.95291	1.06362	0.921739	1.22733
15.7622	1.51259	1.21819	1.87814
11.9401	1.36254	1.17797	1.57602
4.78316	1.07227	0.932507	1.23298
15.817	1.51414	1.21839	1.88168
15.3023	1.49897	1.21618	1.84752
15.3351	1.49998	1.21635	1.84976
15.9457	1.51772	1.21884	1.88989
15.2612	1.4977	1.21598	1.8447
5.81535	1.03856	0.890747	1.21091
0.58044	1.68535	1.33878	2.12164
15.8581	1.51529	1.21854	1.88431
5.86464	1.03837	0.890645	1.21061
15.3515	1.50048	1.21643	1.85088
0.323075	1.84115	1.41226	2.40028
14.4699	1.47148	1.21104	1.78792
15.2941	1.49872	1.21614	1.84695
6.86124	1.05299	0.913218	1.21416
7.75654	1.08776	0.960077	1.23243
15.9731	1.51847	1.21893	1.89162
14.5904	1.47569	1.21192	1.79687
15.3598	1.50074	1.21647	1.85143
15.3899	1.50165	1.21661	1.85348
12.4603	1.38845	1.18771	1.62311
3.26635	1.17689	1.04369	1.32709
8.06319	1.1037	0.980027	1.24297
14.9326	1.48722	1.21416	1.8217
12.5233	1.39145	1.18876	1.6287
15.7239	1.5115	1.21804	1.87565
3.26087	1.17739	1.04414	1.32765
8.47662	1.12826	1.00893	1.26171
7.14599	1.06207	0.925934	1.21822
4.61614	1.08123	0.943423	1.23918
7.74285	1.0871	0.959224	1.23201
15.2995	1.49889	1.21617	1.84733
9.97153	1.24032	1.11177	1.38374
7.80583	1.09019	0.963176	1.23395
15.5459	1.50632	1.21732	1.86395
7.35681	1.07001	0.936752	1.22221
11.6992	1.34981	1.1727	1.55366
15.1435	1.49401	1.21536	1.83656
4.02475	1.11726	0.98471	1.26765
15.4665	1.50396	1.21696	1.85865
6.08093	1.03884	0.891933	1.20994
15.7978	1.5136	1.21832	1.88044
12.3699	1.38409	1.18616	1.61505
15.0723	1.49175	1.21497	1.83158
5.06516	1.05813	0.914796	1.22392
13.0353	1.41481	1.19637	1.67313
14.563	1.47474	1.21172	1.79485
4.49841	1.08784	0.951312	1.24397
3.80298	1.13286	1.00126	1.28176
5.9632	1.03833	0.890893	1.21017
15.0093	1.48972	1.21461	1.82715
13.0709	1.41637	1.19685	1.67616
15.4364	1.50306	1.21683	1.85662
7.67988	1.08409	0.955347	1.23018
3.16504	1.18637	1.05204	1.33785
8.59435	1.13589	1.01743	1.26814
12.9121	1.40935	1.19468	1.6626
7.51013	1.0764	0.945293	1.2257
0.0574964	2.2132	1.41937	3.451
15.587	1.50753	1.21749	1.86667
7.71547	1.08578	0.957529	1.2312
15.9895	1.51892	1.21898	1.89265
11.4144	1.33412	1.16573	1.52682
13.1037	1.4178	1.19728	1.67894
13.1174	1.4184	1.19746	1.6801
11.5623	1.34235	1.16946	1.54081
15.4392	1.50314	1.21684	1.85681
11.6937	1.34951	1.17257	1.55315
15.6472	1.50929	1.21774	1.87064
15.8909	1.51621	1.21865	1.88641
15.4939	1.50478	1.21709	1.86048
3.08564	1.19403	1.05859	1.3468
8.09057	1.10521	0.981879	1.24404
15.5103	1.50527	1.21716	1.86158
15.4556	1.50363	1.21691	1.85791
1.18005	1.48223	1.23436	1.77987
14.8587	1.48479	1.2137	1.81642
0.999343	1.53092	1.25957	1.86071
15.42	1.50256	1.21675	1.85551
8.14807	1.10845	0.985801	1.24636
13.2242	1.42299	1.19882	1.68908
10.3247	1.26576	1.12875	1.41939
7.72369	1.08617	0.958036	1.23145
8.32603	1.11891	0.998195	1.25422
11.6636	1.34789	1.17187	1.55033
12.8162	1.40504	1.1933	1.65434
15.9375	1.51749	1.21881	1.88937
11.1735	1.32024	1.15911	1.50378
15.4583	1.50372	1.21693	1.85809
8.24389	1.114	0.992431	1.25046
0.279268	1.87782	1.42692	2.47119
15.6856	1.5104	1.21789	1.87315
15.409	1.50223	1.2167	1.85477
15.3433	1.50023	1.21639	1.85032
4.02749	1.11708	0.984509	1.26749
8.91469	1.15814	1.04096	1.2885
12.7889	1.40379	1.1929	1.65196
15.0066	1.48963	1.21459	1.82695
5.81809	1.03855	0.890737	1.21089
5.42109	1.04458	0.897652	1.21555
2.12737	1.30621	1.13802	1.49926
2.19582	1.29666	1.13216	1.48507
9.84832	1.23106	1.10505	1.37143
7.32121	1.06859	0.934848	1.22148
15.9484	1.51779	1.21885	1.89006
15.0942	1.49245	1.21509	1.83312
5.64013	1.0402	0.892414	1.21246
10.1906	1.25629	1.12267	1.40582
11.2501	1.32472	1.16129	1.51115
14.6698	1.47842	1.21247	1.80271
7.96189	1.09821	0.973268	1.2392
7.87975	1.09393	0.967906	1.23636
9.92498	1.23685	1.10928	1.37908
14.1441	1.45967	1.20842	1.76316
7.11861	1.06111	0.924614	1.21776
12.8272	1.40553	1.19346	1.65528
11.7567	1.35289	1.17401	1.55903
14.051	1.45619	1.20761	1.75594
14.2235	1.4626	1.2091	1.76927
6.74899	1.04996	0.908861	1.21296
1.82346	1.3526	1.16507	1.57031
14.062	1.4566	1.20771	1.75679
14.9381	1.4874	1.21419	1.8221
14.2509	1.46361	1.20932	1.77136
4.15617	1.1086	0.975177	1.26028
14.96	1.48812	1.21432	1.82365
14.3604	1.46758	1.2102	1.77968
7.77571	1.0887	0.961277	1.23301
13.5007	1.43456	1.20209	1.71199
14.6808	1.4788	1.21254	1.80351
14.574	1.47512	1.2118	1.79566
10.5164	1.27886	1.13675	1.43875
14.8615	1.48488	1.21372	1.81661
9.9195	1.23644	1.10899	1.37853
9.67583	1.21774	1.09485	1.35442
3.34848	1.16949	1.03698	1.31892
14.3221	1.46619	1.2099	1.77678
5.08159	1.05734	0.913791	1.22344
10.938	1.30604	1.15188	1.48082
14.2673	1.46421	1.20946	1.77261
14.0291	1.45536	1.20741	1.75423
14.0373	1.45567	1.20749	1.75487
13.8977	1.45034	1.20619	1.74392
1.36622	1.43889	1.21172	1.70863
8.58066	1.13499	1.01644	1.26737
14.5137	1.47302	1.21137	1.79119
14.3248	1.46629	1.20992	1.77699
13.1722	1.42076	1.19816	1.68472
11.1242	1.31733	1.15766	1.49902
14.8724	1.48524	1.21379	1.8174
14.8341	1.48397	1.21355	1.81464
13.7937	1.4463	1.20518	1.73566
11.5814	1.34341	1.16992	1.54262
14.0538	1.45629	1.20763	1.75615
3.47443	1.15863	1.02684	1.30734
6.37937	1.04226	0.897454	1.21043
10.2316	1.25921	1.12458	1.40997
14.9737	1.48857	1.2144	1.82462
8.41638	1.12446	1.00461	1.25861
14.5493	1.47426	1.21162	1.79383
12.8381	1.40603	1.19362	1.65623
9.00504	1.16479	1.04764	1.29504
8.73946	1.1457	1.02804	1.27683
6.66959	1.048	0.90602	1.21223
8.49305	1.12931	1.01011	1.26257
11.6471	1.34699	1.17149	1.54879
14.7602	1.48149	1.21307	1.8093
14.5931	1.47578	1.21194	1.79707
6.21235	1.04002	0.893924	1.20999
14.344	1.46698	1.21007	1.77844
14.5548	1.47445	1.21166	1.79424
14.2263	1.46271	1.20912	1.76948
14.7246	1.48029	1.21284	1.80671
10.0181	1.24377	1.11419	1.38842
14.0565	1.4564	1.20766	1.75637
13.6486	1.44055	1.20369	1.72401
14.459	1.47109	1.21096	1.7871
11.3733	1.33179	1.16465	1.52292
11.0503	1.31289	1.15542	1.49183
13.6787	1.44175	1.20401	1.72644
13.4679	1.43321	1.20172	1.70929
14.3303	1.46649	1.20996	1.7774
4.50115	1.08769	0.951127	1.24386
14.0757	1.45712	1.20783	1.75786
14.1633	1.46038	1.20859	1.76464
1.09243	1.50489	1.24611	1.81742
11.3706	1.33164	1.16458	1.52266
10.9271	1.30536	1.15153	1.47974
14.5165	1.47311	1.21139	1.79139
14.7054	1.47964	1.21271	1.80531
13.3419	1.42797	1.20025	1.6989
11.6909	1.34936	1.17251	1.5529
14.2454	1.46341	1.20928	1.77094
10.9462	1.30654	1.15215	1.48163
14.2701	1.46431	1.20948	1.77282
3.90976	1.12519	0.99322	1.27469
4.24652	1.10288	0.968741	1.2556
14.6123	1.47645	1.21207	1.79849
8.52316	1.13124	1.01228	1.26419
14.626	1.47692	1.21217	1.79949
4.19724	1.10598	0.97224	1.25812
12.0606	1.36872	1.18041	1.58707
4.95017	1.06375	0.92191	1.22742
13.331	1.42752	1.20012	1.69799
14.7383	1.48075	1.21293	1.80771
14.6506	1.47777	1.21234	1.80131
2.34366	1.27701	1.1197	1.45642
13.8101	1.44694	1.20534	1.73697
14.804	1.48296	1.21336	1.81247
10.5903	1.28379	1.13963	1.44619
10.4917	1.27721	1.13576	1.43627
14.7793	1.48214	1.2132	1.81069
6.16855	1.03957	0.89318	1.20994
10.0235	1.24417	1.11448	1.38897
14.9491	1.48776	1.21426	1.82287
14.8177	1.48342	1.21344	1.81346
14.2482	1.46351	1.2093	1.77115
13.4021	1.43049	1.20096	1.70388
14.1332	1.45927	1.20833	1.76231
14.7081	1.47973	1.21273	1.80551
14.6315	1.47711	1.21221	1.7999
14.8779	1.48542	1.21382	1.81779
11.795	1.35493	1.17486	1.5626
14.9217	1.48686	1.21409	1.82092
14.8423	1.48424	1.2136	1.81524
9.16931	1.17728	1.05972	1.30787
14.7985	1.48278	1.21332	1.81208
10.1522	1.25354	1.12085	1.40194
14.8532	1.4846	1.21367	1.81602
14.396	1.46885	1.21048	1.78237
5.53882	1.04188	0.894376	1.21372
14.1469	1.45977	1.20845	1.76337
14.0948	1.45784	1.208	1.75935
1.76322	1.36269	1.17072	1.58614
14.8834	1.4856	1.21386	1.81818
14.125	1.45896	1.20826	1.76168
8.09331	1.10537	0.982065	1.24415
5.47311	1.04329	0.896068	1.21469
1.3717	1.4377	1.2111	1.70669
14.3851	1.46846	1.21039	1.78154
14.2974	1.4653	1.2097	1.77491
7.56489	1.07881	0.94847	1.22707
14.6479	1.47767	1.21232	1.8011
1.2348	1.46885	1.2274	1.75779
14.6096	1.47635	1.21205	1.79828
14.1523	1.45998	1.2085	1.76379
5.18289	1.05271	0.907883	1.22064
13.884	1.44981	1.20606	1.74283
14.3933	1.46875	1.21046	1.78216
14.7109	1.47982	1.21275	1.80571
14.7656	1.48167	1.21311	1.8097
7.27467	1.06679	0.932405	1.22055
14.2098	1.4621	1.20898	1.76822
14.229	1.46281	1.20914	1.76968
14.741	1.48084	1.21295	1.80791
14.7218	1.48019	1.21282	1.80651
14.6068	1.47626	1.21203	1.79808
14.1742	1.46079	1.20868	1.76548
14.9299	1.48713	1.21414	1.82151
10.5492	1.28106	1.13804	1.44206
10.5766	1.28289	1.1391	1.44482
14.2044	1.4619	1.20894	1.7678
14.3823	1.46836	1.21037	1.78134
7.78118	1.08897	0.961621	1.23318
2.18486	1.29817	1.1331	1.4873
6.56281	1.04563	0.902528	1.21141
5.96046	1.03833	0.890878	1.21018
10.4452	1.27405	1.13387	1.43157
14.9409	1.48749	1.21421	1.82229
14.8067	1.48305	1.21337	1.81267
14.1113	1.45845	1.20814	1.76062
10.6177	1.2856	1.14067	1.44894
13.1639	1.42041	1.19806	1.68403
13.999	1.45422	1.20714	1.75188
2.43402	1.26559	1.11218	1.44017
14.9682	1.48839	1.21437	1.82424
5.87833	1.03834	0.890644	1.21053
14.3002	1.4654	1.20972	1.77512
14.4234	1.46983	1.21069	1.78443
14.0209	1.45505	1.20734	1.75359
2.9241	1.21024	1.07187	1.36648
8.5259	1.13142	1.01248	1.26434
10.081	1.24839	1.11738	1.39476
14.6835	1.47889	1.21256	1.80371
14.7766	1.48204	1.21318	1.81049
14.1907	1.4614	1.20882	1.76674
14.9135	1.48659	1.21404	1.82034
13.6896	1.44219	1.20412	1.72732
7.64703	1.08255	0.953355	1.22926
14.4316	1.47012	1.21075	1.78505
10.2672	1.26173	1.1262	1.41357
14.24	1.46321	1.20923	1.77052
2.52984	1.25394	1.10425	1.42392
1.28409	1.45727	1.22136	1.73875
7.23908	1.06545	0.930573	1.21987
14.5767	1.47521	1.21182	1.79586
10.4123	1.27181	1.1325	1.42825
5.97415	1.03836	0.890956	1.21014
14.5685	1.47493	1.21176	1.79525
0.788523	1.59925	1.29482	1.97527
14.3385	1.46679	1.21003	1.77803
12.693	1.39939	1.19146	1.64362
7.06385	1.05925	0.922032	1.2169
14.0784	1.45722	1.20785	1.75807
5.45121	1.04381	0.896708	1.21504
14.1304	1.45916	1.20831	1.7621
2.1876	1.29779	1.13286	1.48674
3.01172	1.20134	1.06467	1.35555
14.0401	1.45578	1.20751	1.75509
14.3741	1.46807	1.21031	1.78072
14.919	1.48677	1.21407	1.82073
12.6136	1.3957	1.19022	1.63666
14.4946	1.47234	1.21122	1.78976
6.87219	1.05331	0.913664	1.21429
14.6342	1.4772	1.21222	1.8001
14.8259	1.48369	1.2135	1.81405
14.6616	1.47814	1.21241	1.80211
14.9518	1.48785	1.21427	1.82307
14.3632	1.46767	1.21022	1.77989
5.38824	1.04548	0.898768	1.21614
11.4336	1.3352	1.16623	1.52864
14.1879	1.4613	1.2088	1.76653
6.15212	1.03941	0.892921	1.20993
10.8942	1.30332	1.15045	1.4765
12.7861	1.40367	1.19286	1.65173
13.1311	1.41899	1.19764	1.68126
14.5658	1.47483	1.21174	1.79505
12.9696	1.41191	1.19548	1.66753
8.40269	1.12361	1.00363	1.25793
12.6656	1.39813	1.19103	1.64123
4.09046	1.11288	0.979918	1.26388
4.5696	1.08382	0.946523	1.24103
14.1058	1.45825	1.20809	1.7602
13.3337	1.42763	1.20016	1.69822
2.70507	1.23373	1.08984	1.39661
14.3467	1.46708	1.21009	1.77865
11.3295	1.32929	1.16348	1.51874
14.5083	1.47283	1.21133	1.79078
14.689	1.47908	1.2126	1.80411
13.4542	1.43264	1.20156	1.70817
14.971	1.48848	1.21439	1.82443
5.27325	1.04918	0.903404	1.21848
13.257	1.42439	1.19923	1.69183
8.504	1.13001	1.0109	1.26316
7.15146	1.06226	0.926201	1.21831
14.2591	1.46391	1.20939	1.77199
14.8971	1.48605	1.21394	1.81916
12.3754	1.38436	1.18626	1.61554
14.9162	1.48668	1.21406	1.82053
3.13766	1.18899	1.0543	1.34089
14.1852	1.46119	1.20878	1.76632
14.1551	1.46008	1.20852	1.764
14.6014	1.47607	1.21199	1.79768
11.3022	1.32772	1.16273	1.51613
14.8943	1.48596	1.21392	1.81897
9.15015	1.17579	1.05832	1.30631
6.94886	1.05558	0.916884	1.21525
14.8752	1.48533	1.21381	1.8176
14.2865	1.4649	1.20961	1.77408
3.1185	1.19084	1.05588	1.34304
8.01117	1.10085	0.976537	1.241
14.7684	1.48177	1.21313	1.8099
14.2892	1.465	1.20964	1.77428
9.62381	1.21364	1.09159	1.34935
14.0894	1.45763	1.20795	1.75892
3.29372	1.17439	1.04145	1.32431
13.3227	1.42717	1.20003	1.69731
14.3413	1.46689	1.21005	1.77823
14.9025	1.48623	1.21397	1.81956
14.4152	1.46953	1.21063	1.78381
14.3577	1.46748	1.21018	1.77948
10.7984	1.29729	1.14721	1.467
13.2762	1.4252	1.19946	1.69343
10.9928	1.3094	1.15363	1.4862
14.6041	1.47616	1.21201	1.79788
14.3057	1.4656	1.20977	1.77553
14.7465	1.48103	1.21298	1.80831
12.0195	1.36663	1.17959	1.58332
14.7821	1.48223	1.21322	1.81089
0.109517	2.09074	1.46374	2.98632
2.96791	1.20575	1.06827	1.36094
14.7875	1.48241	1.21325	1.81128
4.90089	1.06622	0.925004	1.229
9.96879	1.24012	1.11163	1.38347
14.845	1.48433	1.21362	1.81543
8.66827	1.14083	1.02282	1.27246
13.7307	1.44382	1.20454	1.73062
9.38287	1.19422	1.07519	1.32643
14.0675	1.45681	1.20775	1.75722
12.3152	1.38143	1.1852	1.61014
10.9161	1.30468	1.15117	1.47866
14.2536	1.46371	1.20935	1.77157
7.80309	1.09005	0.963003	1.23386
9.99343	1.24195	1.11292	1.38594
1.92476	1.33635	1.15582	1.54507
14.1825	1.46109	1.20875	1.76611
14.856	1.4847	1.21369	1.81622
14.4371	1.47031	1.21079	1.78546
10.6943	1.29061	1.14351	1.45663
14.2427	1.46331	1.20926	1.77073
14.615	1.47654	1.21209	1.79869
7.86606	1.09323	0.967023	1.2359
10.8997	1.30366	1.15063	1.47704
11.5048	1.33917	1.16804	1.53539
14.5712	1.47502	1.21178	1.79545
4.86529	1.06803	0.927256	1.23017
14.1496	1.45988	1.20847	1.76358
14.281	1.46471	1.20957	1.77366
14.1085	1.45835	1.20812	1.76041
14.7191	1.4801	1.2128	1.80631
2.9022	1.21251	1.07366	1.3693
3.96725	1.12118	0.988946	1.2711
13.435	1.43185	1.20134	1.70659
3.48812	1.15749	1.02575	1.30615
7.57584	1.0793	0.949113	1.22735
1.16636	1.48566	1.23614	1.78555
6.13295	1.03924	0.892633	1.20993
11.3158	1.32851	1.16311	1.51744
14.8012	1.48287	1.21334	1.81227
14.0592	1.4565	1.20768	1.75658
2.69412	1.23495	1.09074	1.39823
14.6671	1.47833	1.21245	1.80251
14.7273	1.48038	1.21286	1.80691
8.45471	1.12687	1.00735	1.26057
14.114	1.45855	1.20816	1.76083
8.11247	1.10644	0.983368	1.24491
14.4398	1.47041	1.21081	1.78566
8.59982	1.13625	1.01783	1.26846
14.3084	1.4657	1.20979	1.77574
14.2071	1.462	1.20896	1.76801
4.17807	1.1072	0.973608	1.25912
10.7683	1.29537	1.14616	1.46401
11.1981	1.32169	1.15982	1.50616
14.0319	1.45547	1.20744	1.75445
12.8491	1.40652	1.19378	1.65718
14.8998	1.48614	1.21396	1.81936
7.79761	1.08978	0.962657	1.23369
14.5302	1.47359	1.21149	1.79241
10.2426	1.25999	1.12508	1.41108
4.90636	1.06595	0.924659	1.22882
14.9901	1.4891	1.2145	1.82579
2.11094	1.30855	1.13944	1.50276
14.7027	1.47954	1.21269	1.80511
13.5199	1.43534	1.2023	1.71355
14.4042	1.46914	1.21054	1.78299
14.8368	1.48406	1.21357	1.81484
3.23897	1.17942	1.04595	1.32993
11.9565	1.36339	1.17831	1.57753
14.166	1.46049	1.20861	1.76485
5.30336	1.04813	0.902078	1.21782
8.58614	1.13535	1.01684	1.26768
14.6753	1.47861	1.21251	1.80311
14.3549	1.46738	1.21016	1.77927
9.39109	1.19489	1.07577	1.32719
11.7293	1.35143	1.17339	1.55648
14.0018	1.45433	1.20716	1.75209
9.62107	1.21343	1.09141	1.34909
14.8642	1.48497	1.21374	1.81681
12.077	1.36956	1.18074	1.58858
3.68525	1.14171	1.01028	1.29023
2.88304	1.21451	1.07524	1.37181
10.4835	1.27665	1.13543	1.43544
12.9066	1.40911	1.1946	1.66213
12.3809	1.38463	1.18635	1.61603
12.2303	1.37725	1.18366	1.6025
0.287482	1.87059	1.42416	2.45698
14.7492	1.48112	1.213	1.8085
13.8402	1.44812	1.20564	1.73936
14.0866	1.45753	1.20792	1.75871
1.4292	1.42549	1.20466	1.68679
5.2486	1.05009	0.904551	1.21904
1.74406	1.36597	1.17254	1.59131
14.3276	1.46639	1.20994	1.7772
8.49578	1.12948	1.01031	1.26272
14.1167	1.45865	1.20819	1.76104
10.2836	1.26288	1.12694	1.41523
2.1657	1.30083	1.13473	1.49123
1.10065	1.5027	1.24498	1.81377
5.51966	1.04227	0.894834	1.21399
9.1392	1.17495	1.05751	1.30543
11.3761	1.33195	1.16472	1.52318
7.76202	1.08803	0.960419	1.23259
8.05498	1.10324	0.979473	1.24265
6.05629	1.03868	0.891651	1.20996
2.43128	1.26593	1.11241	1.44065
1.15267	1.48914	1.23794	1.7913
9.80999	1.22813	1.10287	1.36763
5.62918	1.04035	0.89259	1.21258
8.73398	1.14532	1.02763	1.27649
1.44289	1.42265	1.20316	1.68218
3.63323	1.14575	1.01432	1.2942
0.936371	1.54982	1.26934	1.89229
14.8396	1.48415	1.21358	1.81504
6.3602	1.04196	0.896995	1.21036
2.71328	1.23281	1.08917	1.39541
14.5849	1.4755	1.21188	1.79647
7.58132	1.07955	0.949436	1.2275
12.6437	1.39711	1.19069	1.63931
13.0079	1.41361	1.196	1.6708
14.4124	1.46944	1.21061	1.78361
6.27259	1.04073	0.895072	1.2101
14.2016	1.4618	1.20891	1.76759
0.991129	1.53332	1.26081	1.86472
12.3672	1.38396	1.18612	1.61481
14.5001	1.47254	1.21126	1.79017
1.33063	1.44672	1.21584	1.72145
7.9701	1.09865	0.973811	1.2395
14.0346	1.45557	1.20746	1.75466
8.42186	1.12481	1.005	1.25889
14.3659	1.46777	1.21025	1.7801
11.6444	1.34685	1.17143	1.54854
7.02826	1.05808	0.920399	1.21636
14.1277	1.45906	1.20828	1.76189
14.4918	1.47225	1.2112	1.78955
10.8477	1.3004	1.14889	1.4719
14.5356	1.47378	1.21152	1.79281
3.00898	1.20161	1.06489	1.35588
14.5877	1.47559	1.2119	1.79667
2.97339	1.2052	1.06782	1.36026
2.03428	1.31969	1.1461	1.51957
9.11729	1.17327	1.05591	1.30367
10.0591	1.24679	1.11628	1.39255
9.46227	1.20069	1.08082	1.33386
14.8231	1.4836	1.21348	1.81385
12.7587	1.40242	1.19245	1.64935
1.79608	1.35715	1.16762	1.57743
4.10141	1.11216	0.979124	1.26327
14.3194	1.4661	1.20988	1.77657
1.17457	1.4836	1.23507	1.78213
14.2838	1.4648	1.20959	1.77387
0.908991	1.55841	1.27377	1.90666
14.0182	1.45495	1.20731	1.75338
5.49775	1.04273	0.895393	1.21431
6.60114	1.04644	0.903737	1.21169
14.7848	1.48232	1.21323	1.81109
9.97426	1.24053	1.11191	1.38402
14.5384	1.47388	1.21154	1.79302
8.14259	1.10814	0.985426	1.24614
5.0898	1.05695	0.91329	1.2232
14.1934	1.4615	1.20884	1.76696
0.531158	1.70974	1.35101	2.16373
2.72971	1.23099	1.08782	1.39301
6.45329	1.04351	0.899353	1.21077
14.4343	1.47022	1.21077	1.78525
4.73114	1.07501	0.935873	1.23484
5.34991	1.04662	0.900185	1.21687
2.21224	1.29442	1.13077	1.48175
1.62907	1.38641	1.18374	1.62377
7.48001	1.07511	0.943573	1.22497
11.4856	1.33811	1.16755	1.53357
1.21016	1.4748	1.23049	1.7676
7.23634	1.06535	0.930433	1.21982
0.457234	1.75032	1.37093	2.2347
5.98237	1.03838	0.891008	1.21012
14.3988	1.46895	1.2105	1.78258
14.4727	1.47157	1.21106	1.78812
1.85358	1.34768	1.16229	1.56263
14.6233	1.47682	1.21215	1.79929
13.7416	1.44425	1.20466	1.7315
10.7299	1.29291	1.1448	1.46018
14.6287	1.47701	1.21219	1.7997
2.69959	1.23434	1.09029	1.39742
14.5329	1.47369	1.21151	1.79261
3.66608	1.14319	1.01177	1.29167
14.5192	1.47321	1.21141	1.79159
3.95083	1.12232	0.990163	1.27211
7.58953	1.07992	0.949921	1.22771
6.66685	1.04794	0.905926	1.21221
3.96999	1.12099	0.988743	1.27093
13.2543	1.42428	1.19919	1.6916
5.75238	1.03897	0.891106	1.21138
3.94535	1.1227	0.990569	1.27245
6.70518	1.04886	0.907269	1.21254
4.82423	1.07014	0.929872	1.23156
3.79203	1.13367	1.00209	1.28252
1.24302	1.46689	1.22638	1.75456
2.61198	1.2443	1.09749	1.41074
3.6387	1.14532	1.01389	1.29378
13.5336	1.4359	1.20245	1.71467
13.3857	1.42981	1.20077	1.70253
10.6259	1.28614	1.14098	1.44977
13.3583	1.42866	1.20045	1.70026
11.4062	1.33365	1.16552	1.52604
10.9791	1.30856	1.1532	1.48486
11.6855	1.34907	1.17238	1.55238
13.7855	1.44598	1.2051	1.735
11.0612	1.31356	1.15576	1.49289
9.6375	1.21473	1.09245	1.35068
13.0407	1.41505	1.19645	1.6736
13.0763	1.41661	1.19692	1.67662
5.70584	1.0394	0.891542	1.21179
7.90165	1.09506	0.969325	1.2371
13.3091	1.42659	1.19986	1.69617
13.2269	1.42311	1.19885	1.68931
9.72511	1.22159	1.09787	1.35925
13.3446	1.42809	1.20029	1.69913
7.37871	1.07089	0.937939	1.22268
13.7526	1.44468	1.20477	1.73238
7.80035	1.08992	0.96283	1.23378
13.0599	1.41589	1.1967	1.67523
13.216	1.42264	1.19872	1.6884
13.0435	1.41517	1.19648	1.67383
13.9443	1.45213	1.20663	1.74758
13.9059	1.45066	1.20627	1.74456
12.8518	1.40665	1.19382	1.65741
13.6349	1.44	1.20355	1.7229
5.82357	1.03852	0.890719	1.21085
12.2276	1.37711	1.18361	1.60225
13.5308	1.43579	1.20242	1.71445
13.7991	1.44651	1.20523	1.73609
6.96255	1.056	0.917477	1.21544
13.3118	1.42671	1.19989	1.6964
5.25134	1.04998	0.904421	1.21897
4.12058	1.11091	0.977738	1.26221
1.64823	1.38291	1.18184	1.61819
4.87625	1.06747	0.926562	1.22981
13.4843	1.43388	1.2019	1.71064
13.0243	1.41433	1.19623	1.6722
13.5609	1.43701	1.20275	1.7169
5.95499	1.03832	0.89085	1.2102
13.038	1.41493	1.19641	1.67337
8.86267	1.15438	1.03712	1.2849
13.9224	1.45129	1.20643	1.74586
13.1147	1.41828	1.19742	1.67987
13.0544	1.41565	1.19663	1.67476
13.7334	1.44393	1.20457	1.73084
13.3392	1.42786	1.20022	1.69867
13.0928	1.41733	1.19714	1.67801
7.77023	1.08843	0.960934	1.23284
13.9388	1.45192	1.20658	1.74715
13.9826	1.4536	1.20699	1.75059
13.5418	1.43623	1.20254	1.71534
4.38068	1.09471	0.959365	1.24916
13.2105	1.42241	1.19865	1.68794
9.75523	1.22392	1.09967	1.36221
13.7608	1.44501	1.20485	1.73303
13.78	1.44576	1.20504	1.73456
13.2625	1.42462	1.19929	1.69229
13.665	1.4412	1.20387	1.72533
13.7252	1.4436	1.20449	1.73018
13.3638	1.42889	1.20051	1.70072
13.3802	1.42958	1.20071	1.70207
4.21641	1.10477	0.970876	1.25713
13.5774	1.43768	1.20293	1.71824
8.95028	1.16074	1.04359	1.29103
6.76815	1.05045	0.909577	1.21315
2.89399	1.21336	1.07434	1.37037
13.1557	1.42006	1.19795	1.68333
13.6376	1.44011	1.20358	1.72312
13.2488	1.42404	1.19913	1.69115
12.0879	1.37011	1.18095	1.58957
4.5121	1.08706	0.950387	1.24339
1.73037	1.36833	1.17384	1.59504
13.8621	1.44897	1.20585	1.7411
6.1001	1.03897	0.892175	1.20993
13.7088	1.44295	1.20432	1.72886
13.9169	1.45108	1.20637	1.74543
9.33085	1.19002	1.07145	1.32171
13.9579	1.45266	1.20676	1.74866
9.16384	1.17685	1.05932	1.30742
13.7909	1.44619	1.20515	1.73544
13.0955	1.41745	1.19717	1.67825
11.6718	1.34833	1.17207	1.5511
13.6568	1.44088	1.20378	1.72467
7.52108	1.07688	0.945923	1.22597
1.49491	1.41209	1.19755	1.66507
0.720074	1.62506	1.30808	2.01886
5.60453	1.04073	0.893016	1.21287
13.0818	1.41685	1.19699	1.67709
13.7718	1.44544	1.20496	1.73391
13.6321	1.43989	1.20352	1.72268
9.44584	1.19935	1.07967	1.33231
13.613	1.43912	1.20331	1.72113
2.59555	1.2462	1.09884	1.41332
9.66488	1.21688	1.09417	1.35335
7.47454	1.07487	0.943263	1.22484
6.78458	1.05089	0.9102	1.21332
13.383	1.42969	1.20074	1.7023
13.654	1.44077	1.20375	1.72445
6.52174	1.04479	0.901288	1.21115
12.6547	1.39762	1.19086	1.64027
13.5883	1.43812	1.20305	1.71913
10.3275	1.26595	1.12887	1.41966
11.3268	1.32914	1.1634	1.51848
10.541	1.28052	1.13772	1.44123
8.29865	1.11726	0.996266	1.25294
10.2754	1.26231	1.12657	1.4144
13.6294	1.43978	1.20349	1.72246
13.6622	1.4411	1.20384	1.72511
6.90505	1.05426	0.915022	1.21469
11.3104	1.3282	1.16296	1.51691
13.2735	1.42509	1.19943	1.69321
13.5911	1.43823	1.20308	1.71935
13.936	1.45182	1.20655	1.74694
7.02278	1.0579	0.920151	1.21628
13.6705	1.44142	1.20392	1.72578
5.27051	1.04928	0.903529	1.21854
11.0886	1.3152	1.15659	1.49556
13.3611	1.42878	1.20048	1.70049
2.20403	1.29554	1.13146	1.4834
13.821	1.44737	1.20545	1.73784
0.95006	1.54562	1.26717	1.88525
11.4007	1.33334	1.16537	1.52552
6.916	1.05459	0.915483	1.21483
10.5629	1.28198	1.13857	1.44344
12.5999	1.39506	1.19	1.63546
1.19921	1.47748	1.23189	1.77203
13.3994	1.43038	1.20093	1.70366
12.0825	1.36984	1.18084	1.58908
8.9804	1.16296	1.04582	1.29322
13.9552	1.45255	1.20673	1.74845
13.5938	1.43834	1.20311	1.71957
10.0263	1.24438	1.11462	1.38924
12.129	1.37219	1.18175	1.59332
9.59095	1.21104	1.08947	1.34617
13.8868	1.44992	1.20609	1.74305
13.8265	1.44758	1.2055	1.73827
10.4069	1.27143	1.13227	1.42769
8.88183	1.15576	1.03854	1.28621
12.1619	1.37384	1.18237	1.5963
13.6157	1.43923	1.20334	1.72135
13.5582	1.4369	1.20272	1.71668
13.2461	1.42393	1.19909	1.69092
12.6301	1.39647	1.19048	1.63811
13.1694	1.42065	1.19813	1.68449
13.0736	1.41649	1.19688	1.67639
13.8484	1.44843	1.20572	1.74001
2.49151	1.25855	1.10742	1.4303
13.5555	1.43679	1.20269	1.71646
13.8785	1.4496	1.20601	1.7424
7.63334	1.08192	0.952531	1.22888
7.2911	1.06742	0.933261	1.22087
13.6677	1.44131	1.20389	1.72556
13.7471	1.44447	1.20471	1.73194
13.6869	1.44208	1.20409	1.7271
6.49436	1.04426	0.900494	1.21099
13.5746	1.43757	1.2029	1.71802
13.2433	1.42381	1.19906	1.69069
13.6513	1.44066	1.20372	1.72423
2.35462	1.2756	1.11879	1.4544
13.1393	1.41935	1.19774	1.68195
13.1941	1.4217	1.19844	1.68656
7.22265	1.06484	0.929738	1.21957
13.0517	1.41553	1.19659	1.67453
8.12343	1.10706	0.984115	1.24536
5.92213	1.0383	0.890718	1.21033
13.4213	1.43129	1.20119	1.70547
13.9251	1.4514	1.20645	1.74608
13.5965	1.43846	1.20314	1.7198
4.25747	1.1022	0.967968	1.25505
6.00701	1.03845	0.891188	1.21005
13.8074	1.44683	1.20531	1.73675
13.4733	1.43343	1.20178	1.70974
12.2988	1.38062	1.1849	1.60867
13.2132	1.42252	1.19868	1.68817
13.0051	1.41349	1.19597	1.67057
12.2331	1.37738	1.18371	1.60275
13.6732	1.44153	1.20395	1.726
13.4788	1.43366	1.20184	1.71019
0.985653	1.53493	1.26165	1.86741
13.2297	1.42323	1.19889	1.68954
4.95838	1.06335	0.921397	1.22716
5.74964	1.039	0.891127	1.2114
13.0216	1.41421	1.19619	1.67197
6.93517	1.05516	0.916296	1.21507
13.153	1.41994	1.19792	1.6831
13.0572	1.41577	1.19667	1.675
13.5692	1.43735	1.20284	1.71757
5.69489	1.03952	0.891666	1.21189
2.91863	1.2108	1.07232	1.36718
13.1503	1.41982	1.19788	1.68287
13.9196	1.45119	1.2064	1.74564
13.9525	1.45245	1.20671	1.74823
7.04468	1.05862	0.921148	1.2166
8.77231	1.14799	1.03045	1.27892
13.843	1.44822	1.20566	1.73958
13.1886	1.42147	1.19837	1.6861
13.9634	1.45287	1.20681	1.74909
11.7731	1.35376	1.17437	1.56056
6.64495	1.04743	0.90518	1.21203
7.55941	1.07857	0.94815	1.22693
13.769	1.44533	1.20493	1.73369
4.49567	1.088	0.951498	1.24409
4.76399	1.07328	0.933743	1.23366
3.58394	1.14966	1.01818	1.29812
13.6951	1.44241	1.20418	1.72776
13.1119	1.41816	1.19739	1.67964
12.5452	1.39248	1.18912	1.63063
13.8457	1.44833	1.20569	1.7398
7.0173	1.05773	0.919903	1.2162
8.06867	1.104	0.980397	1.24318
6.04534	1.03862	0.891536	1.20998
13.2817	1.42544	1.19953	1.69389
12.0852	1.36997	1.1809	1.58932
11.6334	1.34625	1.17117	1.54751
13.498	1.43445	1.20206	1.71176
13.8375	1.44801	1.20561	1.73914
13.3282	1.4274	1.20009	1.69776
13.2926	1.4259	1.19966	1.6948
1.91929	1.33721	1.15632	1.54639
12.8546	1.40677	1.19386	1.65765
8.28223	1.11627	0.995112	1.25219
6.45055	1.04346	0.899279	1.21075
0.922681	1.55409	1.27154	1.89942
11.4527	1.33627	1.16672	1.53046
11.2255	1.32329	1.1606	1.50879
13.8594	1.44886	1.20582	1.74088
1.26218	1.46236	1.22402	1.74712
11.001	1.3099	1.15389	1.48701
13.0325	1.41469	1.19634	1.6729
10.6779	1.28954	1.14291	1.45498
10.5438	1.2807	1.13783	1.44151
10.6998	1.29097	1.14371	1.45717
4.28212	1.10068	0.966233	1.25383
13.2078	1.42229	1.19861	1.68771
13.9607	1.45276	1.20678	1.74888
0.112255	2.08565	1.46427	2.97071
13.55	1.43657	1.20263	1.71601
7.51287	1.07652	0.94545	1.22577
8.72851	1.14495	1.02723	1.27615
13.0188	1.41409	1.19615	1.67174
13.2652	1.42474	1.19933	1.69252
10.3932	1.27049	1.1317	1.42631
7.97832	1.09909	0.974354	1.23979
13.1065	1.41792	1.19732	1.67917
8.04676	1.10279	0.978921	1.24234
2.382	1.27211	1.1165	1.44941
13.9771	1.45339	1.20694	1.75016
6.98992	1.05685	0.91868	1.21581
1.35254	1.44188	1.2133	1.71352
4.13701	1.10984	0.976554	1.26132
3.31289	1.17266	1.03988	1.3224
7.45537	1.07406	0.942181	1.2244
8.52864	1.1316	1.01267	1.26449
8.47114	1.12791	1.00853	1.26142
5.02136	1.06025	0.917489	1.22522
0.14511	2.03101	1.4647	2.8163
7.91261	1.09562	0.970038	1.23747
9.50334	1.20402	1.08364	1.33776
13.6924	1.4423	1.20415	1.72754
13.3693	1.42912	1.20058	1.70117
6.0207	1.03851	0.891303	1.21002
10.656	1.28811	1.14211	1.45279
0.208082	1.94907	1.45019	2.61957
13.7663	1.44522	1.20491	1.73347
9.48691	1.20269	1.08252	1.3362
9.86748	1.23251	1.10613	1.37334
13.7061	1.44284	1.20429	1.72864
3.14314	1.18847	1.05385	1.34028
3.04731	1.1978	1.06174	1.35129
13.0791	1.41673	1.19696	1.67685
13.7499	1.44457	1.20474	1.73216
13.9032	1.45055	1.20624	1.74435
13.1585	1.42017	1.19799	1.68356
9.01051	1.1652	1.04804	1.29545
12.6328	1.3966	1.19052	1.63835
8.03307	1.10204	0.978002	1.24182
13.728	1.44371	1.20452	1.7304
8.79148	1.14933	1.03187	1.28016
13.9744	1.45328	1.20691	1.74995
12.4165	1.38634	1.18697	1.61921
12.474	1.3891	1.18794	1.62433
13.7115	1.44306	1.20435	1.72908
13.3063	1.42648	1.19983	1.69594
3.43062	1.16234	1.03035	1.31125
13.2707	1.42497	1.19939	1.69298
6.4615	1.04365	0.899577	1.21081
3.28277	1.17539	1.04234	1.32542
13.2899	1.42578	1.19963	1.69457
5.83178	1.03849	0.890696	1.2108
10.8066	1.29781	1.14749	1.46782
13.2516	1.42416	1.19916	1.69138
9.2405	1.18284	1.06491	1.31382
13.9333	1.45171	1.20653	1.74672
13.8566	1.44875	1.2058	1.74066
2.98708	1.20381	1.06669	1.35856
13.5144	1.43512	1.20224	1.71311
5.57442	1.04123	0.893599	1.21324
13.2351	1.42346	1.19896	1.69
13.0626	1.41601	1.19674	1.67546
2.58186	1.2478	1.09997	1.41549
13.32	1.42705	1.19999	1.69708
6.61209	1.04669	0.904092	1.21177
7.70179	1.08512	0.956687	1.23081
3.7756	1.13488	1.00335	1.28367
13.3474	1.4282	1.20032	1.69935
12.6273	1.39634	1.19043	1.63787
6.25068	1.04046	0.894638	1.21005
13.205	1.42217	1.19858	1.68748
13.7882	1.44608	1.20512	1.73522
2.39021	1.27107	1.11582	1.44793
6.94612	1.0555	0.916766	1.21522
13.3939	1.43015	1.20087	1.70321
8.0276	1.10175	0.977635	1.24161
1.87274	1.34459	1.16054	1.55782
3.27456	1.17614	1.04302	1.32625
6.27806	1.0408	0.895184	1.21011
13.4076	1.43072	1.20103	1.70434
8.71482	1.144	1.02623	1.2753
2.76257	1.22738	1.08512	1.38829
13.8293	1.44769	1.20553	1.73849
13.7444	1.44436	1.20468	1.73172
3.14861	1.18794	1.0534	1.33967
11.8224	1.35638	1.17546	1.56514
4.40258	1.09342	0.957855	1.24816
0.161538	2.00726	1.46215	2.7556
8.10152	1.10583	0.982623	1.24448
7.14325	1.06197	0.925801	1.21817
13.4761	1.43355	1.20181	1.70997
10.9846	1.3089	1.15337	1.4854
1.30051	1.45351	1.21939	1.73257
6.51079	1.04458	0.900967	1.21108
4.78589	1.07213	0.932331	1.23289
8.55054	1.13302	1.01426	1.26569
7.34038	1.06935	0.93587	1.22187
13.8238	1.44748	1.20548	1.73806
2.55448	1.25101	1.10222	1.41989
4.99671	1.06145	0.919013	1.22597
13.5527	1.43668	1.20266	1.71623
1.12529	1.4962	1.24161	1.803
13.3036	1.42636	1.19979	1.69572
2.17391	1.29969	1.13403	1.48954
5.65108	1.04005	0.892248	1.21234
10.3548	1.26785	1.13006	1.42243
10.771	1.29554	1.14625	1.46428
11.3925	1.33288	1.16516	1.52474
13.09	1.41721	1.1971	1.67778
12.3891	1.38502	1.1865	1.61677
3.89333	1.12635	0.994448	1.27574
10.5054	1.27813	1.13631	1.43765
8.92016	1.15854	1.04137	1.28889
10.4096	1.27162	1.13239	1.42797
13.2324	1.42334	1.19892	1.68977
5.07338	1.05773	0.914293	1.22368
9.23502	1.18241	1.06451	1.31335
13.4952	1.43433	1.20203	1.71154
13.3775	1.42946	1.20068	1.70185
13.6759	1.44164	1.20398	1.72622
11.743	1.35216	1.1737	1.55775
13.4186	1.43117	1.20115	1.70524
5.57168	1.04127	0.893655	1.21328
10.667	1.28883	1.14251	1.45389
13.3501	1.42832	1.20035	1.69958
13.6184	1.43934	1.20337	1.72157
13.4158	1.43106	1.20112	1.70501
5.13087	1.05501	0.910812	1.22203
1.89738	1.34066	1.1583	1.55173
0.262841	1.89281	1.43245	2.50111
5.67846	1.03971	0.891868	1.21205
0.961012	1.54229	1.26545	1.8797
11.3816	1.33226	1.16487	1.5237
12.9504	1.41106	1.19521	1.66589
7.61417	1.08104	0.951384	1.22836
13.4651	1.4331	1.20169	1.70907
7.50192	1.07605	0.944822	1.2255
13.424	1.4314	1.20122	1.70569
9.46775	1.20114	1.0812	1.33438
11.1434	1.31846	1.15822	1.50087
11.9839	1.3648	1.17887	1.58005
3.8769	1.12752	0.99568	1.27681
5.3636	1.0462	0.899665	1.2166
8.25485	1.11465	0.993195	1.25095
13.2872	1.42567	1.1996	1.69435
13.4624	1.43298	1.20166	1.70884
13.4569	1.43276	1.20159	1.70839
5.67572	1.03974	0.891904	1.21208
0.640675	1.65791	1.32487	2.07467
6.6203	1.04687	0.904361	1.21183
13.4596	1.43287	1.20162	1.70862
6.42865	1.04307	0.898698	1.21065
2.53806	1.25296	1.10358	1.42257
7.00361	1.05729	0.919289	1.21601
13.8676	1.44918	1.2059	1.74153
10.8449	1.30023	1.1488	1.47163
13.9141	1.45098	1.20635	1.74521
8.57518	1.13463	1.01604	1.26706
6.43686	1.04322	0.898914	1.21068
0.405213	1.78243	1.38618	2.29197
9.20217	1.17983	1.06212	1.31059
8.12069	1.1069	0.983928	1.24525
11.3624	1.33117	1.16436	1.52188
12.7669	1.40279	1.19257	1.65006
6.37663	1.04222	0.897388	1.21042
12.7533	1.40216	1.19237	1.64887
12.5561	1.393	1.1893	1.6316
0.421641	1.77193	1.38125	2.27311
12.192	1.37534	1.18294	1.59903
0.81864	1.58854	1.2893	1.95722
10.7956	1.29712	1.14711	1.46673
4.25474	1.10237	0.968161	1.25519
5.76607	1.03887	0.891005	1.21127
8.6272	1.13807	1.01982	1.27004
3.57299	1.15054	1.01904	1.29901
5.63465	1.04028	0.892501	1.21252
12.86	1.40702	1.19394	1.65812
4.4108	1.09293	0.95729	1.24779
12.7122	1.40028	1.19175	1.6453
3.51276	1.15545	1.02379	1.30403
11.4692	1.33719	1.16714	1.53202
9.88391	1.23376	1.10704	1.37498
2.01511	1.32254	1.14778	1.52391
11.68	1.34877	1.17226	1.55187
11.0229	1.31124	1.15458	1.48915
4.27664	1.10102	0.966618	1.2541
11.6389	1.34655	1.1713	1.54802
7.09123	1.06017	0.923313	1.21732
12.6684	1.39825	1.19108	1.64147
12.7149	1.4004	1.19179	1.64553
11.2556	1.32504	1.16145	1.51168
12.9257	1.40996	1.19487	1.66378
11.5486	1.3416	1.16912	1.53952
7.68536	1.08435	0.955681	1.23033
10.5821	1.28325	1.13932	1.44537
11.6417	1.3467	1.17136	1.54828
11.1379	1.31814	1.15806	1.50034
10.6587	1.28829	1.14221	1.45306
11.1954	1.32153	1.15974	1.50589
12.2933	1.38035	1.1848	1.60818
7.71	1.08552	0.957192	1.23104
4.3314	1.09767	0.962785	1.25146
12.1728	1.37438	1.18258	1.59729
3.44705	1.16094	1.02903	1.30977
8.46293	1.12739	1.00794	1.26099
4.06582	1.11451	0.981709	1.26528
11.2529	1.32488	1.16137	1.51141
12.1153	1.3715	1.18148	1.59207
1.59073	1.39353	1.1876	1.63518
4.64626	1.07958	0.941431	1.23801
10.3302	1.26614	1.12899	1.41994
2.51615	1.25558	1.10538	1.42618
3.87143	1.12791	0.996091	1.27716
0.733764	1.61973	1.30534	2.00983
10.1687	1.25472	1.12164	1.4036
8.80243	1.1501	1.03267	1.28088
12.9449	1.41082	1.19514	1.66542
10.322	1.26556	1.12863	1.41911
5.02683	1.05998	0.917151	1.22506
11.2392	1.32409	1.16098	1.5101
11.6362	1.3464	1.17123	1.54777
9.1611	1.17664	1.05912	1.3072
[truncated: 3,888 more rows]

## Sheet: heart_failure
time(year)	hr	hr_lci	hr_uci
6.14117	0.998084	0.793321	1.2557
16.6192	1.45993	1.04215	2.04521
16.1236	1.44644	1.04703	1.99821
16.945	1.46797	1.03863	2.07478
10.7464	1.17356	0.99844	1.37939
16.0306	1.44374	1.04788	1.98913
16.9094	1.46712	1.03902	2.07159
16.2523	1.45009	1.04582	2.01064
16.0223	1.4435	1.04796	1.98832
16.6055	1.45958	1.04229	2.04394
16.1373	1.44684	1.04691	1.99954
16.1127	1.44613	1.04714	1.99715
16.6986	1.46195	1.04131	2.05252
16.6493	1.4607	1.04183	2.04799
16.3701	1.45334	1.04468	2.02188
16.9861	1.46895	1.03818	2.07845
16.789	1.4642	1.04034	2.06075
16.8985	1.46686	1.03914	2.07061
16.0661	1.44478	1.04756	1.99261
16.8738	1.46627	1.03942	2.06841
16.1209	1.44636	1.04706	1.99795
16.1017	1.44581	1.04724	1.99608
16.2441	1.44986	1.0459	2.00985
16.4933	1.45665	1.04344	2.03349
16.6028	1.45951	1.04232	2.04369
16.0689	1.44486	1.04754	1.99288
5.20753	1.05743	0.857417	1.30409
16.8519	1.46574	1.03966	2.06644
8.96123	1.03459	0.862561	1.24093
16.5672	1.45859	1.04269	2.04039
10.1248	1.11822	0.955563	1.30856
16.1291	1.4466	1.04698	1.99874
13.1284	1.33074	1.05739	1.67474
16.5453	1.45802	1.04291	2.03835
8.10974	0.992661	0.802282	1.22822
16.9259	1.46751	1.03884	2.07306
16.7917	1.46427	1.04031	2.061
16.2578	1.45025	1.04577	2.01117
16.4549	1.45563	1.04383	2.02989
15.0723	1.41271	1.05517	1.89138
16.7725	1.4638	1.04052	2.05926
16.2605	1.45032	1.04574	2.01143
16.9122	1.46718	1.03899	2.07184
16.4823	1.45636	1.04355	2.03247
16.4878	1.45651	1.0435	2.03298
9.695	1.08394	0.921854	1.27453
16.1182	1.44629	1.04709	1.99768
16.4851	1.45643	1.04353	2.03272
2.18213	1.51535	1.18062	1.945
8.11521	0.992872	0.802611	1.22824
16.7534	1.46332	1.04073	2.05752
16.1428	1.44699	1.04686	2.00007
16.6548	1.46084	1.04177	2.04849
10.4616	1.14781	0.980168	1.34413
16.1592	1.44746	1.0467	2.00167
16.0634	1.4447	1.04759	1.99234
2.65031	1.40402	1.11807	1.7631
4.24926	1.14921	0.942437	1.40134
13.1749	1.33304	1.05764	1.68015
16.8492	1.46567	1.03969	2.06619
16.0442	1.44414	1.04776	1.99047
8.60804	1.01506	0.835642	1.23301
16.0853	1.44534	1.04739	1.99448
12.4055	1.29215	1.05046	1.58946
12.0441	1.2705	1.04427	1.54575
16.9067	1.46705	1.03905	2.07135
2.89125	1.35532	1.08923	1.68641
11.1187	1.20475	1.0168	1.42744
10.6232	1.16259	0.991017	1.36387
16.8465	1.4656	1.03972	2.06594
12.7067	1.30891	1.05412	1.62528
16.099	1.44573	1.04726	1.99581
16.8547	1.4658	1.03963	2.06668
16.5891	1.45916	1.04246	2.04242
16.6658	1.46112	1.04166	2.0495
16.6247	1.46007	1.04209	2.04572
14.5795	1.39446	1.05767	1.83849
16.7342	1.46284	1.04093	2.05577
16.0278	1.44366	1.04791	1.98886
16.2797	1.45086	1.04556	2.01327
16.444	1.45534	1.04394	2.02886
16.2167	1.44909	1.04616	2.00722
13.613	1.35382	1.05907	1.7306
12.0359	1.26999	1.0441	1.54474
16.0059	1.44301	1.04811	1.98671
16.6083	1.45965	1.04226	2.0442
16.5261	1.45752	1.04311	2.03656
4.77494	1.09374	0.892715	1.34003
8.56149	1.01271	0.832263	1.23228
16.3153	1.45184	1.04521	2.01667
16.8684	1.46613	1.03948	2.06791
2.39842	1.4608	1.15039	1.85496
16.2742	1.45071	1.04561	2.01274
0.13142	3.24441	1.69931	6.1944
16.1045	1.44589	1.04721	1.99635
16.2961	1.45131	1.0454	2.01484
16.507	1.45701	1.0433	2.03477
16.0908	1.44549	1.04734	1.99501
4.55865	1.11483	0.912152	1.36255
5.65655	1.02624	0.824854	1.27679
12.2604	1.28369	1.04822	1.57205
12.0715	1.27222	1.04481	1.54912
14.4562	1.38964	1.05813	1.82503
16.5042	1.45694	1.04333	2.03452
16.0415	1.44406	1.04779	1.9902
9.61833	1.07825	0.915674	1.2697
16.3892	1.45386	1.04449	2.02369
16.7944	1.46433	1.04028	2.06124
16.7506	1.46325	1.04075	2.05727
8.12069	0.993084	0.80294	1.22826
14.9573	1.40859	1.05584	1.87919
16.277	1.45078	1.04559	2.013
9.84011	1.09504	0.933418	1.28465
16.663	1.46105	1.04169	2.04925
14.4179	1.38813	1.05826	1.82082
16.8081	1.46467	1.04013	2.06248
7.28014	0.971209	0.766305	1.2309
16.1839	1.44816	1.04647	2.00405
15.5733	1.42965	1.05172	1.9434
8.63542	1.01647	0.837651	1.23347
16.3728	1.45342	1.04465	2.02214
16.8903	1.46666	1.03924	2.06988
2.68864	1.39593	1.11337	1.75021
16.8163	1.46487	1.04004	2.06323
10.4479	1.14657	0.979211	1.34252
4.03844	1.1755	0.964446	1.43274
5.54978	1.03315	0.832274	1.28251
13.7964	1.36206	1.05924	1.75146
16.5836	1.45902	1.04252	2.04191
12.9997	1.32426	1.05659	1.65973
16.5781	1.45887	1.04257	2.04141
10.4863	1.15006	0.981879	1.34705
16.392	1.45394	1.04446	2.02395
16.2359	1.44963	1.04598	2.00906
16.1811	1.44809	1.0465	2.00378
16.8957	1.46679	1.03917	2.07037
16.1264	1.44652	1.04701	1.99848
16.5124	1.45716	1.04325	2.03529
15.2256	1.41806	1.05421	1.9075
16.6356	1.46036	1.04197	2.04673
16.3126	1.45177	1.04524	2.01641
15.5186	1.42788	1.05214	1.93781
2.664	1.40111	1.11638	1.75846
12.6492	1.30579	1.05351	1.61847
16.7397	1.46298	1.04087	2.05627
9.74154	1.08745	0.925584	1.27763
7.55394	0.975799	0.774784	1.22896
16.7999	1.46447	1.04022	2.06174
16.1401	1.44691	1.04688	1.99981
16.5809	1.45895	1.04254	2.04166
3.54561	1.24411	1.01663	1.5225
9.60191	1.07705	0.914345	1.26871
11.0393	1.19834	1.01334	1.41712
4.19176	1.1562	0.948412	1.40952
2.39568	1.46145	1.15075	1.85603
16.5617	1.45845	1.04274	2.03988
16.8382	1.4654	1.03981	2.0652
16.1072	1.44597	1.04719	1.99661
11.8744	1.25961	1.04063	1.52466
15.0832	1.41309	1.05511	1.89254
11.5431	1.23688	1.03193	1.48253
9.71964	1.08579	0.923831	1.27615
16.7013	1.46202	1.04128	2.05277
16.162	1.44754	1.04668	2.00193
16.1455	1.44707	1.04683	2.00034
15.3077	1.42087	1.05366	1.91607
16.1757	1.44793	1.04655	2.00326
16.5508	1.45816	1.04286	2.03886
16.2386	1.44971	1.04595	2.00933
14.7328	1.40031	1.057	1.85512
16.7369	1.46291	1.0409	2.05602
16.2551	1.45017	1.0458	2.0109
2.31355	1.4815	1.16193	1.88897
2.16022	1.52122	1.18384	1.95476
7.62786	0.977488	0.777704	1.22859
16.9806	1.46881	1.03824	2.07796
16.3345	1.45237	1.04503	2.01849
9.20764	1.04988	0.882282	1.24931
16.3536	1.4529	1.04484	2.02032
16.5864	1.45909	1.04249	2.04217
7.10492	0.969995	0.763246	1.23275
8.93933	1.0333	0.860837	1.24031
16.0607	1.44462	1.04761	1.99207
15.5131	1.4277	1.05218	1.93725
16.3755	1.45349	1.04462	2.0224
16.1565	1.44738	1.04673	2.0014
16.4741	1.45614	1.04364	2.0317
3.23623	1.29334	1.05023	1.59274
16.0333	1.44382	1.04786	1.98939
3.12397	1.31261	1.06269	1.62131
13.9881	1.3704	1.05917	1.77307
16.6849	1.46161	1.04146	2.05126
12.975	1.323	1.05642	1.65685
6.32461	0.988593	0.782195	1.24945
16.7315	1.46278	1.04096	2.05552
16.5425	1.45795	1.04294	2.0381
16.5398	1.45788	1.04297	2.03784
16.5316	1.45766	1.04305	2.03708
7.4718	0.974139	0.771842	1.22946
16.548	1.45809	1.04288	2.03861
16.6603	1.46098	1.04172	2.049
5.17194	1.06016	0.860162	1.30665
16.6959	1.46188	1.04134	2.05226
16.11	1.44605	1.04716	1.99688
16.5097	1.45709	1.04328	2.03503
10.7573	1.17452	0.999064	1.38079
16.6931	1.46181	1.04137	2.05201
7.27741	0.971178	0.766241	1.23093
6.20688	0.994619	0.789288	1.25337
2.65579	1.40285	1.11739	1.76124
4.84339	1.08751	0.88683	1.33359
7.60048	0.976841	0.776594	1.22872
7.24455	0.970833	0.76551	1.23123
8.93111	1.03282	0.860192	1.24008
15.806	1.43699	1.04984	1.9669
16.047	1.44422	1.04774	1.99074
13.0654	1.32759	1.05702	1.66741
14.9107	1.4069	1.0561	1.87422
16.778	1.46393	1.04046	2.05976
5.09802	1.06596	0.865948	1.31218
16.9642	1.46842	1.03842	2.07649
7.86332	0.984037	0.788592	1.22792
1.08969	1.93603	1.4106	2.65716
3.12945	1.31165	1.06208	1.61987
16.2715	1.45063	1.04564	2.01248
14.2646	1.38195	1.0587	1.80391
16.8766	1.46633	1.03939	2.06865
16.904	1.46699	1.03908	2.0711
11.9428	1.26406	1.04216	1.53321
14.2783	1.38251	1.05866	1.80542
12.2221	1.28141	1.04757	1.56744
12.3946	1.29152	1.0503	1.58815
10.8258	1.18046	1.00284	1.38953
16.674	1.46133	1.04157	2.05026
3.30194	1.28243	1.04301	1.57681
15.2639	1.41938	1.05395	1.9115
6.88315	0.970944	0.762734	1.23599
16.9724	1.46862	1.03833	2.07723
14.9765	1.40928	1.05574	1.88123
14.4973	1.39126	1.05798	1.82953
15.1051	1.41387	1.05497	1.89485
1.30599	1.82355	1.34851	2.46593
9.19395	1.04899	0.881174	1.24878
16.8711	1.4662	1.03945	2.06816
16.203	1.44871	1.04629	2.0059
16.6411	1.4605	1.04192	2.04723
13.8731	1.36543	1.05924	1.76012
16.4358	1.45512	1.04402	2.02809
16.5699	1.45866	1.04266	2.04064
1.62359	1.69066	1.27591	2.24023
8.99135	1.03639	0.86494	1.24182
16.2633	1.4504	1.04572	2.01169
4.14522	1.16197	0.953271	1.41636
16.1483	1.44715	1.04681	2.0006
15.7513	1.43529	1.0503	1.96141
7.01183	0.970034	0.762543	1.23398
14.8204	1.40358	1.05657	1.86455
16.3974	1.45409	1.04441	2.02447
16.9423	1.4679	1.03866	2.07453
8.44924	1.00724	0.824313	1.23077
16.6767	1.4614	1.04154	2.05051
16.3208	1.45199	1.04516	2.01719
16.2934	1.45124	1.04543	2.01458
2.19855	1.51099	1.17822	1.93776
16.559	1.45838	1.04277	2.03963
16.2003	1.44863	1.04632	2.00564
16.3372	1.45245	1.045	2.01876
16.4139	1.45453	1.04424	2.02602
10.834	1.18116	1.00328	1.39058
1.27861	1.83663	1.3557	2.48816
16.4522	1.45556	1.04386	2.02964
16.6575	1.46091	1.04174	2.04874
4.14796	1.16163	0.952985	1.41595
16.0716	1.44494	1.04751	1.99314
16.83	1.46521	1.0399	2.06446
16.8355	1.46534	1.03984	2.06496
16.8136	1.4648	1.04007	2.06298
16.1866	1.44824	1.04645	2.00431
16.7807	1.464	1.04043	2.06
16.9532	1.46816	1.03854	2.07551
15.4282	1.42491	1.0528	1.92853
13.446	1.34609	1.05871	1.71147
9.38835	1.06192	0.896975	1.25721
16.2332	1.44956	1.04601	2.0088
16.4686	1.456	1.04369	2.03118
16.7233	1.46257	1.04105	2.05477
16.0826	1.44526	1.04741	1.99421
6.97076	0.970213	0.762453	1.23459
6.8941	0.970826	0.762663	1.23581
8.16176	0.994699	0.805438	1.22843
16.5645	1.45852	1.04271	2.04014
16.9888	1.46901	1.03815	2.07869
8.35067	1.0027	0.817586	1.22974
16.6274	1.46014	1.04206	2.04597
9.83463	1.09461	0.932985	1.28424
16.7178	1.46243	1.04111	2.05427
13.9004	1.36662	1.05923	1.76321
2.10273	1.53696	1.19245	1.98099
16.3509	1.45282	1.04487	2.02006
16.7616	1.46352	1.04064	2.05826
4.45461	1.1258	0.921991	1.37466
16.9834	1.46888	1.03821	2.0782
5.45942	1.03923	0.838703	1.28771
1.97131	1.57484	1.21309	2.04447
11.9374	1.26371	1.04204	1.53253
12.6465	1.30564	1.05348	1.61815
4.64352	1.10629	0.904367	1.3533
4.58055	1.11259	0.910123	1.36011
16.6822	1.46154	1.04148	2.05101
2.26153	1.49463	1.1692	1.91064
3.07195	1.32182	1.06853	1.63515
7.77845	0.981477	0.784402	1.22807
3.3786	1.27002	1.03465	1.55893
10.9024	1.18699	1.00682	1.39939
13.2789	1.33813	1.05813	1.69222
2.05344	1.55084	1.20002	2.00421
14.5055	1.39158	1.05795	1.83042
5.14456	1.06229	0.862291	1.30867
13.3008	1.33918	1.05822	1.69475
16.3317	1.4523	1.04505	2.01823
16.2195	1.44917	1.04614	2.00748
8.63268	1.01633	0.837449	1.23343
13.1393	1.33128	1.05745	1.67602
10.3658	1.13917	0.973389	1.33319
14.1222	1.37607	1.05899	1.78808
13.1503	1.33182	1.05751	1.67729
12.6246	1.30444	1.05324	1.61555
4.57507	1.11315	0.910629	1.36071
8.3452	1.00246	0.817219	1.22969
16.1976	1.44855	1.04634	2.00537
4.01106	1.17904	0.967317	1.4371
7.73464	0.980243	0.782354	1.22819
5.5224	1.03497	0.834208	1.28405
15.4693	1.42627	1.0525	1.93276
14.6753	1.39813	1.05726	1.8489
8.97218	1.03524	0.863425	1.24125
15.6226	1.43124	1.05133	1.94842
10.489	1.15031	0.982068	1.34737
8.85171	1.02823	0.854004	1.238
16.4659	1.45592	1.04372	2.03092
12.4329	1.29372	1.05084	1.59274
13.4514	1.34635	1.05873	1.7121
15.0613	1.41232	1.05524	1.89023
14.5904	1.39488	1.05762	1.83968
16.4276	1.4549	1.04411	2.02732
16.0032	1.44293	1.04813	1.98644
11.5376	1.23649	1.03177	1.48183
16.1948	1.44848	1.04637	2.00511
10.3959	1.14187	0.97554	1.33656
16.2222	1.44925	1.04611	2.00775
9.25419	1.05291	0.886056	1.25119
0.0136896	4.24647	0.711786	25.3342
14.9545	1.40849	1.05586	1.8789
10.4589	1.14756	0.979977	1.34381
14.2482	1.38128	1.05874	1.80209
8.50674	1.01	0.828349	1.2315
13.4432	1.34596	1.0587	1.71116
16.3564	1.45297	1.04481	2.02058
12.8819	1.31819	1.05571	1.64593
11.1543	1.20758	1.01827	1.43208
10.2891	1.13238	0.967832	1.32491
16.5234	1.45745	1.04314	2.03631
16.318	1.45192	1.04519	2.01693
16.9669	1.46849	1.03839	2.07674
16.1784	1.44801	1.04652	2.00352
6.92969	0.970495	0.762503	1.23522
3.26908	1.28785	1.04661	1.5847
14.3768	1.38649	1.05838	1.8163
14.0456	1.37284	1.05911	1.77951
16.2058	1.44879	1.04627	2.00616
4.16439	1.15959	0.951269	1.41352
7.23086	0.970706	0.765227	1.23136
4.65721	1.10495	0.90313	1.35186
7.61965	0.977291	0.777368	1.22863
14.9436	1.40809	1.05592	1.87773
12.6766	1.30728	1.0538	1.62172
10.6916	1.16873	0.995234	1.37246
12.6191	1.30414	1.05318	1.6149
9.70321	1.08456	0.922514	1.27506
13.3666	1.34233	1.05846	1.70233
12.7916	1.31344	1.05494	1.6353
9.84832	1.09568	0.934067	1.28526
15.5103	1.42761	1.0522	1.93697
15.1188	1.41435	1.05489	1.89629
16.6384	1.46043	1.04195	2.04698
16.2249	1.44933	1.04608	2.00801
14.407	1.38769	1.05829	1.81962
16.4303	1.45497	1.04408	2.02757
9.56357	1.07426	0.911238	1.26646
8.90647	1.03138	0.858262	1.23941
6.56828	0.977926	0.769679	1.24252
6.84755	0.971382	0.763041	1.23661
16.6794	1.46147	1.04151	2.05076
15.409	1.42427	1.05294	1.92656
16.0798	1.44518	1.04744	1.99395
14.3358	1.38484	1.05851	1.81178
11.9976	1.26757	1.04332	1.54001
11.3843	1.22527	1.02686	1.462
9.47596	1.06801	0.904114	1.26163
11.1954	1.21082	1.01993	1.43743
9.70595	1.08476	0.922734	1.27524
10.0619	1.11294	0.950747	1.3028
8.30139	1.00053	0.814318	1.22931
11.5595	1.23805	1.03242	1.48465
6.52721	0.979394	0.771344	1.24356
3.41967	1.26351	1.03019	1.54966
10.4014	1.14236	0.975929	1.33718
16.8109	1.46474	1.0401	2.06273
9.21312	1.05023	0.882726	1.24953
16.8191	1.46494	1.04001	2.06347
11.1324	1.20584	1.01737	1.42923
16.0251	1.44358	1.04793	1.98859
16.715	1.46236	1.04114	2.05402
10.27	1.1307	0.966425	1.3229
9.24324	1.0522	0.885168	1.25074
16.9341	1.46771	1.03875	2.0738
2.28343	1.48906	1.16612	1.90143
14.3111	1.38384	1.05857	1.80905
12.9915	1.32384	1.05654	1.65877
16.2824	1.45093	1.04553	2.01353
6.16581	0.996776	0.791802	1.25481
6.4177	0.984007	0.776735	1.24659
5.8619	1.01371	0.811085	1.26695
4.7722	1.09399	0.892953	1.3403
16.4467	1.45541	1.04391	2.02912
15.984	1.44236	1.0483	1.98455
12.4932	1.29714	1.05165	1.59993
8.79696	1.02515	0.849789	1.2367
3.4799	1.25412	1.02369	1.53643
6.98719	0.970129	0.762472	1.23434
16.7698	1.46373	1.04055	2.05901
16.6466	1.46063	1.04186	2.04774
16.2989	1.45139	1.04537	2.0151
11.3597	1.22342	1.02602	1.4588
2.62567	1.40929	1.12112	1.77153
7.36228	0.972296	0.768441	1.23023
15.0778	1.4129	1.05514	1.89196
0.0958274	3.4182	1.59803	7.31157
15.869	1.43891	1.04931	1.97318
13.895	1.36638	1.05923	1.7626
16.6219	1.46	1.04212	2.04546
13.7581	1.36036	1.05922	1.74711
2.2451	1.49885	1.17153	1.91762
16.1675	1.4477	1.04663	2.00246
12.1509	1.27711	1.04631	1.55882
16.7588	1.46346	1.04067	2.05801
11.5349	1.23629	1.03168	1.48148
16.0497	1.4443	1.04771	1.991
1.95762	1.57895	1.21532	2.05138
7.63881	0.977754	0.778158	1.22854
10.5711	1.15786	0.98765	1.3574
16.8273	1.46514	1.03993	2.06422
0.402475	2.56794	1.72212	3.82919
16.9313	1.46764	1.03878	2.07355
0.65984	2.25345	1.58289	3.20806
16.8656	1.46607	1.03951	2.06767
5.79345	1.01778	0.815604	1.27007
11.0996	1.20321	1.01598	1.42495
16.9478	1.46803	1.0386	2.07502
16.4166	1.4546	1.04422	2.02628
16.0525	1.44438	1.04769	1.99127
10.4808	1.14956	0.9815	1.34639
16.8574	1.46587	1.0396	2.06693
13.9963	1.37075	1.05916	1.77399
16.4495	1.45549	1.04389	2.02938
16.9149	1.46725	1.03896	2.07208
4.23283	1.15119	0.944135	1.40365
16.2469	1.44994	1.04587	2.01012
16.4604	1.45578	1.04378	2.03041
14.0483	1.37296	1.05911	1.77982
11.0147	1.19632	1.01222	1.41392
5.34717	1.04711	0.846894	1.29465
11.899	1.26122	1.04119	1.52775
4.92279	1.08052	0.880152	1.3265
5.90297	1.01131	0.808406	1.26515
8.5834	1.01381	0.833848	1.23261
8.1864	0.995689	0.806963	1.22855
16.7753	1.46386	1.04049	2.05951
16.9286	1.46758	1.03881	2.07331
6.68601	0.974464	0.765921	1.23979
9.91677	1.1011	0.939461	1.29055
5.32253	1.04888	0.848723	1.29625
16.7205	1.4625	1.04108	2.05452
3.95356	1.18657	0.973357	1.44648
11.4035	1.22669	1.02751	1.46449
3.63597	1.2307	1.00697	1.50414
16.7643	1.46359	1.04061	2.05851
16.5973	1.45937	1.04237	2.04318
9.42942	1.06476	0.900322	1.25923
13.1968	1.33412	1.05775	1.6827
2.26426	1.49393	1.16882	1.90948
16.7561	1.46339	1.0407	2.05776
3.02267	1.33072	1.07411	1.64864
16.4714	1.45607	1.04367	2.03144
16.893	1.46673	1.0392	2.07012
3.19242	1.30077	1.05507	1.60368
8.22747	0.997377	0.809545	1.22879
16.1647	1.44762	1.04665	2.0022
16.2277	1.4494	1.04606	2.00827
7.93177	0.986257	0.792175	1.22789
2.36009	1.47004	1.15555	1.87012
16.6877	1.46168	1.04143	2.05151
8.54507	1.01189	0.831082	1.23203
15.7622	1.43563	1.05021	1.96251
12.4576	1.29512	1.05118	1.59568
16.3016	1.45147	1.04535	2.01536
3.52919	1.24659	1.01839	1.52593
10.5136	1.15257	0.983765	1.35034
4.72566	1.09835	0.897029	1.34486
1.08148	1.94076	1.41322	2.66522
16.0881	1.44541	1.04736	1.99475
6.82839	0.971653	0.763253	1.23695
9.73606	1.08704	0.925147	1.27726
5.85095	1.01435	0.811804	1.26744
16.9697	1.46855	1.03836	2.07698
1.34158	1.80698	1.33941	2.43778
13.1859	1.33358	1.0577	1.68143
11.7621	1.25213	1.03794	1.51052
10.311	1.13431	0.969431	1.32723
15.5706	1.42957	1.05174	1.94312
15.242	1.41863	1.0541	1.90922
15.9101	1.44015	1.04895	1.97725
15.1818	1.41655	1.05449	1.90291
15.8937	1.43966	1.04909	1.97562
15.8553	1.4385	1.04942	1.97181
15.6691	1.43271	1.05096	1.95313
15.0504	1.41193	1.05531	1.88907
11.9483	1.26441	1.04228	1.53389
15.2283	1.41816	1.05419	1.90779
15.3023	1.42068	1.05369	1.9155
15.6089	1.4308	1.05144	1.94703
15.5295	1.42824	1.05205	1.93893
11.6663	1.24557	1.03544	1.49833
5.54156	1.0337	0.832853	1.28297
9.86475	1.09697	0.935365	1.2865
2.13284	1.52865	1.18791	1.96714
8.42734	1.00621	0.822797	1.23052
11.8935	1.26086	1.04107	1.52706
13.2379	1.33613	1.05795	1.68746
0.495565	2.43591	1.67043	3.55218
13.2844	1.33839	1.05815	1.69285
15.8882	1.43949	1.04914	1.97508
9.18027	1.04811	0.880068	1.24825
11.7211	1.24934	1.03689	1.50531
13.1913	1.33385	1.05773	1.68206
8.37258	1.00369	0.819059	1.22994
15.9676	1.44188	1.04845	1.98294
7.49096	0.974505	0.7725	1.22933
13.539	1.35043	1.05894	1.72215
15.1243	1.41454	1.05486	1.89687
15.0449	1.41173	1.05534	1.88849
7.05016	0.969957	0.76275	1.23345
15.0559	1.41212	1.05527	1.88965
15.2585	1.41919	1.05399	1.91093
9.90855	1.10044	0.938815	1.2899
10.8367	1.1814	1.00342	1.39093
15.2776	1.41985	1.05386	1.91293
13.4542	1.34648	1.05873	1.71242
15.2064	1.4174	1.05433	1.9055
6.51626	0.979809	0.77182	1.24385
8.39996	1.00494	0.820919	1.23022
15.9648	1.44179	1.04847	1.98267
8.67375	1.01848	0.840487	1.23416
15.8334	1.43783	1.04961	1.96963
15.9703	1.44196	1.04842	1.98321
13.7033	1.35791	1.05918	1.7409
15.1134	1.41416	1.05492	1.89572
6.55186	0.978496	0.770323	1.24293
15.8416	1.43808	1.04954	1.97045
15.6308	1.4315	1.05127	1.94925
15.8772	1.43916	1.04924	1.97399
5.79893	1.01745	0.81524	1.26981
0.394261	2.58097	1.72652	3.85831
13.3145	1.33984	1.05827	1.69633
2.34366	1.47406	1.15779	1.87671
15.5925	1.43027	1.05157	1.94536
3.77286	1.21113	0.992422	1.47803
15.1407	1.41512	1.05475	1.8986
13.8649	1.36507	1.05924	1.7592
15.0285	1.41115	1.05544	1.88675
1.45658	1.75657	1.3118	2.35213
15.6828	1.43315	1.05085	1.95452
15.6199	1.43115	1.05135	1.94814
6.37389	0.986136	0.779274	1.24791
15.5651	1.42939	1.05178	1.94257
15.5487	1.42886	1.05191	1.94089
7.84963	0.983609	0.787897	1.22794
2.77626	1.37794	1.10279	1.72175
14.6123	1.39572	1.05753	1.84207
15.201	1.41721	1.05437	1.90492
8.37531	1.00382	0.819244	1.22997
15.6281	1.43141	1.05129	1.94897
8.83529	1.0273	0.852734	1.2376
10.8531	1.1828	1.00429	1.39304
15.8006	1.43682	1.04989	1.96635
12.1728	1.27844	1.0467	1.56148
15.6582	1.43237	1.05105	1.95202
10.8422	1.18186	1.00371	1.39164
11.8169	1.2558	1.03928	1.51744
3.48264	1.2537	1.02339	1.53584
15.1845	1.41664	1.05447	1.9032
15.6993	1.43366	1.05072	1.95617
6.80375	0.972037	0.763576	1.23741
15.316	1.42115	1.0536	1.91692
14.4617	1.38986	1.05811	1.82563
7.48549	0.974399	0.77231	1.22937
12.4904	1.29698	1.05161	1.5996
15.7924	1.43656	1.04996	1.96553
4.69554	1.10123	0.899697	1.3479
10.8805	1.18513	1.00571	1.39656
13.8046	1.36242	1.05924	1.75239
14.4426	1.3891	1.05817	1.82353
15.9347	1.44089	1.04874	1.97969
12.5096	1.29806	1.05186	1.60188
15.0312	1.41125	1.05542	1.88704
12.1619	1.27777	1.04651	1.56015
15.6253	1.43132	1.05131	1.94869
12.7012	1.30861	1.05406	1.62463
15.5624	1.4293	1.0518	1.94229
15.5815	1.42992	1.05165	1.94424
13.6842	1.35705	1.05917	1.73872
5.50049	1.03644	0.835764	1.28531
6.79553	0.972175	0.763696	1.23757
8.67649	1.01862	0.840691	1.23421
7.19527	0.97042	0.764552	1.23172
10.4342	1.14533	0.978251	1.34094
7.12682	0.970057	0.763507	1.23248
15.8115	1.43715	1.04979	1.96744
10.5985	1.16036	0.98944	1.3608
15.7951	1.43665	1.04993	1.9658
9.53893	1.07249	0.909237	1.26506
10.8093	1.17904	1.00195	1.38742
8.38079	1.00406	0.819615	1.23002
15.1298	1.41473	1.05482	1.89745
15.3379	1.42189	1.05345	1.91919
15.8964	1.43974	1.04907	1.9759
4.07403	1.17094	0.960716	1.42717
11.9346	1.26353	1.04198	1.53219
15.9512	1.44139	1.04859	1.98132
14.9984	1.41007	1.05561	1.88355
15.2366	1.41844	1.05413	1.90865
15.2667	1.41947	1.05393	1.91179
15.5076	1.42752	1.05222	1.93669
15.7184	1.43427	1.05057	1.95811
15.472	1.42636	1.05248	1.93304
15.0175	1.41076	1.0555	1.88559
15.1599	1.41579	1.05463	1.90061
13.8238	1.36327	1.05924	1.75456
15.19	1.41683	1.05444	1.90377
15.8225	1.43749	1.0497	1.96854
15.3214	1.42133	1.05356	1.91749
11.962	1.26529	1.04257	1.5356
15.7376	1.43487	1.05041	1.96003
14.1715	1.37812	1.0589	1.79357
12.3316	1.28788	1.04936	1.58061
3.33479	1.27707	1.03942	1.56905
10.7902	1.17738	1.0009	1.38497
15.0531	1.41203	1.05529	1.88936
15.5049	1.42743	1.05224	1.93641
15.6007	1.43053	1.0515	1.94619
15.7266	1.43452	1.0505	1.95893
15.1982	1.41712	1.05439	1.90464
15.1106	1.41406	1.05494	1.89543
3.34027	1.27618	1.03882	1.56778
11.847	1.2578	1.04	1.52123
15.1736	1.41626	1.05454	1.90205
15.8143	1.43724	1.04977	1.96772
15.7732	1.43597	1.05012	1.96361
15.5405	1.42859	1.05197	1.94005
7.64976	0.978023	0.778617	1.2285
15.9156	1.44032	1.0489	1.9778
13.1338	1.33101	1.05742	1.67538
15.357	1.42253	1.05331	1.92118
5.82631	1.01581	0.813427	1.26855
5.41288	1.04245	0.842072	1.29052
3.20064	1.29936	1.05416	1.60161
7.97558	0.98775	0.79456	1.22791
8.69018	1.01935	0.841712	1.23447
15.2831	1.42003	1.05382	1.9135
7.2911	0.971337	0.766567	1.23081
11.6608	1.24518	1.03529	1.49763
15.7787	1.43614	1.05007	1.96416
15.1024	1.41377	1.05499	1.89456
15.9073	1.44007	1.04898	1.97698
15.5897	1.43018	1.05159	1.94508
13.7526	1.36012	1.05922	1.74649
3.2417	1.29242	1.04962	1.59139
10.823	1.18022	1.00269	1.38918
15.0476	1.41183	1.05532	1.88878
12.1126	1.27476	1.0456	1.55415
15.2475	1.41882	1.05406	1.90979
15.2092	1.4175	1.05431	1.90578
3.93988	1.18838	0.974797	1.44876
15.4748	1.42645	1.05246	1.93332
15.3324	1.4217	1.05348	1.91862
4.16165	1.15993	0.951555	1.41393
12.9148	1.3199	1.05597	1.64979
15.5542	1.42904	1.05186	1.94145
15.127	1.41464	1.05484	1.89716
7.59227	0.976652	0.776267	1.22876
15.8718	1.43899	1.04928	1.97345
15.7814	1.43623	1.05005	1.96443
10.8394	1.18163	1.00357	1.39128
10.8833	1.18536	1.00585	1.39692
12.5534	1.30051	1.05241	1.6071
10.6149	1.16185	0.990495	1.36284
3.78381	1.2096	0.991263	1.47602
9.80451	1.09228	0.930599	1.28204
15.5514	1.42895	1.05189	1.94117
15.5158	1.42779	1.05216	1.93753
15.4529	1.42573	1.05262	1.93107
15.1681	1.41607	1.05458	1.90148
11.3241	1.22073	1.02477	1.45418
15.3351	1.4218	1.05347	1.91891
15.6445	1.43193	1.05116	1.95064
4.21367	1.15352	0.946128	1.40637
11.4965	1.23353	1.03051	1.47653
15.4884	1.4269	1.05236	1.93473
15.2201	1.41787	1.05424	1.90693
11.3049	1.21928	1.02408	1.45169
13.8183	1.36303	1.05924	1.75394
15.6034	1.43062	1.05148	1.94647
15.0367	1.41144	1.05539	1.88762
15.086	1.41319	1.05509	1.89283
11.7457	1.25101	1.03752	1.50844
12.7779	1.31272	1.05481	1.63369
0.821378	2.11417	1.50879	2.96243
15.9758	1.44212	1.04837	1.98375
6.65864	0.975173	0.766665	1.24039
10.3411	1.13698	0.971616	1.33048
15.3515	1.42235	1.05335	1.92061
8.25211	0.99841	0.811118	1.22895
7.13503	0.970088	0.763615	1.23239
15.1626	1.41588	1.05461	1.9009
15.7157	1.43418	1.05059	1.95783
15.1216	1.41444	1.05487	1.89658
15.0257	1.41105	1.05545	1.88646
15.2858	1.42013	1.0538	1.91379
10.708	1.17018	0.996211	1.37453
15.0695	1.41261	1.05519	1.89109
15.932	1.44081	1.04876	1.97942
15.6883	1.43332	1.05081	1.95507
12.7396	1.31067	1.05444	1.62916
6.64768	0.975473	0.766984	1.24064
15.4775	1.42654	1.05244	1.9336
15.3652	1.42281	1.05325	1.92203
15.765	1.43572	1.05018	1.96278
15.9183	1.4404	1.04888	1.97807
15.6774	1.43297	1.0509	1.95396
15.8608	1.43866	1.04938	1.97236
15.7212	1.43435	1.05054	1.95838
15.702	1.43375	1.0507	1.95645
15.3981	1.42391	1.05302	1.92543
15.6801	1.43306	1.05088	1.95424
8.43281	1.00647	0.823175	1.23058
15.7841	1.43631	1.05002	1.96471
10.9325	1.18952	1.00832	1.40328
7.71274	0.979648	0.78136	1.22826
15.1517	1.4155	1.05468	1.89975
15.4309	1.425	1.05278	1.92882
15.88	1.43924	1.04921	1.97426
15.9293	1.44073	1.04878	1.97915
5.39098	1.04399	0.84367	1.29188
15.9867	1.44244	1.04828	1.98482
15.2749	1.41975	1.05388	1.91265
15.7595	1.43555	1.05023	1.96223
12.2714	1.28434	1.0484	1.57337
0.533896	2.38847	1.64915	3.45923
4.92005	1.08076	0.88038	1.32674
13.6458	1.35532	1.05912	1.73435
2.39295	1.46211	1.15112	1.85711
15.2694	1.41957	1.05392	1.91207
15.6856	1.43323	1.05083	1.95479
6.5765	0.977649	0.769369	1.24231
15.5678	1.42948	1.05176	1.94285
15.5323	1.42833	1.05203	1.93921
5.92213	1.01021	0.807164	1.26433
15.8389	1.43799	1.04956	1.97018
3.25813	1.28967	1.04781	1.58736
15.0641	1.41242	1.05522	1.89052
12.9093	1.31962	1.05593	1.64915
13.6075	1.35357	1.05906	1.72998
4.98302	1.07539	0.875189	1.32138
15.0887	1.41329	1.05507	1.89312
15.7102	1.43401	1.05063	1.95728
9.69773	1.08415	0.922074	1.27471
15.075	1.4128	1.05516	1.89167
12.0962	1.27374	1.04528	1.55214
15.2037	1.41731	1.05435	1.90521
11.4555	1.23053	1.02922	1.47123
8.89826	1.0309	0.857621	1.23919
15.1708	1.41617	1.05456	1.90176
9.05432	1.04021	0.869947	1.2438
15.7431	1.43504	1.05036	1.96058
15.138	1.41502	1.05477	1.89831
8.54233	1.01175	0.830886	1.23199
15.3707	1.42299	1.05322	1.9226
15.3543	1.42244	1.05333	1.9209
14.5521	1.3934	1.05778	1.83551
4.44639	1.12669	0.922782	1.37565
2.93779	1.34646	1.08383	1.67272
15.034	1.41134	1.0554	1.88733
15.2393	1.41853	1.05412	1.90893
12.2166	1.28108	1.04748	1.56678
8.14533	0.994047	0.804432	1.22836
15.5377	1.4285	1.05199	1.93977
9.82368	1.09376	0.932118	1.28344
10.949	1.19089	1.00912	1.4054
15.2557	1.4191	1.05401	1.91065
15.8991	1.43982	1.04905	1.97617
3.64144	1.2299	1.00638	1.50306
5.80714	1.01696	0.814695	1.26943
6.68875	0.974396	0.765851	1.23973
9.6594	1.08128	0.91899	1.27224
15.9265	1.44065	1.04881	1.97888
12.8135	1.3146	1.05513	1.63788
11.7046	1.24821	1.03646	1.50322
15.1325	1.41483	1.0548	1.89774
14.5493	1.39329	1.05779	1.83521
1.83989	1.6157	1.23526	2.11332
15.1489	1.4154	1.0547	1.89946
15.0203	1.41086	1.05548	1.88588
15.7349	1.43478	1.05043	1.95976
13.1201	1.33033	1.05735	1.67379
15.3735	1.42309	1.0532	1.92288
15.2968	1.4205	1.05373	1.91493
15.0668	1.41251	1.05521	1.89081
13.6622	1.35606	1.05914	1.73622
13.4295	1.34532	1.05866	1.70959
15.8526	1.43841	1.04945	1.97154
4.66543	1.10414	0.902391	1.351
8.90373	1.03122	0.858048	1.23934
15.1462	1.41531	1.05472	1.89918
7.68262	0.978855	0.780027	1.22836
9.03789	1.0392	0.868637	1.24326
3.35396	1.27397	1.03733	1.5646
15.6062	1.43071	1.05146	1.94675
7.66619	0.978435	0.779316	1.22843
15.5432	1.42868	1.05195	1.94033
2.17939	1.51608	1.18102	1.94621
15.5268	1.42815	1.05207	1.93865
15.5843	1.43001	1.05163	1.94452
12.5315	1.29929	1.05214	1.60449
5.68941	1.02417	0.822607	1.27512
9.59095	1.07625	0.913458	1.26806
4.78589	1.09273	0.891765	1.33898
15.7047	1.43384	1.05068	1.95673
6.40127	0.98479	0.777667	1.24708
10.2344	1.1276	0.963794	1.31925
10.8312	1.18093	1.00313	1.39023
14.73	1.4002	1.05701	1.85482
15.6609	1.43245	1.05103	1.9523
10.1796	1.12288	0.959703	1.3138
15.1654	1.41598	1.0546	1.90119
4.40806	1.13089	0.926503	1.38037
15.8362	1.43791	1.04959	1.9699
13.0982	1.32924	1.05722	1.67124
8.12343	0.99319	0.803104	1.22827
15.9539	1.44147	1.04857	1.98159
15.4912	1.42699	1.05234	1.93501
7.40335	0.972937	0.769644	1.22993
0.572226	2.34428	1.62829	3.37509
5.22944	1.05577	0.85574	1.30255
12.7834	1.31301	1.05486	1.63433
11.7402	1.25064	1.03738	1.50774
10.1166	1.11753	0.954938	1.30779
11.346	1.22239	1.02554	1.45702
15.3433	1.42207	1.05341	1.91976
15.2229	1.41797	1.05423	1.90722
15.8909	1.43958	1.04912	1.97535
4.26021	1.14789	0.94131	1.39982
15.3187	1.42124	1.05358	1.9172
12.2741	1.2845	1.04844	1.5737
9.0242	1.03837	0.867547	1.24283
15.3762	1.42318	1.05318	1.92316
7.28288	0.97124	0.76637	1.23088
1.70847	1.65998	1.25926	2.18823
15.6965	1.43358	1.05074	1.9559
13.3748	1.34272	1.05849	1.70328
8.56697	1.01298	0.832659	1.23236
15.4967	1.42716	1.0523	1.93557
9.22133	1.05077	0.883391	1.24985
15.8033	1.4369	1.04986	1.96662
8.33151	1.00185	0.816307	1.22956
12.1098	1.27459	1.04554	1.55381
6.34104	0.98777	0.781218	1.24893
13.4377	1.3457	1.05869	1.71053
8.18092	0.995468	0.806622	1.22853
10.5602	1.15686	0.986922	1.35605
15.8499	1.43833	1.04947	1.97127
0.542109	2.37874	1.64464	3.44052
14.4508	1.38943	1.05815	1.82443
12.1947	1.27976	1.04709	1.56413
1.24028	1.85546	1.36607	2.52016
9.85379	1.09611	0.9345	1.28567
9.08991	1.04241	0.872794	1.24498
15.0997	1.41367	1.05501	1.89427
11.1926	1.2106	1.01982	1.43707
7.74559	0.980546	0.782858	1.22815
1.05136	1.95844	1.42301	2.69534
7.20074	0.97046	0.764651	1.23166
15.3926	1.42373	1.05306	1.92486
0.249151	2.86688	1.78105	4.61468
15.4556	1.42582	1.0526	1.93135
13.4131	1.34454	1.05862	1.7077
15.4173	1.42455	1.05288	1.92741
15.3132	1.42106	1.05362	1.91663
15.65	1.43211	1.05112	1.95119
5.22122	1.05639	0.856368	1.30312
7.40061	0.972892	0.769561	1.22995
15.2448	1.41872	1.05408	1.9095
15.3242	1.42143	1.05354	1.91777
14.3002	1.3834	1.0586	1.80784
4.95291	1.07793	0.87766	1.32391
11.9401	1.26388	1.0421	1.53287
4.78316	1.09298	0.892002	1.33924
15.817	1.43732	1.04975	1.96799
15.9457	1.44122	1.04864	1.98077
15.2612	1.41928	1.05397	1.91122
5.81535	1.01647	0.814151	1.26905
0.58044	2.33519	1.62389	3.35805
15.8581	1.43858	1.0494	1.97209
5.86464	1.01355	0.810906	1.26683
15.4008	1.424	1.053	1.92571
14.4699	1.39018	1.05808	1.82653
15.2941	1.42041	1.05375	1.91464
6.86124	0.971204	0.762909	1.23637
7.75654	0.980853	0.783368	1.22812
15.9731	1.44204	1.0484	1.98348
15.3598	1.42263	1.05329	1.92146
15.3899	1.42363	1.05308	1.92458
12.4603	1.29528	1.05122	1.59601
3.26635	1.28831	1.04691	1.58537
8.06319	0.9909	0.799534	1.22807
14.9326	1.4077	1.05598	1.87656
12.5233	1.29883	1.05204	1.60351
15.7239	1.43444	1.05052	1.95866
3.26087	1.28922	1.04751	1.5867
8.47662	1.00855	0.826225	1.2311
7.14599	0.970133	0.763766	1.23226
4.61614	1.10901	0.906855	1.35622
7.74285	0.98047	0.782732	1.22816
15.2995	1.42059	1.05371	1.91521
9.97153	1.10551	0.943747	1.295
7.80583	0.982279	0.785722	1.22801
15.5459	1.42877	1.05193	1.94061
15.7568	1.43546	1.05025	1.96196
15.1435	1.41521	1.05474	1.89889
15.4665	1.42618	1.05252	1.93248
15.7978	1.43673	1.04991	1.96608
14.8806	1.4058	1.05626	1.87101
12.3699	1.2901	1.04994	1.5852
5.06516	1.06861	0.868558	1.31473
13.0353	1.32607	1.05683	1.66389
4.49841	1.12111	0.917807	1.36945
3.80298	1.20694	0.989235	1.47255
5.9632	1.00786	0.804519	1.2626
15.0093	1.41046	1.05555	1.88472
13.0709	1.32786	1.05706	1.66804
15.4364	1.42518	1.05274	1.92938
6.78184	0.972414	0.76391	1.23783
3.16504	1.30547	1.05811	1.61065
8.59435	1.01437	0.834644	1.23279
12.9121	1.31976	1.05595	1.64947
7.51013	0.974884	0.773175	1.22922
0.0574964	3.67767	1.37957	9.80397
13.3255	1.34037	1.05831	1.6976
7.71547	0.979722	0.781483	1.22825
15.9895	1.44253	1.04825	1.98509
13.0106	1.32482	1.05667	1.66101
15.4583	1.42591	1.05258	1.93163
13.1037	1.32951	1.05725	1.67187
13.1174	1.33019	1.05733	1.67347
11.5623	1.23825	1.0325	1.485
15.4392	1.42527	1.05272	1.92966
11.6937	1.24746	1.03617	1.50182
15.6472	1.43202	1.05114	1.95091
15.4939	1.42707	1.05232	1.93529
3.08564	1.31938	1.06699	1.63147
8.09057	0.991929	0.801142	1.22815
1.18005	1.88635	1.38312	2.57267
11.5321	1.23609	1.0316	1.48112
7.78666	0.981716	0.784795	1.22805
0.999343	1.9903	1.44065	2.74965
15.42	1.42464	1.05286	1.92769
8.14807	0.994155	0.804599	1.22837
14.2619	1.38184	1.0587	1.8036
13.2242	1.33546	1.05788	1.68587
7.72369	0.979944	0.781854	1.22822
2.35188	1.47204	1.15667	1.87341
8.32603	1.00161	0.815944	1.22952
11.6636	1.24538	1.03537	1.49798
12.8162	1.31475	1.05516	1.6382
15.9375	1.44098	1.04871	1.97996
11.1735	1.20909	1.01905	1.43457
8.48757	1.00908	0.826995	1.23124
0.279268	2.79668	1.77593	4.40414
4.02749	1.17691	0.965594	1.43448
8.91469	1.03185	0.858904	1.23963
12.7889	1.3133	1.05491	1.63498
15.0066	1.41037	1.05556	1.88443
5.42109	1.04188	0.841474	1.29002
2.12737	1.53015	1.18873	1.96964
2.19582	1.51172	1.17862	1.93896
15.305	1.42078	1.05367	1.91578
10.541	1.15509	0.985633	1.35369
7.32121	0.971719	0.767326	1.23056
15.9484	1.4413	1.04862	1.98104
15.0942	1.41348	1.05504	1.8937
5.64013	1.02728	0.825983	1.27764
10.1906	1.12382	0.960526	1.31487
11.2501	1.21508	1.02205	1.44456
14.6698	1.39792	1.05729	1.84831
14.6671	1.39782	1.0573	1.84801
7.87975	0.984557	0.789436	1.22791
9.92498	1.10176	0.940105	1.2912
14.1441	1.37698	1.05896	1.79052
7.11861	0.970031	0.763405	1.23258
12.8272	1.31533	1.05525	1.63949
11.7567	1.25176	1.0378	1.50982
14.051	1.37308	1.0591	1.78013
14.2235	1.38027	1.05879	1.79935
6.74899	0.973042	0.764498	1.23847
14.96	1.40869	1.05583	1.87948
14.062	1.37354	1.05909	1.78135
14.9381	1.4079	1.05595	1.87715
12.1783	1.27877	1.0468	1.56214
4.15617	1.16061	0.952127	1.41474
14.3604	1.38583	1.05843	1.81449
7.77571	0.981399	0.784271	1.22807
13.5007	1.34865	1.05885	1.71776
14.6808	1.39834	1.05724	1.84949
14.574	1.39425	1.05769	1.8379
14.1359	1.37664	1.05897	1.78961
14.8615	1.40509	1.05636	1.86895
9.9195	1.10132	0.939676	1.29077
9.67583	1.08251	0.920313	1.27329
3.34848	1.27485	1.03792	1.56586
5.08159	1.06728	0.86725	1.31345
14.2317	1.38061	1.05877	1.80026
10.938	1.18998	1.00859	1.40398
14.2673	1.38206	1.05869	1.80421
14.2427	1.38105	1.05875	1.80148
14.0373	1.3725	1.05912	1.77859
13.8977	1.3665	1.05923	1.7629
8.58066	1.01367	0.833649	1.23257
14.5137	1.3919	1.05792	1.83132
14.3248	1.3844	1.05854	1.81057
14.6479	1.39709	1.05738	1.84593
10.7217	1.17139	0.997015	1.37627
11.1242	1.20519	1.01703	1.42816
14.8724	1.4055	1.0563	1.87013
14.8341	1.40409	1.0565	1.86602
13.7937	1.36194	1.05924	1.75115
11.5814	1.23961	1.03306	1.48746
14.0538	1.37319	1.0591	1.78043
3.47443	1.25497	1.02428	1.53762
6.37937	0.985866	0.778951	1.24774
10.2316	1.12736	0.963591	1.31897
14.9737	1.40918	1.05575	1.88094
8.41638	1.0057	0.822043	1.2304
12.8381	1.3159	1.05535	1.64078
14.3577	1.38572	1.05844	1.81419
8.73946	1.02199	0.845415	1.23545
6.66959	0.974883	0.766358	1.24015
8.49305	1.00934	0.827381	1.23131
11.7977	1.25452	1.03882	1.51502
14.7602	1.40133	1.05687	1.85807
14.5931	1.39499	1.05761	1.83998
6.21235	0.994334	0.788955	1.25318
14.344	1.38517	1.05848	1.81268
14.5548	1.3935	1.05776	1.83581
14.2263	1.38038	1.05879	1.79966
14.7246	1.4	1.05704	1.85423
10.0181	1.10931	0.947365	1.29895
14.0565	1.37331	1.05909	1.78074
13.6486	1.35544	1.05912	1.73466
1.62633	1.68964	1.27536	2.2385
11.3733	1.22445	1.02649	1.46058
13.3556	1.34181	1.05842	1.70107
13.6787	1.3568	1.05916	1.73809
14.6452	1.39698	1.05739	1.84564
14.3988	1.38736	1.05832	1.81871
14.3303	1.38462	1.05852	1.81117
4.50115	1.12082	0.917548	1.36913
14.0757	1.37412	1.05907	1.78288
14.1633	1.37778	1.05892	1.79266
14.4207	1.38823	1.05825	1.82112
14.5165	1.39201	1.05791	1.83162
14.7054	1.39927	1.05713	1.85216
13.3419	1.34116	1.05838	1.69949
11.6909	1.24727	1.0361	1.50147
14.2454	1.38117	1.05874	1.80178
10.9462	1.19066	1.00899	1.40505
14.2701	1.38217	1.05868	1.80451
14.8916	1.4062	1.0562	1.87218
3.81667	1.20504	0.987787	1.47008
8.52316	1.01081	0.829516	1.23172
14.626	1.39625	1.05748	1.84355
14.7684	1.40164	1.05683	1.85896
12.0387	1.27016	1.04416	1.54508
13.331	1.34063	1.05834	1.69823
14.7383	1.40051	1.05697	1.85571
14.6506	1.39719	1.05737	1.84623
13.8101	1.36267	1.05924	1.75301
14.804	1.40297	1.05665	1.86278
10.5903	1.15961	0.988907	1.35978
10.4917	1.15056	0.982257	1.3477
14.7793	1.40205	1.05678	1.86013
6.16855	0.996631	0.791634	1.25471
6.85029	0.971345	0.763013	1.23656
14.9491	1.40829	1.05589	1.87831
13.9579	1.3691	1.0592	1.76968
14.8177	1.40348	1.05659	1.86426
13.5993	1.3532	1.05905	1.72904
14.1332	1.37653	1.05898	1.7893
14.7081	1.39938	1.05711	1.85246
4.6134	1.10928	0.907105	1.35652
14.8779	1.4057	1.05628	1.87071
11.795	1.25434	1.03875	1.51467
14.9217	1.4073	1.05604	1.87539
14.8423	1.40439	1.05646	1.8669
9.16931	1.04741	0.879183	1.24783
14.7985	1.40277	1.05668	1.8622
10.1522	1.12054	0.957639	1.31115
14.8532	1.40479	1.0564	1.86807
14.396	1.38725	1.05833	1.81841
5.53882	1.03388	0.833046	1.28313
14.1469	1.3771	1.05895	1.79083
14.5329	1.39265	1.05785	1.83342
14.0948	1.37492	1.05904	1.78502
14.1085	1.3755	1.05902	1.78655
14.8834	1.4059	1.05625	1.8713
14.125	1.37618	1.05899	1.78839
8.09331	0.992033	0.801304	1.22816
5.47311	1.0383	0.83772	1.2869
1.3717	1.79333	1.33192	2.41459
14.459	1.38975	1.05812	1.82533
14.3851	1.38682	1.05836	1.81721
14.2974	1.38329	1.05861	1.80754
7.56489	0.976037	0.775201	1.22891
14.6096	1.39562	1.05754	1.84177
14.1523	1.37733	1.05894	1.79144
5.18289	1.05931	0.859314	1.30586
13.884	1.36591	1.05924	1.76136
14.3221	1.38429	1.05854	1.81026
14.3933	1.38714	1.05833	1.81811
14.7109	1.39948	1.0571	1.85275
14.7656	1.40154	1.05684	1.85866
7.27467	0.971147	0.766177	1.23095
14.2098	1.37971	1.05882	1.79783
14.229	1.38049	1.05878	1.79996
14.741	1.40062	1.05696	1.856
14.7218	1.39989	1.05705	1.85393
14.6068	1.39551	1.05756	1.84147
14.1742	1.37824	1.0589	1.79388
14.9299	1.4076	1.056	1.87627
10.5492	1.15585	0.986188	1.3547
10.5766	1.15836	0.988011	1.35808
14.2044	1.37948	1.05884	1.79722
13.3583	1.34194	1.05843	1.70139
7.78118	0.981557	0.784532	1.22806
2.18486	1.51462	1.18022	1.94378
6.56281	0.978114	0.769891	1.24265
5.96046	1.00802	0.804695	1.26272
10.4452	1.14632	0.979019	1.34221
14.9409	1.408	1.05593	1.87744
14.8067	1.40307	1.05664	1.86308
14.1113	1.37561	1.05901	1.78686
10.6177	1.1621	0.99067	1.36318
14.0182	1.37168	1.05914	1.77645
13.999	1.37086	1.05916	1.7743
2.43402	1.45236	1.14565	1.84118
14.9682	1.40899	1.05578	1.88035
5.87833	1.01275	0.810011	1.26622
14.4234	1.38834	1.05824	1.82142
14.0209	1.3718	1.05914	1.77675
2.9241	1.34905	1.08541	1.67671
14.4398	1.38899	1.05818	1.82323
7.11039	0.970008	0.763308	1.23268
14.6835	1.39844	1.05723	1.84979
14.7766	1.40195	1.05679	1.85984
14.522	1.39222	1.05789	1.83222
14.1907	1.37891	1.05886	1.7957
14.9135	1.407	1.05608	1.87452
9.45406	1.06648	0.90233	1.26048
7.64703	0.977955	0.778502	1.22851
14.4316	1.38867	1.05821	1.82232
14.5466	1.39318	1.0578	1.83491
10.2672	1.13046	0.966223	1.32262
14.24	1.38094	1.05876	1.80117
2.52984	1.43035	1.1332	1.80543
1.28409	1.83399	1.35425	2.48367
14.9162	1.4071	1.05607	1.87481
14.5767	1.39435	1.05768	1.83819
5.97415	1.00724	0.803818	1.26215
14.5685	1.39403	1.05771	1.8373
9.96605	1.10507	0.943319	1.29455
14.8587	1.40499	1.05638	1.86866
14.3385	1.38495	1.0585	1.81208
14.4782	1.39051	1.05805	1.82743
14.7492	1.40092	1.05692	1.85689
14.0784	1.37423	1.05906	1.78319
14.2016	1.37937	1.05884	1.79692
14.6534	1.3973	1.05736	1.84653
14.1304	1.37641	1.05898	1.789
6.74351	0.973154	0.764606	1.23858
3.01172	1.33272	1.07536	1.65168
14.0401	1.37261	1.05912	1.7789
14.3741	1.38638	1.05839	1.816
14.919	1.4072	1.05605	1.8751
14.6424	1.39688	1.05741	1.84534
12.6136	1.30384	1.05312	1.61425
14.4946	1.39115	1.05799	1.82923
6.87219	0.97107	0.762816	1.23618
14.6342	1.39656	1.05744	1.84445
9.93319	1.10242	0.940749	1.29186
14.8259	1.40378	1.05654	1.86514
14.6616	1.39761	1.05732	1.84742
14.9518	1.40839	1.05587	1.8786
14.3632	1.38594	1.05843	1.8148
0.824116	2.11205	1.50764	2.95877
11.4336	1.22892	1.02851	1.46839
14.1879	1.3788	1.05887	1.7954
6.15212	0.997501	0.792645	1.2553
10.8942	1.18629	1.00641	1.39833
14.5658	1.39393	1.05772	1.837
12.9696	1.32272	1.05638	1.65621
14.0291	1.37215	1.05913	1.77767
8.40269	1.00507	0.821106	1.23025
12.6656	1.30668	1.05369	1.62042
4.09046	1.16885	0.958997	1.42464
13.4679	1.34712	1.05877	1.71399
14.1058	1.37538	1.05902	1.78625
13.3337	1.34076	1.05835	1.69854
14.2126	1.37982	1.05882	1.79814
0.679006	2.2352	1.57344	3.17529
14.3467	1.38528	1.05847	1.81298
11.3295	1.22115	1.02496	1.45489
14.5083	1.39169	1.05794	1.83072
14.689	1.39865	1.0572	1.85038
14.3057	1.38362	1.05859	1.80845
14.971	1.40908	1.05577	1.88064
5.27325	1.05249	0.852417	1.29953
13.257	1.33706	1.05803	1.68968
8.504	1.00987	0.828155	1.23146
7.15146	0.970159	0.763844	1.2322
12.1673	1.27811	1.04661	1.56082
14.2591	1.38173	1.05871	1.8033
14.8971	1.4064	1.05617	1.87276
12.3754	1.29042	1.05002	1.58586
14.3549	1.38561	1.05845	1.81389
14.1852	1.37869	1.05888	1.79509
14.1551	1.37744	1.05894	1.79174
14.6014	1.3953	1.05758	1.84088
11.3022	1.21907	1.02398	1.45133
14.8943	1.4063	1.05619	1.87247
6.94886	0.970351	0.762462	1.23492
14.8752	1.4056	1.05629	1.87042
14.2865	1.38284	1.05864	1.80633
3.1185	1.31357	1.0633	1.62275
8.01117	0.989004	0.796548	1.22796
14.2892	1.38295	1.05863	1.80663
9.62381	1.07866	0.916117	1.27003
14.0894	1.37469	1.05905	1.78441
3.29372	1.28378	1.04391	1.57877
13.3227	1.34024	1.0583	1.69728
14.6315	1.39646	1.05745	1.84415
14.3413	1.38506	1.05849	1.81238
14.9025	1.4066	1.05614	1.87335
14.4152	1.38802	1.05826	1.82052
10.7984	1.17809	1.00135	1.38602
13.2762	1.33799	1.05812	1.6919
10.9928	1.19452	1.0112	1.41108
14.6041	1.39541	1.05757	1.84117
14.7465	1.40082	1.05693	1.85659
12.0195	1.26895	1.04377	1.54272
14.7821	1.40215	1.05676	1.86043
2.96791	1.34081	1.08037	1.66405
14.7875	1.40236	1.05674	1.86102
4.90089	1.08242	0.881979	1.32842
9.96879	1.10529	0.943533	1.29477
14.845	1.40449	1.05645	1.86719
8.66827	1.01819	0.84008	1.23406
9.38287	1.06155	0.896529	1.25694
14.0675	1.37377	1.05908	1.78196
12.3152	1.28692	1.0491	1.57864
10.9161	1.18814	1.00751	1.40115
14.2536	1.3815	1.05872	1.80269
7.80309	0.982198	0.785589	1.22801
9.99343	1.10729	0.945452	1.29684
1.92476	1.58895	1.22075	2.06821
14.1825	1.37858	1.05888	1.79479
14.856	1.40489	1.05639	1.86837
14.4371	1.38889	1.05819	1.82293
14.615	1.39583	1.05752	1.84236
10.8997	1.18675	1.00668	1.39903
11.5048	1.23412	1.03077	1.47759
14.5712	1.39414	1.0577	1.8376
4.86529	1.08555	0.884972	1.33159
14.1496	1.37721	1.05895	1.79113
14.281	1.38262	1.05865	1.80572
13.0572	1.32717	1.05697	1.66645
14.7191	1.39979	1.05706	1.85364
2.9022	1.35322	1.08795	1.68316
3.96725	1.18476	0.971918	1.44422
13.435	1.34557	1.05868	1.71022
3.48812	1.25286	1.0228	1.53466
4.87351	1.08482	0.884279	1.33085
5.23218	1.05556	0.855531	1.30236
14.2071	1.37959	1.05883	1.79753
9.65393	1.08088	0.918548	1.2719
11.3158	1.22011	1.02447	1.45311
14.8012	1.40287	1.05667	1.86249
14.0592	1.37342	1.05909	1.78105
14.7273	1.4001	1.05702	1.85453
8.45471	1.0075	0.824694	1.23084
14.114	1.37573	1.05901	1.78716
8.11247	0.992766	0.802446	1.22823
9.06801	1.04105	0.871041	1.24425
14.3084	1.38373	1.05858	1.80875
6.46424	0.981919	0.774271	1.24526
10.7683	1.17548	0.999683	1.38218
11.1981	1.21103	1.02004	1.43778
14.0319	1.37226	1.05913	1.77798
12.8491	1.31648	1.05544	1.64207
14.8998	1.4065	1.05616	1.87305
7.79761	0.982036	0.785323	1.22802
14.5302	1.39254	1.05786	1.83312
10.2426	1.12831	0.964403	1.32008
4.90636	1.08194	0.881521	1.32793
14.9901	1.40978	1.05566	1.88268
2.11094	1.53468	1.1912	1.97719
14.7027	1.39917	1.05714	1.85186
14.1934	1.37903	1.05886	1.79601
13.5199	1.34954	1.0589	1.71996
14.4042	1.38758	1.0583	1.81932
14.8368	1.40419	1.05649	1.86631
3.23897	1.29288	1.04992	1.59206
11.9565	1.26494	1.04245	1.53492
14.166	1.37789	1.05891	1.79296
14.0921	1.37481	1.05904	1.78472
8.58614	1.01395	0.834046	1.23266
9.39109	1.06211	0.897198	1.25734
14.1277	1.3763	1.05899	1.78869
14.0018	1.37098	1.05916	1.7746
9.62107	1.07845	0.915895	1.26986
14.8642	1.4052	1.05635	1.86925
12.077	1.27256	1.04491	1.54979
3.68525	1.22355	1.00172	1.49451
2.88304	1.3569	1.09019	1.68886
12.9066	1.31947	1.05591	1.64883
12.3809	1.29073	1.0501	1.58651
12.2303	1.2819	1.04771	1.56843
14.0729	1.374	1.05907	1.78258
0.287482	2.77874	1.77368	4.35331
0.101303	3.38832	1.61818	7.09483
13.8402	1.36399	1.05924	1.75641
14.0866	1.37458	1.05905	1.78411
1.4292	1.76817	1.31814	2.37184
5.2486	1.05433	0.854282	1.30122
1.74406	1.64762	1.25256	2.16729
14.3276	1.38451	1.05853	1.81087
8.49578	1.00947	0.827574	1.23135
14.1167	1.37584	1.059	1.78747
10.2836	1.1319	0.967431	1.32433
2.1657	1.51975	1.18303	1.95231
1.10065	1.92978	1.40714	2.64653
5.51966	1.03516	0.834402	1.28421
14.8231	1.40368	1.05656	1.86484
11.3761	1.22465	1.02658	1.46094
7.76202	0.981008	0.783624	1.22811
8.05498	0.990596	0.799056	1.22805
6.05629	1.00267	0.79861	1.25888
2.43128	1.45301	1.14602	1.84223
1.15267	1.90096	1.3912	2.59752
9.80999	1.0927	0.931033	1.28244
5.62918	1.02798	0.826739	1.27822
8.73398	1.0217	0.845002	1.23534
1.44289	1.76234	1.31496	2.36193
8.71208	1.02052	0.843352	1.2349
0.936371	2.03128	1.4633	2.81971
14.8396	1.40429	1.05647	1.86661
6.3602	0.986815	0.780082	1.24833
2.71328	1.3908	1.11037	1.74207
14.5849	1.39467	1.05764	1.83909
7.58132	0.976403	0.775837	1.22882
12.6437	1.30549	1.05345	1.61783
14.4124	1.38791	1.05827	1.82022
6.27259	0.991228	0.785309	1.25114
0.991129	1.99548	1.44352	2.75851
12.3672	1.28994	1.0499	1.58487
14.5001	1.39137	1.05797	1.82983
6.06451	1.00222	0.798094	1.25856
14.3823	1.38671	1.05837	1.81691
14.0346	1.37238	1.05912	1.77829
14.5356	1.39276	1.05784	1.83372
14.3659	1.38605	1.05842	1.8151
14.5877	1.39478	1.05763	1.83939
7.02826	0.969991	0.762618	1.23375
14.4918	1.39105	1.058	1.82893
10.8477	1.18233	1.004	1.39234
3.00898	1.33322	1.07567	1.65245
2.97339	1.33979	1.07974	1.66248
9.11729	1.04412	0.874992	1.24594
10.0591	1.11271	0.950536	1.30255
8.84898	1.02807	0.853792	1.23793
9.46227	1.06705	0.902999	1.26091
12.7587	1.3117	1.05463	1.63143
1.79608	1.63006	1.24304	2.13757
4.10141	1.16747	0.957851	1.42296
14.3194	1.38417	1.05855	1.80996
1.17457	1.88925	1.38472	2.57759
14.2838	1.38273	1.05865	1.80603
0.908991	2.05001	1.47363	2.85183
5.49775	1.03663	0.835959	1.28547
6.60114	0.976851	0.768482	1.24172
14.7848	1.40226	1.05675	1.86072
10.5821	1.15886	0.988371	1.35876
14.5384	1.39286	1.05783	1.83401
14.8149	1.40338	1.0566	1.86396
5.0898	1.06662	0.866598	1.31281
0.531158	2.39174	1.65066	3.46555
2.72971	1.38741	1.10838	1.7367
6.45329	0.982393	0.774827	1.24556
14.4343	1.38878	1.0582	1.82262
4.73114	1.09784	0.896546	1.34432
5.34991	1.04691	0.846691	1.29447
2.21224	1.50739	1.17624	1.93178
6.08093	1.00133	0.797065	1.25794
1.62907	1.68863	1.2748	2.23678
7.48001	0.974294	0.772122	1.2294
11.4856	1.23273	1.03017	1.47512
1.21016	1.8707	1.37448	2.54606
7.23634	0.970756	0.765339	1.23131
0.457234	2.4871	1.6919	3.65603
5.98237	1.00678	0.803293	1.26182
14.4727	1.39029	1.05807	1.82683
1.85358	1.61129	1.23287	2.10588
14.6233	1.39614	1.05749	1.84326
10.7299	1.17212	0.997494	1.37731
14.6287	1.39635	1.05746	1.84385
2.69959	1.39365	1.11203	1.74658
3.66608	1.22632	1.00376	1.49822
14.5192	1.39212	1.0579	1.83192
14.2509	1.38139	1.05873	1.80239
3.95083	1.18693	0.973645	1.44694
7.58953	0.976589	0.776159	1.22878
6.66685	0.974954	0.766434	1.24021
3.96999	1.1844	0.97163	1.44377
13.2543	1.33693	1.05802	1.68936
14.7629	1.40144	1.05686	1.85837
5.75238	1.02027	0.818349	1.27202
3.94535	1.18765	0.974221	1.44785
6.70518	0.974	0.765446	1.23938
4.82423	1.08923	0.888465	1.33536
3.79203	1.20845	0.990393	1.47453
1.24302	1.85409	1.36532	2.51784
7.6881	0.978997	0.780266	1.22834
4.73935	1.09706	0.895824	1.34351
13.5336	1.35017	1.05893	1.72153
13.3857	1.34325	1.05853	1.70454
10.9791	1.19339	1.01056	1.4093
11.6855	1.24689	1.03596	1.50078
13.7855	1.36158	1.05923	1.75022
11.0612	1.20012	1.01431	1.41996
9.6375	1.07966	0.917223	1.27087
13.0407	1.32634	1.05687	1.66453
13.0763	1.32814	1.05709	1.66868
5.70584	1.02314	0.82149	1.2743
8.34246	1.00234	0.817037	1.22966
13.3091	1.33958	1.05825	1.6957
13.2269	1.3356	1.0579	1.68619
9.72511	1.08621	0.92427	1.27652
13.3446	1.34129	1.05839	1.69981
7.37871	0.972545	0.768912	1.23011
7.80035	0.982117	0.785455	1.22802
13.0599	1.32731	1.05699	1.66677
13.216	1.33506	1.05785	1.68492
13.0435	1.32648	1.05688	1.66485
13.9443	1.36851	1.05921	1.76815
13.9059	1.36686	1.05923	1.76383
12.8518	1.31662	1.05546	1.64239
13.6349	1.35482	1.05911	1.7331
5.82357	1.01598	0.813607	1.26868
12.2276	1.28173	1.04766	1.5681
13.5308	1.35005	1.05892	1.72121
13.7991	1.36218	1.05924	1.75177
6.96255	0.970261	0.762452	1.23471
11.6882	1.24708	1.03603	1.50113
5.25134	1.05412	0.854074	1.30103
4.12058	1.16505	0.955846	1.42005
1.64823	1.68157	1.27097	2.22482
4.87625	1.08458	0.884048	1.33061
13.4843	1.34788	1.05881	1.71588
13.0243	1.32551	1.05676	1.66261
13.5609	1.35144	1.05898	1.72466
5.95499	1.00833	0.805047	1.26294
13.038	1.32621	1.05685	1.66421
8.86267	1.02885	0.854852	1.23827
13.9224	1.36757	1.05922	1.76568
4.06034	1.17269	0.96215	1.4293
13.0544	1.32703	1.05695	1.66613
13.7334	1.35926	1.05921	1.74432
13.3392	1.34103	1.05837	1.69918
13.0928	1.32896	1.05719	1.6706
7.77023	0.981241	0.784012	1.22809
13.9388	1.36828	1.05921	1.76753
13.9826	1.37016	1.05918	1.77245
13.5418	1.35055	1.05895	1.72247
0.511992	2.41515	1.66127	3.51114
4.38068	1.13395	0.92919	1.38382
13.2105	1.33479	1.05782	1.68429
9.75523	1.08849	0.926678	1.27857
13.7608	1.36048	1.05922	1.74742
13.1147	1.33006	1.05732	1.67315
13.78	1.36133	1.05923	1.7496
13.2625	1.33733	1.05806	1.69032
13.665	1.35619	1.05914	1.73653
13.7252	1.3589	1.0592	1.74338
13.3638	1.3422	1.05845	1.70202
13.3802	1.34298	1.05851	1.70391
13.1092	1.32978	1.05728	1.67251
13.8813	1.36579	1.05924	1.76105
13.2132	1.33493	1.05783	1.6846
13.5774	1.35219	1.05901	1.72654
8.2877	0.999932	0.813422	1.22921
6.76815	0.972666	0.764143	1.23809
2.89399	1.35479	1.08891	1.68559
13.1557	1.3321	1.05754	1.67793
13.6376	1.35494	1.05911	1.73341
13.2488	1.33666	1.058	1.68873
12.0879	1.27324	1.04513	1.55113
11.4801	1.23233	1.03	1.47441
13.8621	1.36495	1.05924	1.75889
8.35615	1.00295	0.817953	1.22979
13.7088	1.35816	1.05919	1.74152
13.9169	1.36733	1.05922	1.76506
9.33085	1.05802	0.892291	1.25452
9.16384	1.04706	0.878741	1.24763
13.7909	1.36182	1.05924	1.75084
13.0955	1.3291	1.0572	1.67092
11.6718	1.24594	1.03559	1.49903
13.6568	1.35581	1.05913	1.7356
12.9969	1.32412	1.05658	1.65941
10.656	1.16555	0.993071	1.36798
1.49491	1.74073	1.30316	2.32523
8.6272	1.01605	0.837046	1.23333
5.60453	1.02957	0.828445	1.27953
13.0818	1.32841	1.05712	1.66932
0.966488	2.01133	1.45228	2.78558
13.6321	1.3547	1.0591	1.73279
9.44584	1.0659	0.901661	1.26006
2.59555	1.41581	1.12488	1.78199
9.66488	1.08169	0.919431	1.27259
6.78458	0.972365	0.763866	1.23777
13.383	1.34312	1.05852	1.70423
13.654	1.35569	1.05913	1.73529
6.52174	0.9796	0.771581	1.2437
13.5171	1.34941	1.05889	1.71964
13.5883	1.3527	1.05903	1.72779
9.52798	1.07171	0.908347	1.26444
10.3275	1.13576	0.970625	1.329
8.29865	1.00041	0.814139	1.22929
10.2754	1.13118	0.966828	1.32347
13.6294	1.35457	1.0591	1.73248
6.90505	0.970716	0.762602	1.23562
13.1585	1.33223	1.05756	1.67825
13.2735	1.33786	1.0581	1.69158
13.5911	1.35282	1.05904	1.7281
13.936	1.36816	1.05921	1.76722
7.02278	0.970003	0.76259	1.23383
13.6705	1.35643	1.05915	1.73716
5.27051	1.0527	0.852623	1.29972
11.0886	1.20233	1.01551	1.42352
13.1311	1.33087	1.05741	1.67506
13.3611	1.34207	1.05844	1.7017
2.20403	1.50955	1.17743	1.93536
13.821	1.36315	1.05924	1.75425
0.95006	2.02213	1.45825	2.80405
11.4007	1.22649	1.02742	1.46413
6.916	0.970613	0.762551	1.23544
10.5629	1.15711	0.987105	1.35639
8.25485	0.998526	0.811294	1.22897
8.9804	1.03573	0.864074	1.24149
13.9552	1.36899	1.0592	1.76938
13.5938	1.35295	1.05904	1.72841
13.1722	1.33291	1.05763	1.67984
10.0263	1.10999	0.948001	1.29966
12.7341	1.31038	1.05439	1.62852
13.8868	1.36602	1.05924	1.76167
13.8265	1.36339	1.05924	1.75487
13.0736	1.328	1.05707	1.66836
8.88183	1.02995	0.856341	1.23876
13.6157	1.35395	1.05908	1.73092
13.5582	1.35131	1.05898	1.72435
13.2461	1.33653	1.05799	1.68841
12.6301	1.30474	1.0533	1.6162
13.1694	1.33277	1.05761	1.67952
13.8484	1.36435	1.05924	1.75734
13.3118	1.33971	1.05826	1.69601
2.49151	1.43904	1.13813	1.8195
13.5555	1.35119	1.05897	1.72403
13.8785	1.36567	1.05924	1.76074
7.63334	0.97762	0.777931	1.22857
13.6677	1.35631	1.05915	1.73685
13.7471	1.35987	1.05922	1.74587
13.6869	1.35717	1.05917	1.73903
6.49436	0.980669	0.772814	1.24443
13.5746	1.35207	1.05901	1.72622
13.2433	1.3364	1.05797	1.6881
13.6513	1.35557	1.05913	1.73497
2.35462	1.47138	1.1563	1.87231
13.1941	1.33399	1.05774	1.68238
11.4144	1.22751	1.02788	1.46591
7.22265	0.970634	0.765064	1.23144
13.0517	1.3269	1.05694	1.66581
13.4213	1.34493	1.05864	1.70864
13.9251	1.36769	1.05922	1.76599
13.5965	1.35307	1.05905	1.72873
10.6752	1.16726	0.994244	1.37039
6.00701	1.0054	0.801724	1.26082
13.8074	1.36254	1.05924	1.7527
13.4733	1.34737	1.05879	1.71462
12.2988	1.28595	1.04884	1.57666
13.0051	1.32454	1.05663	1.66037
12.2331	1.28206	1.04776	1.56876
13.6732	1.35656	1.05915	1.73747
13.0791	1.32827	1.05711	1.669
13.4788	1.34763	1.0588	1.71525
13.2297	1.33573	1.05791	1.68651
4.95838	1.07747	0.877209	1.32344
5.74964	1.02044	0.818533	1.27215
13.0216	1.32537	1.05674	1.66229
13.7718	1.36097	1.05923	1.74867
6.93517	0.970452	0.762488	1.23514
13.153	1.33196	1.05753	1.67761
13.5692	1.35182	1.059	1.7256
2.91863	1.35008	1.08605	1.67831
13.9196	1.36745	1.05922	1.76537
13.9525	1.36887	1.0592	1.76907
7.04468	0.969963	0.762714	1.23353
8.77231	1.02379	0.847908	1.23615
13.843	1.36411	1.05924	1.75672
13.1886	1.33372	1.05771	1.68174
13.9634	1.36934	1.05919	1.7703
11.7731	1.25287	1.03821	1.5119
6.64495	0.975549	0.767066	1.2407
13.9333	1.36804	1.05921	1.76691
10.0235	1.10976	0.947789	1.29942
4.76399	1.09476	0.893668	1.34109
13.8594	1.36483	1.05924	1.75858
13.6951	1.35754	1.05918	1.73996
13.1119	1.32992	1.0573	1.67283
12.5452	1.30005	1.05231	1.60612
13.8457	1.36423	1.05924	1.75703
7.0173	0.970018	0.762566	1.23391
8.06867	0.991104	0.799853	1.22809
6.04534	1.00328	0.799299	1.25931
13.2817	1.33826	1.05814	1.69253
12.0852	1.27307	1.04507	1.5508
11.6334	1.24328	1.03454	1.49413
10.3302	1.136	0.970823	1.32929
13.7307	1.35914	1.05921	1.74401
13.498	1.34852	1.05885	1.71745
13.8375	1.36387	1.05924	1.7561
13.3282	1.3405	1.05832	1.69791
13.2926	1.33879	1.05818	1.6938
1.91929	1.59064	1.22166	2.07105
12.8546	1.31676	1.05549	1.64271
6.45055	0.982513	0.774968	1.24564
0.922681	2.04057	1.46843	2.83564
11.4527	1.23033	1.02913	1.47087
11.2255	1.21317	1.02111	1.44135
13.7416	1.35963	1.05921	1.74525
1.26218	1.84462	1.3601	2.50174
11.001	1.1952	1.01159	1.41214
13.0325	1.32593	1.05681	1.66357
10.6779	1.16751	0.99441	1.37073
10.6998	1.16945	0.995724	1.3735
4.28212	1.14529	0.939069	1.39681
13.2078	1.33466	1.05781	1.68397
13.9607	1.36922	1.0592	1.76999
0.112255	3.33233	1.65293	6.71801
13.55	1.35093	1.05896	1.72341
5.95773	1.00817	0.804871	1.26283
8.8435	1.02776	0.853368	1.2378
13.0188	1.32523	1.05672	1.66197
13.2652	1.33746	1.05807	1.69063
13.3994	1.34389	1.05857	1.70612
10.3932	1.14162	0.975345	1.33625
7.97832	0.987846	0.794711	1.22792
13.1065	1.32965	1.05727	1.67219
8.04676	0.990293	0.798581	1.22803
2.382	1.46474	1.15259	1.86142
13.9771	1.36993	1.05918	1.77184
6.98992	0.970117	0.762478	1.2343
1.35254	1.80198	1.33666	2.42929
5.82083	1.01614	0.813788	1.2688
3.31289	1.28063	1.04181	1.57421
7.45537	0.973835	0.771293	1.22956
8.52864	1.01108	0.829907	1.2318
8.47114	1.00829	0.825842	1.23104
9.50334	1.06995	0.906343	1.26309
13.6924	1.35742	1.05917	1.73965
13.3693	1.34246	1.05847	1.70265
6.0207	1.00464	0.800856	1.26027
0.208082	2.97615	1.77684	4.98494
13.7663	1.36073	1.05923	1.74805
11.6581	1.24499	1.03522	1.49728
13.1475	1.33169	1.0575	1.67697
9.48691	1.06879	0.905006	1.26221
9.86748	1.09719	0.935581	1.28671
13.7061	1.35804	1.05919	1.74121
3.14314	1.30926	1.06055	1.61631
8.23568	0.99772	0.810067	1.22884
13.5719	1.35194	1.059	1.72591
13.7499	1.36	1.05922	1.74618
13.9032	1.36674	1.05923	1.76352
9.01051	1.03754	0.86646	1.2424
12.6328	1.30489	1.05333	1.61653
8.03307	0.989793	0.797794	1.228
13.728	1.35902	1.0592	1.7437
8.79148	1.02485	0.84937	1.23658
8.39174	1.00457	0.820359	1.23014
13.9744	1.36981	1.05918	1.77153
12.474	1.29605	1.0514	1.59764
10.4178	1.14384	0.977093	1.33905
10.9243	1.18883	1.00791	1.40221
13.7115	1.35828	1.05919	1.74183
13.3063	1.33945	1.05824	1.69538
3.43062	1.26179	1.02901	1.54722
13.2707	1.33773	1.05809	1.69127
13.769	1.36085	1.05923	1.74836
6.4615	0.982037	0.774409	1.24533
3.28277	1.28558	1.04511	1.58139
13.2899	1.33866	1.05817	1.69348
5.83178	1.01549	0.813065	1.2683
10.8066	1.1788	1.0018	1.38707
13.2516	1.3368	1.05801	1.68905
9.2405	1.05202	0.884945	1.25063
13.8019	1.3623	1.05924	1.75208
13.8566	1.36471	1.05924	1.75827
2.98708	1.33726	1.07817	1.6586
13.5144	1.34929	1.05889	1.71933
13.2351	1.336	1.05794	1.68714
13.0626	1.32745	1.05701	1.66709
13.32	1.34011	1.05829	1.69696
6.61209	0.976511	0.768109	1.24146
8.81612	1.02622	0.851259	1.23714
3.7756	1.21074	0.992132	1.47753
13.3474	1.34142	1.0584	1.70012
6.53817	0.978989	0.770882	1.24328
12.6273	1.30459	1.05327	1.61588
6.25068	0.99235	0.78663	1.25187
13.205	1.33452	1.05779	1.68365
13.7882	1.3617	1.05924	1.75053
2.39021	1.46276	1.15149	1.85818
6.94612	0.97037	0.762466	1.23496
13.3939	1.34363	1.05855	1.70549
10.6943	1.16897	0.995398	1.3728
1.87274	1.60518	1.22955	2.09557
3.27456	1.28694	1.04601	1.58338
13.4076	1.34428	1.0586	1.70707
13.7636	1.3606	1.05923	1.74774
8.71482	1.02066	0.843558	1.23495
2.76257	1.38071	1.10442	1.72611
13.8293	1.36351	1.05924	1.75518
13.7444	1.35975	1.05921	1.74556
3.14861	1.30831	1.05994	1.61489
13.9716	1.36969	1.05919	1.77122
4.40258	1.1315	0.927038	1.38106
13.5089	1.34903	1.05887	1.7187
13.1667	1.33264	1.0576	1.6792
13.8758	1.36555	1.05924	1.76043
13.4761	1.3475	1.05879	1.71493
10.9846	1.19384	1.01082	1.41001
12.819	1.31489	1.05518	1.63853
1.30051	1.82614	1.34993	2.47033
8.55054	1.01216	0.831475	1.23211
7.34038	0.97198	0.767835	1.2304
2.55448	1.42485	1.13006	1.79654
4.99671	1.07424	0.874073	1.32024
13.5527	1.35106	1.05897	1.72372
1.12529	1.91595	1.39949	2.623
13.3036	1.33932	1.05823	1.69507
2.17391	1.51755	1.18182	1.94864
10.3548	1.13819	0.972602	1.33198
10.771	1.17571	0.999836	1.38253
13.6896	1.3573	1.05917	1.73934
11.3925	1.22588	1.02714	1.46307
13.09	1.32882	1.05717	1.67028
3.89333	1.1946	0.979697	1.45664
10.5054	1.15182	0.983201	1.34935
8.92016	1.03217	0.859333	1.23978
4.56412	1.11427	0.911643	1.36193
13.2324	1.33586	1.05792	1.68683
5.07338	1.06794	0.867903	1.31409
9.23502	1.05166	0.884501	1.25041
13.4952	1.3484	1.05884	1.71713
13.3775	1.34285	1.0585	1.7036
13.6759	1.35668	1.05916	1.73778
13.4186	1.3448	1.05863	1.70833
10.667	1.16653	0.993743	1.36936
13.3501	1.34155	1.05841	1.70044
13.6184	1.35407	1.05908	1.73123
13.4158	1.34467	1.05862	1.70801
5.13087	1.06336	0.863362	1.30969
1.89738	1.59743	1.22535	2.0825
0.262841	2.83406	1.77939	4.51384
5.67846	1.02486	0.823354	1.27567
0.961012	2.01491	1.45426	2.79169
11.3816	1.22506	1.02677	1.46165
12.9504	1.32174	1.05624	1.65396
7.61417	0.977161	0.777145	1.22866
13.4651	1.34699	1.05876	1.71368
7.50192	0.97472	0.772883	1.22927
13.424	1.34506	1.05865	1.70896
11.1434	1.20671	1.01782	1.43065
11.9839	1.26669	1.04303	1.53831
3.8769	1.19682	0.981429	1.45948
13.2872	1.33852	1.05816	1.69317
13.4624	1.34686	1.05876	1.71336
13.4569	1.3466	1.05874	1.71273
5.67572	1.02503	0.823541	1.27581
0.640675	2.27224	1.59252	3.24206
6.6203	0.976263	0.767837	1.24126
3.6387	1.2303	1.00667	1.5036
13.4596	1.34673	1.05875	1.71305
6.42865	0.983498	0.776131	1.24627
2.53806	1.42851	1.13215	1.80245
7.00361	0.970062	0.762514	1.2341
13.8676	1.36519	1.05924	1.75951
13.9141	1.36721	1.05922	1.76476
8.57518	1.0134	0.833252	1.23249
6.43686	0.983124	0.775689	1.24603
9.20217	1.04952	0.881839	1.2491
11.3624	1.22363	1.02611	1.45916
12.7669	1.31213	1.05471	1.6324
6.37663	0.986001	0.779112	1.24783
12.7533	1.3114	1.05458	1.63078
12.5561	1.30066	1.05244	1.60742
9.89213	1.09914	0.937523	1.28861
5.35538	1.04652	0.846287	1.29412
12.192	1.2796	1.04705	1.5638
0.81864	2.11628	1.50995	2.9661
10.7956	1.17786	1.0012	1.38567
4.25474	1.14855	0.941873	1.40058
5.76607	1.01944	0.817431	1.27136
3.57299	1.24	1.01369	1.51684
5.63465	1.02763	0.826361	1.27793
12.86	1.31705	1.05553	1.64336
3.24718	1.2915	1.04902	1.59004
4.4108	1.13059	0.926236	1.38003
12.7122	1.3092	1.05417	1.62593
3.51276	1.24909	1.02015	1.5294
11.4692	1.23153	1.02965	1.473
9.88391	1.09849	0.936876	1.28797
11.9291	1.26318	1.04186	1.53151
11.68	1.24651	1.03581	1.50008
11.0229	1.197	1.01259	1.41498
11.7183	1.24915	1.03682	1.50496
11.6389	1.24366	1.03469	1.49483
12.6684	1.30683	1.05372	1.62075
12.7149	1.30935	1.0542	1.62625
11.2556	1.2155	1.02226	1.44527
12.9257	1.32047	1.05606	1.65107
11.5486	1.23727	1.03209	1.48324
7.68536	0.978926	0.780146	1.22835
11.6417	1.24385	1.03477	1.49518
11.1379	1.20628	1.0176	1.42994
10.6587	1.16579	0.99324	1.36832
12.2933	1.28563	1.04875	1.57601
7.71	0.979575	0.781237	1.22827
8.70113	1.01993	0.842531	1.23468
3.44705	1.25922	1.02723	1.54359
8.46293	1.00789	0.825267	1.23093
4.06582	1.17199	0.961577	1.42844
11.2529	1.21529	1.02215	1.44492
12.1153	1.27493	1.04565	1.55448
9.32811	1.05783	0.892068	1.2544
8.1289	0.993403	0.803435	1.22829
4.64626	1.10602	0.904119	1.35301
2.51615	1.43344	1.13495	1.81042
3.87143	1.19756	0.982006	1.46043
0.733764	2.18582	1.54742	3.0876
12.0825	1.2729	1.04502	1.55046
10.1687	1.12194	0.958879	1.31274
8.80243	1.02546	0.850208	1.23683
12.9449	1.32145	1.0562	1.65332
10.322	1.13528	0.970228	1.32841
8.53959	1.01162	0.83069	1.23195
11.2392	1.21423	1.02163	1.44313
11.6362	1.24347	1.03461	1.49448
9.1611	1.04689	0.87852	1.24753
3.37312	1.27089	1.03524	1.56018
12.2495	1.28304	1.04804	1.57074
8.17271	0.995137	0.806113	1.22848
10.9681	1.19248	1.01004	1.40788
11.2885	1.21802	1.02348	1.44955
1.07327	1.94553	1.41586	2.67334
4.33414	1.13923	0.933814	1.38984
10.719	1.17115	0.996855	1.37592
12.0031	1.26791	1.04343	1.54069
10.196	1.12429	0.960936	1.31541
11.1844	1.20996	1.01949	1.436
11.7512	1.25139	1.03766	1.50913
8.48483	1.00894	0.826802	1.23121
12.3864	1.29105	1.05018	1.58717
5.11992	1.06422	0.864221	1.31051
4.50389	1.12053	0.917289	1.36881
12.7861	1.31315	1.05488	1.63466
1.44836	1.76002	1.31369	2.358
6.53543	0.979089	0.770996	1.24335
8.64637	1.01704	0.838458	1.23366
11.3569	1.22322	1.02592	1.45845
10.4288	1.14483	0.977865	1.3403
12.1372	1.27627	1.04606	1.55715
9.41299	1.06362	0.898983	1.25841
9.43489	1.06514	0.900768	1.2595
3.45526	1.25794	1.02635	1.54179
10.1632	1.12147	0.958466	1.31221
4.56138	1.11455	0.911898	1.36224
4.8872	1.08362	0.883126	1.32963
1.96583	1.57648	1.21398	2.04723
8.40817	1.00532	0.82148	1.23031
11.8853	1.26033	1.04088	1.52604
3.62501	1.2323	1.00814	1.50632
10.6067	1.1611	0.989969	1.36182
6.21783	0.994049	0.788621	1.25299
7.70452	0.979429	0.780992	1.22829
12.6574	1.30624	1.0536	1.61945
11.0859	1.20211	1.01539	1.42317
7.97284	0.987656	0.794409	1.22791
7.53203	0.975333	0.773968	1.22909
10.2152	1.12594	0.962368	1.31732
3.01446	1.33222	1.07505	1.65092
3.54835	1.2437	1.01633	1.52193
10.7135	1.17067	0.996534	1.37523
6.49984	0.98045	0.77256	1.24428
2.10546	1.5362	1.19203	1.97972
10.029	1.11022	0.948213	1.2999
10.5684	1.15761	0.987469	1.35706
12.4685	1.29574	1.05133	1.59699
3.30468	1.28198	1.04271	1.57616
12.0934	1.27358	1.04523	1.55181
10.886	1.1856	1.00599	1.39727
10.3494	1.13771	0.972208	1.33138
1.70573	1.66095	1.25978	2.18986
11.4883	1.23293	1.03026	1.47547
10.1194	1.11776	0.955147	1.30805
12.1016	1.27408	1.04539	1.55281
4.1726	1.15857	0.950411	1.41232
9.41025	1.06343	0.89876	1.25827
11.4062	1.2269	1.0276	1.46484
11.4445	1.22973	1.02886	1.46981
0.0602344	3.65522	1.40131	9.53441
10.2973	1.1331	0.968433	1.32577
6.23973	0.992914	0.787292	1.25224
11.2419	1.21444	1.02174	1.44349
10.7409	1.17308	0.998126	1.3787
12.4028	1.292	1.05042	1.58913
9.87022	1.0974	0.935797	1.28692
2.56817	1.42182	1.12833	1.79165
12.5205	1.29867	1.052	1.60319
10.8148	1.17951	1.00225	1.38813
10.5246	1.15358	0.984514	1.35167
11.1653	1.20845	1.01872	1.43351
10.4069	1.14285	0.976318	1.3378
5.34443	1.0473	0.847097	1.29483
10.1413	1.11961	0.95681	1.31011
11.5842	1.23981	1.03314	1.48781
2.08904	1.54077	1.19453	1.98737
11.8634	1.25889	1.04038	1.52329
11.231	1.21359	1.02132	1.44206
12.5068	1.29791	1.05183	1.60156
3.65239	1.2283	1.00522	1.5009
4.49294	1.12169	0.918327	1.37009
12.9641	1.32244	1.05634	1.65557
10.4151	1.14359	0.976899	1.33873
10.9709	1.19271	1.01017	1.40824
11.3104	1.21969	1.02428	1.4524
2.04797	1.5524	1.20088	2.00683
12.6164	1.30399	1.05315	1.61458
3.36765	1.27177	1.03584	1.56144
11.8306	1.25672	1.03961	1.51916
10.6451	1.16456	0.992393	1.36661
5.97689	1.00709	0.803643	1.26204
12.0277	1.26947	1.04394	1.54373
2.7434	1.38461	1.10673	1.73226
9.49239	1.06917	0.905451	1.2625
11.4719	1.23173	1.02974	1.47335
2.52163	1.4322	1.13425	1.80842
10.2508	1.12903	0.965011	1.32092
4.36152	1.13611	0.931085	1.38628
12.6383	1.30519	1.05339	1.61718
11.2939	1.21844	1.02368	1.45026
10.9544	1.19135	1.00938	1.40611
11.8059	1.25507	1.03902	1.51606
[truncated: 3,673 more rows]

## Sheet: IHD
time(year)	hr	hr_lci	hr_uci
6.14117	0.750588	0.610369	0.92302
16.6192	0.862611	0.626983	1.18679
16.1236	0.862619	0.631889	1.1776
16.945	0.862414	0.623785	1.19233
10.7464	0.823051	0.676369	1.00154
16.0306	0.862572	0.632813	1.17575
16.9094	0.862437	0.624132	1.19173
16.2523	0.862658	0.630613	1.18009
16.0223	0.862567	0.632895	1.17559
16.6055	0.862617	0.627118	1.18655
16.1373	0.862625	0.631753	1.17787
16.1127	0.862614	0.631998	1.17738
16.6986	0.862571	0.6262	1.18816
16.6493	0.862597	0.626686	1.18732
16.3701	0.862668	0.629446	1.1823
16.9861	0.862388	0.623387	1.19302
14.8669	0.860596	0.644375	1.14937
16.8985	0.862444	0.624238	1.19155
16.0661	0.862592	0.63246	1.17646
16.8738	0.86246	0.624479	1.19113
5.98237	0.752267	0.610211	0.927393
16.1017	0.862609	0.632106	1.17717
16.2441	0.862657	0.630694	1.17993
16.4933	0.862653	0.628227	1.18456
16.6028	0.862618	0.627145	1.1865
16.0689	0.862593	0.632432	1.17652
5.20753	0.767316	0.620237	0.949274
16.8519	0.862474	0.624693	1.19076
13.2023	0.852486	0.660369	1.10049
16.5672	0.862632	0.627497	1.18588
10.1248	0.810429	0.676451	0.970942
16.1291	0.862621	0.631835	1.17771
13.1284	0.851951	0.661039	1.098
16.5453	0.862639	0.627713	1.18549
8.107	0.759867	0.646866	0.892607
16.9259	0.862426	0.623972	1.19201
16.7917	0.862512	0.625283	1.18974
16.2578	0.862659	0.630558	1.18019
16.4549	0.862661	0.628606	1.18386
16.5289	0.862644	0.627875	1.1852
16.7725	0.862524	0.625471	1.18942
16.2605	0.86266	0.630531	1.18025
16.9122	0.862435	0.624105	1.19178
16.4823	0.862656	0.628335	1.18436
16.4878	0.862654	0.628281	1.18446
9.695	0.800439	0.675139	0.948994
16.1182	0.862617	0.631943	1.17749
16.4851	0.862655	0.628308	1.18441
2.18213	1.02183	0.853022	1.22405
8.11521	0.760021	0.647082	0.892672
16.7534	0.862537	0.62566	1.1891
16.1428	0.862627	0.631699	1.17797
16.6548	0.862594	0.626632	1.18741
10.4616	0.817537	0.67661	0.987818
16.1592	0.862633	0.631536	1.1783
16.0634	0.862591	0.632487	1.17641
9.92772	0.805974	0.676042	0.960878
4.24926	0.813659	0.674052	0.982181
13.1749	0.85229	0.660618	1.09957
16.8492	0.862475	0.62472	1.19072
16.0442	0.86258	0.632677	1.17603
7.74012	0.75424	0.637598	0.892221
16.0853	0.862602	0.632269	1.17684
12.4055	0.845778	0.667234	1.0721
16.778	0.862521	0.625418	1.18951
16.9067	0.862439	0.624158	1.19169
2.89125	0.931655	0.790414	1.09814
11.1187	0.829461	0.67534	1.01875
10.6232	0.820722	0.676511	0.995676
16.8465	0.862477	0.624746	1.19067
12.7067	0.848569	0.664742	1.08323
16.099	0.862608	0.632133	1.17711
16.8547	0.862472	0.624666	1.19081
16.5891	0.862624	0.62728	1.18626
16.6658	0.862589	0.626524	1.1876
16.6247	0.862609	0.626929	1.18689
14.5795	0.859679	0.647214	1.14189
16.7342	0.862549	0.625849	1.18877
16.0278	0.862571	0.63284	1.1757
16.2797	0.862663	0.630341	1.18061
16.444	0.862662	0.628715	1.18366
3.49086	0.872481	0.738248	1.03112
13.613	0.855158	0.656561	1.11383
12.0359	0.841874	0.670059	1.05775
16.0059	0.862557	0.633058	1.17526
16.6083	0.862616	0.627091	1.1866
16.5261	0.862645	0.627902	1.18515
4.77494	0.78305	0.637142	0.962373
8.56149	0.770063	0.658615	0.90037
16.3153	0.862667	0.629988	1.18128
16.8684	0.862463	0.624532	1.19104
2.39842	0.991801	0.833836	1.17969
16.2742	0.862662	0.630395	1.18051
0.13142	1.62631	0.983543	2.68913
16.1045	0.862611	0.632079	1.17722
16.2961	0.862665	0.630178	1.18092
16.507	0.86265	0.628092	1.1848
16.0908	0.862604	0.632215	1.17695
4.55865	0.794007	0.650118	0.969742
5.65655	0.75712	0.61207	0.936544
12.2604	0.844311	0.668378	1.06655
12.0715	0.842275	0.669801	1.05916
14.4562	0.859229	0.648425	1.13857
16.5042	0.862651	0.628119	1.18475
16.0415	0.862579	0.632704	1.17597
9.61833	0.798552	0.674718	0.945113
16.3892	0.862668	0.629256	1.18266
16.7944	0.86251	0.625256	1.18979
16.7506	0.862539	0.625687	1.18905
0.755668	1.32391	1.02453	1.71078
14.9573	0.860847	0.64348	1.15164
16.277	0.862662	0.630368	1.18056
9.84011	0.803925	0.675762	0.956394
16.663	0.86259	0.626551	1.18755
6.95981	0.748164	0.619934	0.902918
16.8081	0.862502	0.625122	1.19002
7.28014	0.749747	0.626603	0.897093
16.1839	0.862641	0.631291	1.17877
8.63542	0.772013	0.660416	0.902469
16.3728	0.862668	0.629419	1.18235
13.1859	0.852368	0.660519	1.09994
2.68864	0.955037	0.808242	1.12849
16.8163	0.862496	0.625041	1.19016
15.8553	0.862442	0.634554	1.17217
4.03844	0.828562	0.691526	0.992755
16.1209	0.862618	0.631916	1.17755
5.54978	0.759154	0.613383	0.939567
13.7964	0.856199	0.654821	1.11951
16.5836	0.862626	0.627334	1.18617
12.9997	0.850981	0.662192	1.09359
16.5781	0.862628	0.627388	1.18607
10.4863	0.818033	0.676601	0.989028
16.392	0.862668	0.629229	1.18271
16.8903	0.862449	0.624318	1.19141
16.2359	0.862655	0.630775	1.17978
16.1811	0.86264	0.631318	1.17872
16.8957	0.862446	0.624265	1.1915
16.1264	0.86262	0.631862	1.17765
16.5124	0.862649	0.628038	1.1849
16.2167	0.86265	0.630965	1.17941
15.2256	0.861492	0.640817	1.15816
16.6356	0.862604	0.626821	1.18708
16.3126	0.862666	0.630016	1.18123
15.5186	0.86203	0.637904	1.1649
2.664	0.958017	0.810424	1.13249
12.6492	0.848062	0.665229	1.08115
16.7397	0.862546	0.625795	1.18886
9.74154	0.80157	0.675362	0.951362
7.55394	0.752117	0.633034	0.893601
16.7999	0.862507	0.625202	1.18988
16.1401	0.862626	0.631726	1.17792
13.9826	0.857164	0.653035	1.1251
3.54561	0.867706	0.733518	1.02644
9.60191	0.798143	0.674619	0.944286
11.0393	0.82817	0.675629	1.01515
4.19176	0.817626	0.67878	0.984873
2.39568	0.992166	0.834077	1.18022
16.5617	0.862634	0.627551	1.18578
16.8382	0.862482	0.624827	1.19053
16.1072	0.862612	0.632052	1.17728
11.8744	0.839988	0.671194	1.05123
15.0832	0.861169	0.642231	1.15474
11.5431	0.835739	0.673279	1.0374
9.71964	0.801039	0.67526	0.950246
16.7013	0.862569	0.626173	1.18821
16.162	0.862634	0.631509	1.17835
16.1455	0.862628	0.631672	1.17803
15.3077	0.86166	0.640001	1.16009
16.1757	0.862638	0.631373	1.17861
16.5508	0.862637	0.627659	1.18559
16.2386	0.862655	0.630748	1.17983
14.7328	0.860191	0.645702	1.14593
5.92487	0.752982	0.610318	0.928994
16.7369	0.862547	0.625822	1.18882
16.2551	0.862659	0.630585	1.18014
2.43128	0.987448	0.830942	1.17343
2.16022	1.02502	0.854988	1.22886
7.62786	0.752911	0.634837	0.892947
16.9806	0.862392	0.62344	1.19293
16.3345	0.862668	0.629799	1.18164
9.20764	0.787926	0.671067	0.925136
16.3536	0.862668	0.629609	1.182
16.5864	0.862625	0.627307	1.18621
7.10492	0.748718	0.622809	0.90008
8.93933	0.780552	0.667004	0.913431
16.0607	0.862589	0.632514	1.17635
15.5131	0.862021	0.637958	1.16478
16.3755	0.862668	0.629392	1.18241
16.1565	0.862632	0.631563	1.17824
16.4741	0.862657	0.628417	1.18421
3.23623	0.895973	0.760329	1.05582
9.64297	0.799162	0.674861	0.946358
16.0333	0.862574	0.632786	1.17581
12.6985	0.848498	0.664812	1.08294
15.9265	0.862502	0.633847	1.17364
16.6849	0.862578	0.626335	1.18793
12.975	0.850789	0.66241	1.09274
6.32461	0.749169	0.611326	0.918093
16.7315	0.862551	0.625876	1.18872
16.5425	0.86264	0.62774	1.18544
2.31629	1.00292	0.841086	1.19589
16.5398	0.862641	0.627767	1.18539
16.5316	0.862643	0.627848	1.18524
7.4718	0.751311	0.631057	0.89448
16.548	0.862638	0.627686	1.18554
16.6603	0.862591	0.626578	1.1875
16.5809	0.862627	0.627361	1.18612
10.8641	0.825178	0.676139	1.00707
16.6959	0.862572	0.626227	1.18812
16.11	0.862613	0.632025	1.17733
10.4479	0.817261	0.676614	0.987144
4.78589	0.782555	0.636571	0.962019
16.5097	0.862649	0.628065	1.18485
10.7573	0.823253	0.676352	1.00206
16.6931	0.862574	0.626254	1.18807
4.00011	0.831381	0.694741	0.994896
7.27741	0.749728	0.626541	0.897135
6.20688	0.750017	0.61062	0.921237
2.65579	0.959016	0.811151	1.13384
4.84339	0.780045	0.633703	0.960181
7.60048	0.75261	0.634167	0.893173
7.24455	0.749507	0.625808	0.897657
8.93111	0.780322	0.666853	0.913097
12.4192	0.845912	0.667124	1.07261
16.047	0.862582	0.63265	1.17608
13.0654	0.851483	0.661605	1.09585
14.1332	0.85788	0.651579	1.1295
0.454496	1.43907	1.07552	1.92551
7.86332	0.755867	0.640632	0.89183
1.08969	1.22811	0.971311	1.55281
3.12945	0.90651	0.76962	1.06775
16.2715	0.862661	0.630423	1.18045
16.789	0.862514	0.62531	1.1897
14.2646	0.858459	0.6503	1.13325
16.8766	0.862458	0.624452	1.19118
16.904	0.86244	0.624185	1.19164
11.9428	0.840801	0.670722	1.05401
14.2783	0.858517	0.650166	1.13363
12.2221	0.84391	0.668673	1.06507
12.3946	0.84567	0.667322	1.07168
10.8258	0.824496	0.676224	1.00528
16.674	0.862584	0.626443	1.18774
3.30194	0.889698	0.75462	1.04895
15.2639	0.861572	0.640436	1.15907
5.92761	0.752946	0.610311	0.928918
5.17194	0.768338	0.621221	0.950295
3.32658	0.887384	0.752481	1.04647
16.9724	0.862397	0.62352	1.19279
14.9765	0.860898	0.64329	1.15212
14.4973	0.859383	0.648022	1.13968
15.1051	0.861221	0.642014	1.15527
1.30599	1.17714	0.942549	1.47012
9.19395	0.787558	0.670896	0.924506
16.8711	0.862461	0.624505	1.19109
16.203	0.862647	0.631101	1.17914
16.6411	0.862601	0.626767	1.18717
13.8731	0.856607	0.654088	1.12183
16.4358	0.862664	0.628796	1.18351
16.5699	0.862631	0.62747	1.18592
1.62359	1.11307	0.906438	1.36681
8.99135	0.782006	0.667918	0.915582
16.2633	0.86266	0.630504	1.1803
4.14522	0.82089	0.682629	0.987154
16.1483	0.862629	0.631644	1.17808
15.7513	0.862337	0.635589	1.16998
7.01183	0.748331	0.620934	0.901866
14.8204	0.86046	0.644836	1.14819
16.3974	0.862667	0.629175	1.18281
16.9423	0.862416	0.623812	1.19228
8.44924	0.767248	0.655795	0.897642
16.6767	0.862583	0.626416	1.18779
16.3208	0.862667	0.629934	1.18138
16.2934	0.862664	0.630205	1.18087
2.19855	1.01946	0.851552	1.22049
16.559	0.862635	0.627578	1.18573
2.03154	1.0443	0.866674	1.25832
16.3372	0.862668	0.629772	1.18169
16.4139	0.862666	0.629013	1.18311
10.834	0.824643	0.676207	1.00566
1.27861	1.18322	0.945974	1.47996
16.4522	0.862661	0.628633	1.18381
16.6575	0.862593	0.626605	1.18746
4.14796	0.820697	0.682402	0.987017
9.19122	0.787484	0.670862	0.92438
16.83	0.862488	0.624907	1.19039
16.8355	0.862484	0.624854	1.19049
16.8136	0.862498	0.625068	1.19012
16.1866	0.862642	0.631264	1.17883
16.7807	0.862519	0.625391	1.18956
16.9532	0.862409	0.623706	1.19247
15.4282	0.861882	0.638803	1.16286
13.446	0.85413	0.658126	1.10851
9.38835	0.792706	0.672998	0.933706
16.2332	0.862654	0.630803	1.17972
16.4686	0.862658	0.628471	1.18411
16.7233	0.862556	0.625957	1.18859
13.5281	0.854646	0.657359	1.11114
13.2981	0.853153	0.659493	1.10368
6.97076	0.748196	0.620142	0.902693
6.8941	0.748005	0.618725	0.904297
8.16176	0.760917	0.648303	0.893092
5.24313	0.766339	0.619319	0.948261
16.9888	0.862386	0.62336	1.19307
8.35067	0.764929	0.653254	0.895694
16.6274	0.862607	0.626902	1.18693
9.83463	0.803795	0.675743	0.956114
16.7178	0.862559	0.626011	1.18849
13.9004	0.856749	0.653825	1.12265
2.10273	1.03351	0.860177	1.24176
16.3509	0.862668	0.629636	1.18195
16.7616	0.862532	0.625579	1.18924
4.45461	0.800133	0.657569	0.973606
16.9834	0.86239	0.623413	1.19297
5.45942	0.761058	0.614788	0.942128
16.2003	0.862646	0.631128	1.17909
1.97131	1.05368	0.872246	1.27285
11.9374	0.840737	0.67076	1.05379
12.6465	0.848037	0.665252	1.08105
4.64352	0.789432	0.644632	0.966758
4.58055	0.792791	0.648652	0.968959
16.6822	0.86258	0.626362	1.18788
2.26153	1.01052	0.84594	1.20712
3.07195	0.912365	0.774629	1.07459
16.9286	0.862425	0.623945	1.19205
2.50794	0.977487	0.824193	1.15929
10.9024	0.82585	0.676044	1.00885
13.2789	0.853022	0.659669	1.10305
2.05344	1.04094	0.864665	1.25316
14.5055	0.859413	0.647941	1.1399
5.14456	0.769154	0.622024	0.951086
13.3008	0.853172	0.659468	1.10377
16.3317	0.862668	0.629826	1.18159
16.2195	0.862651	0.630938	1.17946
8.63268	0.77194	0.66035	0.902386
10.3658	0.815579	0.676621	0.983075
14.062	0.857548	0.652268	1.12743
12.6246	0.847841	0.665436	1.08024
4.57507	0.793092	0.649015	0.969154
5.67846	0.756731	0.611846	0.935924
8.3452	0.764804	0.653112	0.895598
16.1976	0.862645	0.631155	1.17904
4.01106	0.830572	0.693821	0.994277
7.73464	0.754172	0.637463	0.892249
11.8799	0.840054	0.671157	1.05145
14.6753	0.860005	0.64627	1.14443
8.97218	0.781472	0.667589	0.914782
15.6226	0.86218	0.636869	1.1672
10.489	0.818087	0.6766	0.989162
10.7847	0.823754	0.676305	1.00335
16.4659	0.862659	0.628498	1.18406
12.4329	0.846045	0.667014	1.07313
6.40401	0.748719	0.611977	0.916015
15.0613	0.861115	0.642448	1.15421
1.03767	1.24149	0.978864	1.57458
16.4276	0.862665	0.628877	1.18336
16.0032	0.862556	0.633085	1.1752
11.5376	0.835665	0.673311	1.03717
16.1948	0.862644	0.631183	1.17899
2.67769	0.956358	0.809211	1.13026
16.2222	0.862652	0.630911	1.17951
9.25419	0.789172	0.67162	0.9273
16.6794	0.862581	0.626389	1.18784
14.9545	0.86084	0.643508	1.15157
10.4589	0.817482	0.676611	0.987683
8.50674	0.768667	0.657251	0.898971
13.4432	0.854113	0.658151	1.10842
16.3564	0.862668	0.629582	1.18205
12.8819	0.850046	0.66323	1.08948
11.1543	0.830027	0.675199	1.02036
10.2891	0.813976	0.676601	0.979243
16.5234	0.862646	0.627929	1.1851
16.318	0.862667	0.629961	1.18133
16.9669	0.8624	0.623573	1.1927
16.1784	0.862639	0.631346	1.17867
2.21224	1.0175	0.850328	1.21754
3.26908	0.892816	0.757474	1.05234
14.3768	0.85892	0.649203	1.13638
6.11379	0.750847	0.610296	0.923767
16.2058	0.862647	0.631074	1.1792
4.16439	0.81954	0.681042	0.986203
10.092	0.809701	0.676402	0.96927
16.9642	0.862402	0.623599	1.19265
4.65721	0.788728	0.643795	0.966289
14.9436	0.860811	0.643616	1.1513
12.6766	0.848305	0.664998	1.08214
10.6916	0.822028	0.676443	0.998948
5.19385	0.767704	0.620607	0.949665
9.70321	0.800639	0.67518	0.949411
13.3666	0.853614	0.658862	1.10593
12.7916	0.849298	0.664014	1.08628
16.6384	0.862602	0.626794	1.18713
13.5199	0.854595	0.657436	1.11088
16.2249	0.862652	0.630884	1.17957
14.407	0.859039	0.648908	1.13721
16.4303	0.862664	0.62885	1.18341
9.56357	0.797185	0.674374	0.942361
8.90647	0.779628	0.666392	0.912106
6.56828	0.748094	0.613745	0.911851
6.84755	0.747927	0.617906	0.905307
15.409	0.861849	0.638993	1.16243
16.0798	0.862599	0.632324	1.17673
16.6165	0.862612	0.62701	1.18674
11.9976	0.841437	0.670335	1.05621
11.3843	0.833507	0.674142	1.03055
9.47596	0.794965	0.673741	0.938
11.1954	0.830671	0.675029	1.0222
9.70595	0.800706	0.675193	0.94955
10.0619	0.809029	0.676351	0.967735
8.30139	0.763826	0.651969	0.894874
11.5595	0.835963	0.673185	1.0381
11.7649	0.838642	0.671922	1.04673
1.33063	1.17175	0.939515	1.4614
10.4014	0.816313	0.676622	0.984843
16.8109	0.8625	0.625095	1.19007
5.31979	0.764347	0.617518	0.946087
16.8191	0.862495	0.625014	1.19021
11.1324	0.82968	0.675287	1.01937
16.0251	0.862569	0.632867	1.17564
16.715	0.862561	0.626038	1.18845
10.27	0.81357	0.676591	0.978281
9.24324	0.78888	0.671493	0.926788
16.9341	0.862421	0.623892	1.19215
2.28343	1.00746	0.843996	1.20258
14.3111	0.858654	0.649846	1.13456
12.9915	0.850917	0.662265	1.09331
16.2824	0.862663	0.630314	1.18066
6.16581	0.750366	0.610451	0.922349
6.4177	0.748652	0.612104	0.915661
5.8619	0.753833	0.61054	0.930756
1.67013	1.10455	0.901604	1.35317
4.7722	0.783175	0.637286	0.962462
16.4467	0.862662	0.628687	1.18371
15.984	0.862543	0.633275	1.17481
12.4932	0.846624	0.666524	1.07539
8.79696	0.776518	0.664152	0.907895
3.4799	0.873447	0.739195	1.03208
6.98719	0.748247	0.620456	0.902359
16.7698	0.862526	0.625498	1.18937
16.6466	0.862598	0.626713	1.18727
16.2989	0.862665	0.630151	1.18097
11.3597	0.833149	0.674267	1.02947
2.62567	0.962703	0.813814	1.13883
7.36228	0.750362	0.628479	0.895882
15.0778	0.861155	0.642285	1.15461
13.7471	0.855928	0.65529	1.118
13.895	0.856721	0.653878	1.12249
16.6219	0.86261	0.626956	1.18684
14.3303	0.858732	0.649658	1.13509
2.2451	1.01283	0.8474	1.21056
16.1675	0.862636	0.631454	1.17845
12.1509	0.843148	0.669212	1.06229
16.7588	0.862533	0.625606	1.18919
11.5349	0.835627	0.673326	1.03705
16.0497	0.862583	0.632623	1.17614
1.95762	1.05585	0.873523	1.27622
7.63881	0.753035	0.635105	0.892861
6.78732	0.747871	0.616897	0.906651
14.8697	0.860604	0.644348	1.14944
0.402475	1.46332	1.08132	1.98026
16.9313	0.862423	0.623918	1.1921
0.65984	1.35674	1.04153	1.76735
16.8656	0.862465	0.624559	1.19099
5.79345	0.75484	0.61091	0.93268
8.96671	0.781319	0.667493	0.914555
16.9478	0.862413	0.623759	1.19238
16.4166	0.862666	0.628985	1.18316
13.8922	0.856707	0.653904	1.12241
10.4808	0.817923	0.676603	0.988759
16.8574	0.86247	0.624639	1.19085
13.9963	0.857231	0.652903	1.1255
16.4495	0.862662	0.62866	1.18376
16.9149	0.862433	0.624078	1.19182
15.4638	0.861942	0.638448	1.16367
16.8328	0.862486	0.62488	1.19044
10.1194	0.810308	0.676444	0.970663
16.4604	0.86266	0.628552	1.18396
14.0483	0.857483	0.652401	1.12703
11.0147	0.827761	0.675712	1.01402
5.34717	0.763668	0.616928	0.945311
4.92279	0.776816	0.630093	0.957704
5.90297	0.75327	0.610383	0.929606
8.5834	0.770633	0.659154	0.900967
8.1864	0.761406	0.64895	0.893349
16.7753	0.862523	0.625444	1.18947
6.68601	0.747889	0.615334	0.908999
9.91677	0.80572	0.676011	0.960317
14.2454	0.858377	0.650487	1.13271
5.32253	0.764278	0.617458	0.94601
16.7205	0.862558	0.625984	1.18854
3.95356	0.834852	0.698659	0.997594
11.4035	0.833784	0.674043	1.03138
3.63597	0.860028	0.725734	1.01917
16.7643	0.86253	0.625552	1.18928
16.5973	0.86262	0.627199	1.18641
9.42942	0.793769	0.673361	0.935709
13.1968	0.852447	0.660419	1.10031
2.26426	1.01014	0.845697	1.20655
16.7561	0.862535	0.625633	1.18914
3.02267	0.91749	0.778927	1.0807
11.3816	0.833467	0.674156	1.03043
16.4714	0.862658	0.628444	1.18416
16.893	0.862447	0.624292	1.19145
3.19242	0.900244	0.764139	1.06059
8.22747	0.762245	0.65003	0.893832
16.1647	0.862635	0.631481	1.1784
16.2277	0.862653	0.630857	1.17962
7.93177	0.756875	0.642345	0.891827
2.36009	0.996946	0.837216	1.18715
16.6877	0.862577	0.626308	1.18798
8.54507	0.76964	0.658208	0.899937
12.4576	0.846284	0.666814	1.07406
16.3016	0.862665	0.630124	1.18102
3.52919	0.869129	0.734936	1.02782
10.5136	0.818579	0.676588	0.990368
4.72566	0.785347	0.639811	0.963988
1.08148	1.23019	0.972486	1.55619
16.0881	0.862603	0.632242	1.1769
6.82839	0.747904	0.617579	0.90573
9.73606	0.801437	0.675337	0.951083
5.85095	0.753988	0.61059	0.931063
16.9697	0.862399	0.623546	1.19274
1.34158	1.16939	0.938181	1.45757
11.7621	0.838607	0.67194	1.04662
7.20074	0.749233	0.624845	0.898382
15.5706	0.862107	0.637386	1.16606
15.242	0.861527	0.640654	1.15855
15.9101	0.862489	0.63401	1.1733
15.1818	0.861397	0.641252	1.15712
15.8937	0.862475	0.634173	1.17297
15.6691	0.862241	0.636406	1.16822
15.0504	0.861088	0.642557	1.15394
11.9483	0.840865	0.670683	1.05423
15.2283	0.861498	0.64079	1.15823
15.3023	0.861649	0.640055	1.15996
15.6089	0.862161	0.637005	1.1669
15.5295	0.862047	0.637795	1.16515
11.6663	0.837382	0.672546	1.04262
4.32318	0.808662	0.668018	0.978916
9.86475	0.804505	0.675848	0.957655
2.13284	1.02903	0.857453	1.23495
10.9079	0.825945	0.676029	1.00911
3.44705	0.876368	0.742038	1.03502
13.2379	0.852737	0.660045	1.10168
0.495565	1.42102	1.06964	1.88783
13.2844	0.85306	0.659619	1.10323
15.8882	0.862471	0.634228	1.17285
8.66006	0.772679	0.661004	0.903222
12.7231	0.848712	0.664602	1.08383
13.1913	0.852408	0.660469	1.10013
8.37258	0.765431	0.653823	0.896091
15.9676	0.862532	0.633439	1.17448
7.49096	0.751492	0.631515	0.894261
13.539	0.854713	0.657256	1.11149
15.1243	0.861266	0.641823	1.15574
15.0449	0.861074	0.642611	1.15381
7.05016	0.748476	0.621693	0.901115
15.0559	0.861102	0.642503	1.15407
15.2585	0.861561	0.64049	1.15894
0.605082	1.37692	1.05128	1.80344
15.2557	0.861556	0.640518	1.15887
0.969226	1.25987	0.989215	1.60457
13.4542	0.854183	0.658049	1.10877
15.2064	0.861451	0.641007	1.15771
6.51626	0.748248	0.613127	0.913148
8.39996	0.76607	0.654531	0.896616
15.9648	0.86253	0.633466	1.17442
8.67375	0.773053	0.661329	0.903652
15.8334	0.862421	0.634772	1.17171
15.9703	0.862534	0.633411	1.17454
13.7033	0.855682	0.655706	1.11665
15.1134	0.861241	0.641932	1.15547
6.55186	0.748138	0.613544	0.912258
15.8416	0.862429	0.63469	1.17188
15.6308	0.862191	0.636787	1.16738
15.8772	0.862461	0.634336	1.17263
5.79893	0.754756	0.610876	0.932525
0.394261	1.46731	1.08201	1.98981
13.3145	0.853265	0.659342	1.10422
7.21443	0.749316	0.625144	0.898151
15.5925	0.862139	0.637168	1.16654
3.77286	0.848844	0.714	1.00915
15.1407	0.861304	0.64166	1.15613
13.8649	0.856564	0.654166	1.12158
15.0285	0.861033	0.642774	1.1534
1.45658	1.14538	0.924667	1.41878
15.6828	0.862258	0.63627	1.16851
14.5028	0.859403	0.647968	1.13983
15.2776	0.8616	0.6403	1.15939
6.37389	0.748878	0.611714	0.916799
15.5651	0.8621	0.637441	1.16594
15.5487	0.862075	0.637604	1.16557
7.84963	0.755677	0.640295	0.891851
2.77626	0.944684	0.800509	1.11483
6.11653	0.750821	0.610302	0.923693
15.201	0.861439	0.641062	1.15758
8.37531	0.765495	0.653894	0.896142
15.6281	0.862187	0.636814	1.16732
8.83529	0.777612	0.664972	0.909332
10.8531	0.824984	0.676164	1.00656
15.8006	0.862389	0.635099	1.17102
12.6109	0.847717	0.665551	1.07974
15.6582	0.862227	0.636515	1.16798
10.8422	0.824789	0.676189	1.00605
12.8737	0.849979	0.663301	1.0892
3.48264	0.873205	0.738958	1.03184
15.1845	0.861403	0.641225	1.15718
15.6993	0.862278	0.636106	1.16887
6.80375	0.747881	0.617167	0.906281
15.316	0.861676	0.639919	1.16028
8.60804	0.771282	0.659755	0.901663
15.869	0.862454	0.634418	1.17246
14.4617	0.85925	0.648371	1.13871
15.305	0.861655	0.640028	1.16003
15.6199	0.862176	0.636896	1.16714
12.4904	0.846598	0.666547	1.07529
15.7924	0.862381	0.63518	1.17085
15.0723	0.861142	0.64234	1.15448
4.69554	0.786807	0.641524	0.964992
10.8805	0.825467	0.676099	1.00783
13.8046	0.856243	0.654742	1.11976
14.4426	0.859177	0.648559	1.13819
15.9347	0.862508	0.633765	1.17381
12.5096	0.84678	0.66639	1.076
15.0312	0.86104	0.642747	1.15347
12.1619	0.843267	0.66913	1.06272
15.6253	0.862184	0.636842	1.16726
12.7012	0.848522	0.664788	1.08303
15.5624	0.862096	0.637468	1.16588
15.5815	0.862123	0.637277	1.1663
13.6842	0.855573	0.655888	1.11605
14.9162	0.860735	0.643887	1.15061
5.50049	0.760171	0.614115	0.940964
15.5843	0.862127	0.63725	1.16636
8.67649	0.773128	0.661393	0.903739
7.19527	0.7492	0.624726	0.898474
10.4342	0.816983	0.676617	0.986468
5.328	0.764141	0.617338	0.945854
15.8115	0.8624	0.63499	1.17125
10.5985	0.820246	0.676532	0.994489
3.72358	0.85281	0.718214	1.01263
9.53893	0.796564	0.674206	0.941128
10.8093	0.824201	0.676258	1.00451
8.38079	0.765622	0.654036	0.896245
4.00285	0.831179	0.694511	0.99474
15.3379	0.861718	0.639701	1.16079
15.8964	0.862477	0.634146	1.17302
12.6711	0.848257	0.665044	1.08194
11.9346	0.840705	0.670779	1.05368
15.9512	0.86252	0.633602	1.17415
14.9984	0.860956	0.643073	1.15266
15.2366	0.861516	0.640708	1.15842
15.2667	0.861578	0.640409	1.15913
15.5076	0.862013	0.638013	1.16466
15.7184	0.8623	0.635916	1.16928
15.472	0.861956	0.638367	1.16386
11.3733	0.833348	0.674198	1.03007
15.1599	0.861348	0.64147	1.15659
15.19	0.861415	0.641171	1.15732
15.8225	0.862411	0.634881	1.17148
15.3214	0.861687	0.639864	1.16041
11.962	0.841025	0.670587	1.05478
15.7376	0.862322	0.635725	1.16969
14.1715	0.858053	0.651206	1.1306
12.3316	0.845041	0.667822	1.06929
3.33479	0.886617	0.751768	1.04566
10.7902	0.823854	0.676295	1.00361
15.0531	0.861095	0.64253	1.15401
15.5049	0.862008	0.63804	1.1646
15.6007	0.86215	0.637087	1.16672
15.7266	0.86231	0.635834	1.16945
15.1982	0.861433	0.641089	1.15751
15.1106	0.861234	0.641959	1.15541
3.34027	0.886107	0.751293	1.04511
11.847	0.839656	0.671379	1.05011
15.1736	0.861379	0.641334	1.15692
15.8143	0.862403	0.634963	1.17131
15.7732	0.862361	0.635371	1.17044
15.5405	0.862063	0.637686	1.16539
7.64976	0.753159	0.635374	0.892779
15.9156	0.862493	0.633956	1.17342
13.1338	0.851992	0.66099	1.09819
15.357	0.861754	0.639511	1.16123
8.12069	0.760124	0.647225	0.892717
5.41288	0.762106	0.615621	0.943448
3.20064	0.899438	0.763424	1.05968
7.97558	0.757569	0.64346	0.891914
8.69018	0.773504	0.661715	0.904179
15.2831	0.861611	0.640246	1.15951
7.2911	0.749824	0.62685	0.896924
15.7075	0.862287	0.636024	1.16904
15.7787	0.862367	0.635316	1.17056
15.1024	0.861215	0.642041	1.15521
15.9073	0.862486	0.634037	1.17325
15.5897	0.862135	0.637196	1.16648
14.4727	0.859291	0.648264	1.13901
3.2417	0.895444	0.759853	1.05523
15.0476	0.861081	0.642584	1.15387
12.1126	0.84273	0.669498	1.06079
15.2092	0.861457	0.64098	1.15777
3.72905	0.852366	0.717746	1.01224
15.4748	0.86196	0.63834	1.16392
5.50323	0.760113	0.614072	0.940886
15.3324	0.861708	0.639756	1.16066
4.16165	0.819732	0.681268	0.986338
12.9148	0.850312	0.662942	1.09064
15.5542	0.862083	0.63755	1.16569
15.0175	0.861005	0.642883	1.15313
15.127	0.861273	0.641796	1.1558
7.59227	0.752521	0.633967	0.893245
15.8718	0.862456	0.634391	1.17251
15.7814	0.86237	0.635289	1.17062
10.8394	0.824741	0.676195	1.00592
10.8833	0.825515	0.676093	1.00796
12.5534	0.84719	0.666029	1.07763
10.6149	0.820564	0.676518	0.995281
3.78381	0.847971	0.713065	1.0084
9.80451	0.80308	0.675629	0.954575
15.5514	0.862079	0.637577	1.16563
15.5158	0.862025	0.637931	1.16484
15.4529	0.861924	0.638557	1.16342
15.1681	0.861367	0.641388	1.15679
11.3241	0.832625	0.674442	1.02791
15.3351	0.861713	0.639728	1.16073
15.6445	0.862209	0.636651	1.16768
4.21367	0.816106	0.676976	0.983831
11.4965	0.835099	0.673542	1.03541
15.4884	0.861982	0.638203	1.16423
15.2201	0.861481	0.640871	1.15803
11.3049	0.83234	0.674534	1.02706
13.8183	0.856317	0.654612	1.12017
15.6034	0.862154	0.637059	1.16678
15.0367	0.861054	0.642693	1.1536
15.086	0.861175	0.642204	1.15481
11.7457	0.8384	0.672045	1.04593
6.52721	0.748213	0.613253	0.912873
12.7779	0.849182	0.664133	1.08579
0.821378	1.30299	1.0132	1.67566
6.65864	0.747919	0.614942	0.909651
10.3411	0.815067	0.676618	0.981847
15.3515	0.861744	0.639565	1.16111
8.25211	0.762762	0.650677	0.894154
7.13503	0.748867	0.623438	0.89953
15.1626	0.861354	0.641443	1.15666
15.7157	0.862297	0.635943	1.16922
15.1216	0.86126	0.641851	1.15567
15.0257	0.861026	0.642802	1.15334
15.2858	0.861617	0.640218	1.15958
15.7951	0.862384	0.635153	1.17091
15.0695	0.861135	0.642367	1.15441
8.36984	0.765368	0.653752	0.89604
15.4693	0.861951	0.638394	1.1638
15.6883	0.862264	0.636215	1.16863
12.7396	0.848854	0.664462	1.08442
6.64768	0.747934	0.614789	0.909914
15.4775	0.861965	0.638312	1.16398
15.3652	0.86177	0.639429	1.16142
15.765	0.862352	0.635453	1.17027
7.77297	0.754657	0.638408	0.892074
15.6774	0.862251	0.636324	1.16839
15.8608	0.862447	0.6345	1.17228
15.7212	0.862303	0.635888	1.16934
15.702	0.862281	0.636079	1.16892
15.3981	0.861829	0.639102	1.16218
15.6801	0.862254	0.636297	1.16845
8.43281	0.766851	0.655375	0.897289
15.7841	0.862372	0.635262	1.17068
10.9325	0.826371	0.675962	1.01025
7.71274	0.753902	0.636923	0.892367
15.1517	0.86133	0.641551	1.1564
15.4309	0.861887	0.638775	1.16293
15.88	0.862464	0.634309	1.17268
15.9293	0.862504	0.633819	1.1737
5.39098	0.762616	0.616039	0.944069
15.9867	0.862545	0.633248	1.17487
15.2749	0.861595	0.640327	1.15932
15.7595	0.862346	0.635507	1.17015
12.2714	0.844425	0.668293	1.06698
0.533896	1.40496	1.06353	1.85602
4.92005	0.776923	0.630211	0.957788
13.6458	0.855351	0.656251	1.11486
15.2475	0.861538	0.640599	1.15868
2.39295	0.992532	0.834318	1.18075
4.94196	0.776076	0.629281	0.957116
15.2694	0.861584	0.640382	1.15919
4.12332	0.822442	0.684446	0.988261
15.5678	0.862104	0.637413	1.166
0.123207	1.63252	0.970636	2.74574
8.0495	0.758822	0.645367	0.892223
15.8389	0.862427	0.634718	1.17183
15.0641	0.861122	0.642421	1.15428
12.9093	0.850268	0.66299	1.09045
13.6075	0.855126	0.656613	1.11366
6.78184	0.747868	0.616808	0.906775
15.0887	0.861182	0.642177	1.15488
15.7102	0.862291	0.635997	1.1691
6.44782	0.748513	0.612395	0.914886
15.075	0.861149	0.642313	1.15454
12.0962	0.842549	0.66962	1.06014
15.2037	0.861445	0.641035	1.15764
11.4555	0.834524	0.673768	1.03364
8.89826	0.779397	0.666235	0.911779
1.99869	1.04938	0.869704	1.26619
15.1708	0.861373	0.641361	1.15686
9.05432	0.783751	0.66894	0.918268
15.7431	0.862328	0.63567	1.1698
15.65	0.862216	0.636596	1.1678
8.54233	0.76957	0.65814	0.899866
15.3707	0.86178	0.639374	1.16155
15.3543	0.861749	0.639538	1.16117
14.5521	0.859582	0.647483	1.14116
4.44639	0.800642	0.658192	0.973923
2.93779	0.926553	0.786341	1.09177
15.034	0.861047	0.64272	1.15354
15.2393	0.861521	0.640681	1.15848
12.2166	0.843852	0.668714	1.06486
8.14533	0.760596	0.647871	0.892934
15.5377	0.862059	0.637713	1.16533
9.82368	0.803536	0.675702	0.955554
10.949	0.826652	0.675916	1.011
15.8991	0.86248	0.634119	1.17308
3.64144	0.85957	0.725263	1.01875
5.80714	0.754632	0.610825	0.932294
6.68875	0.747887	0.615374	0.908934
9.6594	0.799567	0.674952	0.947189
12.8135	0.849482	0.663825	1.08706
11.7046	0.837877	0.672307	1.04422
15.1325	0.861285	0.641742	1.15594
15.2804	0.861606	0.640273	1.15945
1.83989	1.07502	0.884705	1.30628
15.1489	0.861323	0.641579	1.15633
15.0203	0.861012	0.642856	1.1532
4.98302	0.774543	0.627616	0.955866
15.7349	0.862319	0.635752	1.16963
13.1201	0.851891	0.661113	1.09772
15.3735	0.861785	0.639347	1.16161
15.2968	0.861639	0.640109	1.15983
15.0668	0.861129	0.642394	1.15434
1.91929	1.06198	0.877123	1.2858
13.4295	0.854025	0.658279	1.10798
15.8526	0.862439	0.634581	1.17211
4.66543	0.788311	0.6433	0.966009
8.90373	0.779551	0.66634	0.911997
15.1462	0.861317	0.641606	1.15627
7.68262	0.753541	0.636181	0.892551
9.03789	0.783298	0.668682	0.917559
3.35396	0.884837	0.750105	1.04377
15.6062	0.862158	0.637032	1.16684
7.66619	0.753349	0.635778	0.892661
15.5432	0.862067	0.637659	1.16545
2.17939	1.02223	0.853267	1.22465
15.5268	0.862042	0.637822	1.16509
12.5315	0.846985	0.66621	1.07681
13.049	0.851359	0.661752	1.09529
9.59095	0.79787	0.674551	0.943735
14.2317	0.858318	0.65062	1.13232
15.7047	0.862284	0.636052	1.16898
6.40127	0.748733	0.611953	0.916086
10.2344	0.81281	0.676568	0.976488
10.8312	0.824594	0.676213	1.00553
14.73	0.860182	0.645729	1.14586
15.6609	0.86223	0.636487	1.16804
10.1796	0.811628	0.676518	0.973721
15.1654	0.861361	0.641415	1.15673
4.40806	0.803069	0.661169	0.975424
15.8362	0.862424	0.634745	1.17177
13.0982	0.851729	0.66131	1.09698
8.12343	0.760176	0.647297	0.89274
15.9539	0.862522	0.633575	1.1742
15.4912	0.861987	0.638176	1.16429
7.40335	0.750701	0.629437	0.895327
13.5473	0.854763	0.657179	1.11175
5.22944	0.76671	0.619664	0.94865
12.7834	0.849228	0.664085	1.08599
11.7402	0.838331	0.672081	1.04571
10.1166	0.810248	0.67644	0.970524
15.3433	0.861729	0.639647	1.16092
15.2229	0.861487	0.640844	1.1581
15.8909	0.862473	0.6342	1.17291
4.26021	0.812912	0.673155	0.981684
15.3187	0.861682	0.639892	1.16035
12.2741	0.844453	0.668271	1.06708
9.0242	0.782919	0.668462	0.916973
15.3762	0.86179	0.63932	1.16167
7.28288	0.749766	0.626664	0.89705
1.70847	1.09767	0.897693	1.3422
3.73453	0.851923	0.717277	1.01184
13.3748	0.853668	0.658786	1.1062
8.56697	0.770205	0.65875	0.900517
15.4967	0.861995	0.638122	1.16441
9.22133	0.788294	0.671234	0.925769
15.8033	0.862392	0.635071	1.17108
8.33151	0.764495	0.652755	0.895363
12.1098	0.8427	0.669518	1.06068
6.34104	0.749068	0.611449	0.91766
13.4377	0.854078	0.658202	1.10824
8.18092	0.761296	0.648806	0.89329
10.5602	0.819498	0.67656	0.992634
15.8499	0.862437	0.634609	1.17206
14.4508	0.859208	0.648479	1.13842
12.1947	0.843619	0.668881	1.06401
1.24028	1.1919	0.950868	1.49403
9.85379	0.804248	0.675811	0.957094
9.08991	0.78473	0.669477	0.919823
15.0997	0.861208	0.642068	1.15514
11.1926	0.830628	0.67504	1.02208
7.74559	0.754309	0.637733	0.892194
1.05136	1.23792	0.97685	1.56877
13.1037	0.85177	0.661261	1.09716
0.249151	1.54635	1.07256	2.22942
15.4556	0.861929	0.63853	1.16349
15.4173	0.861863	0.638911	1.16261
15.3132	0.861671	0.639946	1.16022
5.22122	0.766936	0.619876	0.948883
7.40061	0.750678	0.629373	0.895363
15.2448	0.861533	0.640627	1.15861
15.3242	0.861692	0.639837	1.16047
13.8238	0.856347	0.654559	1.12034
4.95291	0.775661	0.628827	0.956781
15.7622	0.862349	0.63548	1.17021
11.9401	0.840769	0.670741	1.0539
4.78316	0.782679	0.636713	0.962107
15.817	0.862406	0.634935	1.17137
15.1298	0.861279	0.641769	1.15587
15.9457	0.862516	0.633656	1.17403
15.2612	0.861567	0.640463	1.159
5.81535	0.754508	0.610777	0.932063
0.58044	1.38638	1.0556	1.82082
1.03494	1.24221	0.979269	1.57575
15.8581	0.862444	0.634527	1.17223
5.86464	0.753794	0.610528	0.930679
15.4008	0.861834	0.639075	1.16224
14.4699	0.859281	0.648291	1.13894
15.2941	0.861633	0.640137	1.15977
6.86124	0.747947	0.618144	0.905007
7.75654	0.754447	0.638003	0.892143
15.9731	0.862536	0.633384	1.17459
15.3598	0.86176	0.639483	1.1613
15.3899	0.861815	0.639184	1.16199
12.4603	0.84631	0.666792	1.07416
3.26635	0.893078	0.757712	1.05263
8.06319	0.759066	0.645723	0.892303
14.9326	0.860781	0.643725	1.15103
12.5233	0.846909	0.666277	1.07651
15.7239	0.862306	0.635861	1.16939
3.26087	0.893602	0.758187	1.0532
8.47662	0.767918	0.656491	0.898257
7.14599	0.748924	0.62367	0.899334
15.932	0.862506	0.633792	1.17375
4.61614	0.790868	0.646344	0.967706
7.74285	0.754274	0.637665	0.892208
15.2995	0.861644	0.640082	1.1599
9.97153	0.806982	0.676158	0.963119
7.80583	0.755085	0.639217	0.891957
15.5459	0.862071	0.637631	1.16551
15.7568	0.862343	0.635534	1.1701
15.1435	0.861311	0.641633	1.1562
15.5323	0.862051	0.637768	1.16521
15.4665	0.861947	0.638421	1.16373
15.7978	0.862387	0.635126	1.17097
12.3699	0.845426	0.667518	1.07075
5.06516	0.771678	0.624586	0.95341
13.0353	0.851255	0.661875	1.09482
2.61198	0.964392	0.815023	1.14114
15.9758	0.862538	0.633357	1.17465
4.49841	0.797482	0.654332	0.971948
3.80298	0.846453	0.71143	1.0071
5.9632	0.752499	0.610237	0.927926
15.0093	0.860984	0.642965	1.15293
13.0709	0.851524	0.661556	1.09604
15.4364	0.861896	0.638721	1.16305
3.16504	0.90295	0.766521	1.06366
8.59435	0.770921	0.659421	0.901273
12.9121	0.85029	0.662966	1.09054
7.51013	0.751677	0.631976	0.894051
0.0574964	1.68304	0.789476	3.58799
15.587	0.862131	0.637223	1.16642
7.71547	0.753936	0.63699	0.892351
15.9895	0.862547	0.633221	1.17492
15.4583	0.861933	0.638503	1.16355
13.1174	0.851871	0.661138	1.09763
11.5623	0.836	0.673169	1.03822
15.4392	0.861901	0.638694	1.16311
11.6937	0.837736	0.672375	1.04377
15.6472	0.862213	0.636624	1.16774
15.4939	0.861991	0.638149	1.16435
3.08564	0.910959	0.773436	1.07294
8.09057	0.759562	0.646437	0.892484
1.18005	1.20596	0.958803	1.51683
14.8587	0.860573	0.644457	1.14916
7.78666	0.754834	0.638745	0.892021
0.999343	1.25167	0.984601	1.59118
15.42	0.861868	0.638884	1.16268
15.5733	0.862111	0.637359	1.16612
8.14807	0.760649	0.647943	0.89296
14.2619	0.858447	0.650327	1.13317
13.2242	0.852641	0.66017	1.10123
7.72369	0.754036	0.637193	0.892306
2.35188	0.998059	0.837941	1.18877
8.32603	0.764373	0.652613	0.895271
11.6636	0.837346	0.672562	1.0425
12.8162	0.849505	0.663801	1.08716
15.9375	0.86251	0.633738	1.17387
11.1735	0.830329	0.675121	1.02122
15.5103	0.862017	0.637985	1.16472
15.0942	0.861195	0.642122	1.15501
0.279268	1.52842	1.07944	2.16416
15.6856	0.862261	0.636242	1.16857
4.02749	0.829364	0.692443	0.993359
3.65239	0.858658	0.724321	1.01791
8.91469	0.77986	0.666547	0.912435
12.7889	0.849275	0.664038	1.08618
5.88106	0.753566	0.610461	0.930219
15.0066	0.860977	0.642992	1.15286
5.42109	0.761918	0.615468	0.943215
2.12737	1.02984	0.857947	1.23618
2.19582	1.01986	0.851796	1.22108
9.84832	0.804119	0.675791	0.956814
7.32121	0.750044	0.627534	0.896471
15.9484	0.862518	0.633629	1.17409
5.64013	0.757418	0.612248	0.937009
10.1906	0.811866	0.67653	0.974275
11.2501	0.831514	0.674789	1.02464
14.6698	0.859987	0.646324	1.14428
14.6671	0.859978	0.646351	1.14421
7.87975	0.756101	0.641039	0.891814
9.92498	0.80591	0.676035	0.960737
14.1441	0.85793	0.651472	1.12982
7.11861	0.748784	0.623094	0.899828
12.8272	0.849596	0.663707	1.08755
11.7567	0.838538	0.671975	1.04639
14.051	0.857496	0.652374	1.12711
14.2235	0.858282	0.6507	1.13209
6.74899	0.747861	0.616285	0.907527
14.96	0.860855	0.643453	1.15171
14.9381	0.860796	0.64367	1.15116
14.2509	0.8584	0.650434	1.13286
4.15617	0.820118	0.681722	0.986609
14.3604	0.858855	0.649364	1.13593
7.77571	0.754692	0.638475	0.892063
13.5007	0.854476	0.657615	1.11027
14.6808	0.860023	0.646216	1.14457
14.574	0.859659	0.647268	1.14174
14.0127	0.857312	0.652745	1.12599
7.77023	0.754621	0.63834	0.892085
9.9195	0.805784	0.676019	0.960457
9.67583	0.79997	0.67504	0.948021
3.34848	0.885344	0.75058	1.04431
14.3221	0.858699	0.649739	1.13486
5.08159	0.771136	0.624027	0.952925
14.2673	0.85847	0.650273	1.13333
14.2427	0.858365	0.650514	1.13263
14.0373	0.857431	0.652507	1.12671
6.94612	0.748126	0.619677	0.9032
8.58066	0.770562	0.659086	0.900891
14.5137	0.859443	0.64786	1.14013
14.3248	0.85871	0.649712	1.13494
14.6479	0.859914	0.64654	1.14371
11.1242	0.829548	0.675319	1.019
14.8724	0.860612	0.644321	1.14951
14.8341	0.860501	0.644701	1.14854
13.7937	0.856184	0.654847	1.11942
11.5814	0.836259	0.673057	1.03903
14.0538	0.857509	0.652348	1.12719
3.47443	0.873931	0.739669	1.03256
6.37937	0.748848	0.61176	0.916656
10.2316	0.812752	0.676566	0.97635
14.9737	0.860891	0.643318	1.15205
8.41638	0.766458	0.654954	0.896947
14.5493	0.859572	0.64751	1.14108
12.8381	0.849687	0.663611	1.08794
14.3577	0.858844	0.649391	1.13585
8.73946	0.774879	0.662858	0.905832
6.66959	0.747906	0.615097	0.90939
8.49305	0.768325	0.656906	0.898642
10.3138	0.814495	0.67661	0.980478
14.7602	0.860277	0.645432	1.14664
14.5931	0.859727	0.647079	1.14226
6.21235	0.749973	0.610646	0.921089
14.344	0.858788	0.649525	1.13547
14.5548	0.859592	0.647456	1.14123
14.2263	0.858294	0.650674	1.13216
14.7246	0.860165	0.645783	1.14571
10.0181	0.808043	0.676265	0.965499
14.0565	0.857522	0.652321	1.12727
13.6486	0.855367	0.656225	1.11494
14.459	0.859239	0.648398	1.13864
2.72697	0.95046	0.804853	1.12241
13.6787	0.855542	0.65594	1.11588
14.6452	0.859905	0.646567	1.14363
14.3988	0.859007	0.648989	1.13699
4.50115	0.79732	0.654135	0.971846
14.0757	0.857613	0.652136	1.12783
14.1633	0.858016	0.651286	1.13037
1.0322	1.24293	0.979674	1.57692
14.4207	0.859092	0.648774	1.13759
14.5904	0.859717	0.647106	1.14218
0.487351	1.42456	1.07088	1.89504
14.7054	0.860103	0.645972	1.14522
13.3419	0.85345	0.65909	1.10512
11.6909	0.837701	0.672393	1.04365
10.9462	0.826605	0.675924	1.01088
14.2701	0.858482	0.650247	1.1334
14.8916	0.860666	0.644131	1.14999
14.6123	0.859793	0.64689	1.14277
8.52316	0.769082	0.657662	0.899377
14.626	0.85984	0.646755	1.14313
14.7684	0.860302	0.64535	1.14685
12.0606	0.842152	0.669881	1.05873
14.5165	0.859453	0.647833	1.1402
13.331	0.853376	0.659191	1.10476
14.7383	0.860208	0.645648	1.14607
14.6506	0.859923	0.646513	1.14378
2.34366	0.999174	0.838666	1.1904
8.64637	0.772308	0.660678	0.9028
14.804	0.860411	0.644998	1.14777
10.4917	0.818142	0.676599	0.989296
14.7793	0.860336	0.645242	1.14713
6.16855	0.750342	0.610461	0.922275
10.0235	0.808166	0.676276	0.965778
14.9491	0.860825	0.643562	1.15144
14.8177	0.860452	0.644863	1.14812
14.2482	0.858389	0.65046	1.13278
13.5993	0.855077	0.65669	1.1134
14.7081	0.860112	0.645945	1.14529
14.6315	0.859858	0.646702	1.14327
14.8779	0.860628	0.644267	1.14965
11.795	0.839017	0.671725	1.04797
14.9217	0.860751	0.643833	1.15075
14.8423	0.860525	0.644619	1.14874
9.16931	0.786893	0.67058	0.923379
14.7985	0.860394	0.645053	1.14762
10.1522	0.81103	0.676487	0.972333
14.8532	0.860557	0.644511	1.14902
14.396	0.858996	0.649015	1.13691
5.53882	0.759375	0.613538	0.939878
14.1469	0.857942	0.651446	1.12989
14.5329	0.859513	0.647672	1.14064
14.0948	0.857703	0.65195	1.12839
14.1085	0.857766	0.651818	1.12879
14.8834	0.860643	0.644213	1.14979
14.125	0.857842	0.651658	1.12926
8.09331	0.759613	0.646508	0.892504
5.47311	0.760758	0.614557	0.94174
1.3717	1.16295	0.934556	1.44715
14.3851	0.858953	0.649123	1.13661
14.2974	0.858597	0.649979	1.13417
7.56489	0.752231	0.6333	0.893496
13.9552	0.857028	0.653299	1.12429
9.03515	0.783222	0.668638	0.917442
14.6096	0.859783	0.646917	1.14269
14.1523	0.857967	0.651393	1.13005
5.18289	0.768019	0.620911	0.94998
13.884	0.856664	0.653983	1.12216
14.3933	0.858985	0.649042	1.13684
14.7109	0.860121	0.645918	1.14536
14.7656	0.860294	0.645377	1.14678
7.27467	0.749709	0.62648	0.897178
14.229	0.858306	0.650647	1.13224
14.741	0.860217	0.645621	1.14614
14.7218	0.860156	0.64581	1.14564
14.6068	0.859774	0.646944	1.14262
14.1742	0.858065	0.65118	1.13068
14.9299	0.860773	0.643752	1.15096
10.5492	0.819283	0.676568	0.992102
10.5766	0.81982	0.676549	0.993431
14.2044	0.858199	0.650887	1.13154
12.6875	0.848401	0.664905	1.08254
7.78118	0.754763	0.63861	0.892041
2.18486	1.02144	0.852777	1.22345
2.12463	1.03025	0.858195	1.2368
5.96046	0.752532	0.610241	0.928002
10.4452	0.817205	0.676615	0.987009
14.9409	0.860803	0.643643	1.15123
14.8067	0.860419	0.644971	1.14784
14.1113	0.857779	0.651791	1.12887
10.6177	0.820617	0.676516	0.995412
14.0182	0.857338	0.652692	1.12615
13.999	0.857245	0.652877	1.12559
2.43402	0.987087	0.8307	1.17291
14.9682	0.860877	0.643372	1.15191
5.87833	0.753604	0.610471	0.930296
14.3002	0.858608	0.649953	1.13425
14.4234	0.859103	0.648747	1.13767
14.0209	0.857352	0.652665	1.12623
2.9241	0.928044	0.787538	1.09362
14.4398	0.859166	0.648586	1.13812
7.11039	0.748744	0.622923	0.899979
14.6835	0.860032	0.646189	1.14464
14.7766	0.860327	0.645269	1.14706
14.1907	0.858138	0.65102	1.13115
14.9135	0.860728	0.643914	1.15054
13.6896	0.855604	0.655836	1.11622
7.64703	0.753128	0.635307	0.892799
14.4316	0.859135	0.648667	1.13789
14.5466	0.859562	0.647537	1.14101
10.2672	0.813512	0.676589	0.978143
14.24	0.858353	0.65054	1.13255
2.52984	0.974691	0.822264	1.15537
1.28409	1.182	0.945284	1.47798
13.6184	0.855191	0.656509	1.114
14.5767	0.859669	0.647241	1.14182
5.97415	0.752365	0.610221	0.927621
14.5685	0.85964	0.647322	1.1416
14.9025	0.860697	0.644023	1.15027
14.3385	0.858766	0.649578	1.13532
14.4782	0.859311	0.64821	1.13916
14.7492	0.860243	0.64554	1.14635
14.0784	0.857626	0.652109	1.12791
14.2016	0.858186	0.650913	1.13146
14.6534	0.859932	0.646486	1.14385
14.1304	0.857867	0.651605	1.12942
3.01172	0.918642	0.779883	1.08209
14.0401	0.857444	0.65248	1.12679
14.3741	0.858909	0.64923	1.13631
14.919	0.860743	0.64386	1.15068
14.6424	0.859895	0.646594	1.14356
12.6136	0.847742	0.665528	1.07984
8.40543	0.766199	0.654672	0.896725
14.4946	0.859372	0.648049	1.13961
6.87219	0.747965	0.618336	0.904769
14.6342	0.859868	0.646675	1.14335
9.93319	0.806101	0.676058	0.961158
14.8259	0.860476	0.644782	1.14833
14.6616	0.85996	0.646405	1.14407
14.9518	0.860833	0.643535	1.1515
14.3632	0.858866	0.649337	1.136
14.0729	0.8576	0.652162	1.12775
11.4336	0.834214	0.673885	1.03269
14.1879	0.858126	0.651047	1.13107
6.15212	0.750488	0.610404	0.922721
10.8942	0.825706	0.676065	1.00847
14.5658	0.85963	0.647349	1.14152
12.9696	0.850746	0.662459	1.09255
14.0291	0.857391	0.652586	1.12647
8.40269	0.766134	0.654601	0.896671
12.6656	0.848208	0.66509	1.08174
4.09046	0.824792	0.68718	0.989961
14.1058	0.857754	0.651844	1.12871
13.3337	0.853394	0.659166	1.10485
14.2126	0.858235	0.650807	1.13177
14.3467	0.858799	0.649498	1.13555
11.3295	0.832706	0.674416	1.02815
14.5083	0.859423	0.647914	1.13998
14.689	0.86005	0.646134	1.14479
14.3057	0.858631	0.649899	1.1344
14.971	0.860884	0.643345	1.15198
5.27325	0.76554	0.618585	0.947407
13.257	0.852871	0.65987	1.10232
8.504	0.768599	0.657182	0.898904
7.15146	0.748953	0.623786	0.899236
12.1673	0.843326	0.669089	1.06294
14.2591	0.858435	0.650353	1.13309
14.8971	0.860682	0.644077	1.15013
12.3754	0.84548	0.667475	1.07096
14.3549	0.858833	0.649417	1.13578
14.2098	0.858223	0.650834	1.1317
14.1852	0.858114	0.651073	1.13099
14.1551	0.857979	0.651366	1.13013
14.6014	0.859755	0.646998	1.14247
11.3022	0.832299	0.674547	1.02694
14.8943	0.860674	0.644104	1.15006
6.94886	0.748133	0.619728	0.903144
14.8752	0.86062	0.644294	1.14958
14.2865	0.858551	0.650086	1.13386
3.1185	0.907615	0.770573	1.06903
8.01117	0.75816	0.644374	0.892037
14.2892	0.858563	0.65006	1.13394
9.62381	0.798688	0.67475	0.94539
14.0894	0.857677	0.652003	1.12823
3.29372	0.890474	0.755333	1.04979
13.3227	0.853321	0.659267	1.10449
14.3413	0.858777	0.649551	1.1354
14.4152	0.859071	0.648828	1.13744
10.7984	0.824003	0.676279	1.00399
13.2762	0.853003	0.659694	1.10296
10.9928	0.827395	0.675783	1.01302
14.6041	0.859765	0.646971	1.14255
14.7465	0.860234	0.645567	1.14628
12.0195	0.841688	0.670178	1.05709
14.7821	0.860344	0.645215	1.1472
2.96791	0.923302	0.783708	1.08776
14.7875	0.860361	0.645161	1.14734
4.90089	0.77768	0.631049	0.958381
9.96879	0.80692	0.676151	0.962979
14.845	0.860533	0.644592	1.14881
8.66827	0.772903	0.661199	0.903479
9.38287	0.792563	0.672948	0.93344
14.0675	0.857574	0.652215	1.12759
12.3152	0.844874	0.667951	1.06866
10.9161	0.826087	0.676007	1.00949
14.2536	0.858412	0.650407	1.13294
7.80309	0.755049	0.63915	0.891965
9.99343	0.807483	0.67621	0.964239
1.92476	1.0611	0.876607	1.28442
14.1825	0.858102	0.6511	1.13091
14.856	0.860565	0.644484	1.14909
14.4371	0.859156	0.648613	1.13804
5.64834	0.757268	0.612158	0.936776
14.615	0.859802	0.646863	1.14284
8.99956	0.782235	0.668056	0.915928
10.8997	0.825802	0.676051	1.00872
11.5048	0.835213	0.673497	1.03576
14.5712	0.85965	0.647295	1.14167
4.86529	0.779127	0.632667	0.959491
14.1496	0.857954	0.651419	1.12997
14.281	0.858528	0.65014	1.13371
14.7191	0.860147	0.645837	1.14557
2.9022	0.930446	0.789455	1.09662
3.96725	0.833826	0.697505	0.996789
13.435	0.85406	0.658228	1.10816
3.48812	0.872722	0.738485	1.03136
7.57584	0.752346	0.633567	0.893393
5.23218	0.766636	0.619595	0.948572
14.2071	0.858211	0.65086	1.13162
9.65393	0.799432	0.674922	0.946912
11.3158	0.832503	0.674482	1.02755
14.8012	0.860403	0.645026	1.14769
9.69773	0.800506	0.675153	0.949133
14.0592	0.857535	0.652295	1.12735
6.56281	0.748108	0.613678	0.911986
8.45471	0.767381	0.655934	0.897762
14.114	0.857792	0.651764	1.12895
8.11247	0.759969	0.64701	0.89265
13.6951	0.855636	0.655784	1.11639
9.06801	0.784128	0.66915	0.918863
14.3084	0.858642	0.649872	1.13448
6.46424	0.748443	0.612562	0.914466
10.7683	0.823454	0.676334	1.00258
11.1981	0.830714	0.675017	1.02232
14.0319	0.857404	0.652559	1.12655
12.8491	0.849777	0.663516	1.08832
14.8998	0.86069	0.64405	1.1502
7.79761	0.754977	0.639015	0.891983
14.5302	0.859503	0.647699	1.14057
10.2426	0.812986	0.676574	0.976903
4.90636	0.777462	0.630807	0.958211
14.9901	0.860934	0.643155	1.15246
2.11094	1.03228	0.859433	1.23989
14.7027	0.860094	0.645999	1.14514
14.1934	0.85815	0.650993	1.13123
14.4042	0.859028	0.648935	1.13714
14.8368	0.860509	0.644673	1.1486
3.23897	0.895709	0.760091	1.05552
11.9565	0.840961	0.670626	1.05456
14.166	0.858028	0.65126	1.13044
10.2042	0.812162	0.676543	0.974968
14.0921	0.85769	0.651977	1.12831
8.58614	0.770705	0.659221	0.901043
14.9107	0.86072	0.643942	1.15048
9.39109	0.792777	0.673023	0.933839
14.1277	0.857855	0.651632	1.12934
14.0018	0.857258	0.65285	1.12567
9.62107	0.79862	0.674734	0.945252
14.8642	0.860588	0.644402	1.1493
12.077	0.842336	0.66976	1.05938
3.68525	0.855941	0.7215	1.01543
2.88304	0.932566	0.791133	1.09928
14.8615	0.86058	0.64443	1.14923
12.9066	0.850246	0.663014	1.09035
12.3809	0.845534	0.667431	1.07116
12.2303	0.843996	0.66861	1.06539
0.287482	1.52369	1.08071	2.14825
11.7703	0.83871	0.671886	1.04696
13.8402	0.856434	0.654402	1.12084
14.0866	0.857665	0.65203	1.12815
1.4292	1.15096	0.927807	1.42778
5.2486	0.766193	0.619183	0.948106
1.74406	1.0914	0.894115	1.33221
14.3276	0.858721	0.649685	1.13501
8.49578	0.768393	0.656975	0.898707
14.1167	0.857804	0.651738	1.12902
10.2836	0.81386	0.676598	0.978968
2.1657	1.02422	0.854496	1.22765
1.10065	1.22536	0.969754	1.54833
5.51966	0.759769	0.61382	0.940421
9.02147	0.782843	0.668418	0.916856
11.3761	0.833388	0.674184	1.03019
7.76202	0.754516	0.638138	0.892119
8.05498	0.758919	0.645509	0.892254
6.05629	0.751432	0.610204	0.925347
14.4179	0.859082	0.648801	1.13752
1.15267	1.21254	0.962514	1.5275
9.80999	0.803211	0.67565	0.954854
5.62918	0.757619	0.612372	0.937319
8.73398	0.774725	0.662732	0.905643
1.44289	1.14816	0.926231	1.42326
8.71208	0.774112	0.662226	0.9049
0.936371	1.26902	0.994353	1.61957
14.8396	0.860517	0.644646	1.14867
6.3602	0.748955	0.611601	0.917157
2.71328	0.952086	0.806062	1.12456
14.5849	0.859698	0.64716	1.14204
7.58132	0.752404	0.6337	0.893343
12.6437	0.848013	0.665275	1.08095
14.4124	0.85906	0.648854	1.13737
6.27259	0.749516	0.610974	0.919473
0.991129	1.25389	0.98585	1.5948
12.3672	0.845398	0.66754	1.07064
14.5001	0.859393	0.647995	1.13976
14.3823	0.858942	0.64915	1.13654
7.9701	0.75748	0.643319	0.8919
14.0346	0.857418	0.652533	1.12663
14.5356	0.859523	0.647645	1.14072
14.3659	0.858877	0.64931	1.13608
14.5877	0.859707	0.647133	1.14211
7.02826	0.748391	0.621257	0.901541
14.4918	0.859362	0.648075	1.13953
10.8477	0.824887	0.676177	1.0063
3.00898	0.918931	0.780122	1.08244
2.97339	0.922715	0.78323	1.08704
9.11729	0.785479	0.669873	0.921036
10.0591	0.808968	0.676346	0.967595
8.84898	0.778001	0.665256	0.909855
9.46227	0.794614	0.673633	0.937324
14.8231	0.860468	0.644809	1.14826
12.7587	0.849019	0.664297	1.08511
1.79608	1.08242	0.888968	1.31796
4.10141	0.824006	0.686268	0.989389
14.3194	0.858688	0.649765	1.13479
1.17457	1.20727	0.95954	1.51895
14.2838	0.85854	0.650113	1.13379
0.908991	1.27683	0.998721	1.63239
5.49775	0.760229	0.614158	0.941042
6.60114	0.748017	0.614163	0.911043
14.7848	0.860353	0.645188	1.14727
10.5821	0.819926	0.676545	0.993696
14.5384	0.859533	0.647618	1.14079
14.8149	0.860444	0.64489	1.14805
5.0898	0.770869	0.623753	0.952684
0.531158	1.40609	1.06398	1.8582
14.1222	0.85783	0.651685	1.12918
2.72971	0.950136	0.804611	1.12198
6.45329	0.748489	0.61245	0.914746
14.4343	0.859145	0.64864	1.13797
4.73114	0.785086	0.639506	0.963807
5.34991	0.763601	0.61687	0.945233
6.08093	0.751174	0.610233	0.924669
1.62907	1.11206	0.905864	1.36519
7.48001	0.751388	0.631253	0.894385
11.4856	0.834947	0.673603	1.03494
1.21016	1.19886	0.954797	1.50532
7.23634	0.749453	0.625626	0.89779
0.457234	1.43784	1.07515	1.92286
6.92969	0.748084	0.619372	0.903543
1.85358	1.07274	0.883385	1.30268
14.6233	0.85983	0.646782	1.14306
10.7299	0.822747	0.676394	1.00077
14.6287	0.859849	0.646729	1.1432
2.69959	0.953722	0.807273	1.12674
3.66608	0.857522	0.723145	1.01687
14.5192	0.859463	0.647806	1.14027
3.95083	0.835058	0.69889	0.997756
7.58953	0.752492	0.6339	0.893269
6.66685	0.747909	0.615058	0.909455
3.96999	0.833621	0.697274	0.996629
13.2543	0.852852	0.659895	1.10223
0.418903	1.45548	1.07974	1.96197
14.7629	0.860285	0.645404	1.14671
5.75238	0.755486	0.611198	0.933837
3.94535	0.83547	0.699352	0.998081
6.70518	0.747875	0.615616	0.908547
4.82423	0.780865	0.634635	0.960789
3.79203	0.847319	0.712364	1.00784
1.24302	1.19127	0.950514	1.49301
10.2754	0.813686	0.676594	0.978556
8.94207	0.780629	0.667053	0.913543
13.5336	0.854679	0.657307	1.11132
13.3857	0.85374	0.658685	1.10656
13.3583	0.853559	0.658938	1.10566
10.9791	0.827164	0.675826	1.01239
11.6855	0.83763	0.672427	1.04342
13.7855	0.856139	0.654925	1.11917
11.0612	0.82853	0.675553	1.01615
9.6375	0.799026	0.67483	0.946081
12.8573	0.849845	0.663445	1.08862
13.0763	0.851565	0.661507	1.09623
5.70584	0.756258	0.611586	0.935151
8.34246	0.764742	0.653041	0.89555
13.3091	0.853228	0.659393	1.10404
13.2269	0.85266	0.660145	1.10132
9.72511	0.801172	0.675286	0.950525
1.42372	1.15208	0.92844	1.4296
7.37871	0.750495	0.628861	0.895656
13.7526	0.855959	0.655238	1.11817
1.33337	1.17116	0.939181	1.46044
13.8101	0.856273	0.65469	1.11992
7.80035	0.755013	0.639082	0.891974
13.0599	0.851442	0.661654	1.09567
13.216	0.852583	0.660245	1.10095
13.0435	0.851317	0.661801	1.0951
13.9443	0.856973	0.653404	1.12396
13.9059	0.856777	0.653772	1.12282
12.8518	0.8498	0.663492	1.08842
13.6349	0.855287	0.656354	1.11451
5.82357	0.754386	0.610731	0.931832
12.2276	0.843967	0.668631	1.06528
13.5308	0.854663	0.657333	1.11123
13.7991	0.856214	0.654795	1.11959
6.96255	0.748172	0.619986	0.902861
11.6882	0.837666	0.67241	1.04354
13.3118	0.853247	0.659367	1.10413
5.25134	0.766119	0.619115	0.948028
1.64823	1.10853	0.903867	1.35955
4.87625	0.778676	0.632161	0.959148
13.4843	0.854373	0.657769	1.10974
13.0243	0.851171	0.661972	1.09444
13.5609	0.854847	0.657051	1.11219
5.95499	0.7526	0.610251	0.928154
13.038	0.851275	0.66185	1.09492
8.86267	0.77839	0.665534	0.910383
13.9224	0.856862	0.653615	1.12331
13.1147	0.851851	0.661163	1.09754
13.0544	0.8514	0.661703	1.09548
13.7334	0.855852	0.65542	1.11758
13.3392	0.853431	0.659115	1.10503
13.0928	0.851688	0.66136	1.09679
13.9388	0.856945	0.653457	1.1238
13.5418	0.85473	0.65723	1.11158
4.38068	0.804852	0.663362	0.976522
13.2105	0.852544	0.660294	1.10077
9.75523	0.8019	0.675424	0.952059
13.7608	0.856004	0.65516	1.11842
3.58121	0.864652	0.730448	1.02351
13.2625	0.852909	0.65982	1.1025
13.665	0.855463	0.65607	1.11546
13.7252	0.855806	0.655498	1.11732
13.3638	0.853595	0.658888	1.10584
13.3802	0.853704	0.658736	1.10638
13.1092	0.85181	0.661212	1.09735
13.8813	0.85665	0.654009	1.12208
13.2132	0.852563	0.66027	1.10086
13.5774	0.854946	0.656896	1.11271
13.3446	0.853468	0.659065	1.10521
8.95028	0.780859	0.667202	0.913879
6.76815	0.747863	0.616588	0.907087
2.89399	0.931352	0.790174	1.09775
13.1557	0.852151	0.660792	1.09893
13.6376	0.855303	0.656328	1.1146
13.2488	0.852813	0.659945	1.10205
12.0879	0.842458	0.66968	1.05981
9.18027	0.787189	0.670722	0.923879
3.89881	0.839003	0.703287	1.00091
11.4801	0.83487	0.673633	1.0347
13.8621	0.85655	0.654193	1.1215
8.35615	0.765054	0.653397	0.895791
1.25945	1.18753	0.948406	1.48695
13.9169	0.856834	0.653667	1.12315
9.33085	0.791202	0.672445	0.930932
13.9579	0.857041	0.653272	1.12437
9.16384	0.786744	0.670508	0.92313
2.5408	0.973301	0.8213	1.15343
13.0955	0.851709	0.661335	1.09688
11.461	0.834601	0.673738	1.03387
13.6568	0.855415	0.656147	1.1152
12.9969	0.85096	0.662216	1.0935
13.2078	0.852525	0.660319	1.10068
1.49491	1.13771	0.920349	1.40642
5.60453	0.758082	0.612664	0.938016
13.0818	0.851606	0.661458	1.09642
13.7718	0.856064	0.655056	1.11875
13.6321	0.855271	0.65638	1.11443
9.44584	0.794193	0.673499	0.936515
2.59555	0.966428	0.816473	1.14393
9.66488	0.799701	0.674982	0.947466
7.47454	0.751336	0.631122	0.894448
6.78458	0.747869	0.616853	0.906713
13.383	0.853722	0.65871	1.10647
13.654	0.855399	0.656173	1.11511
6.52174	0.74823	0.613189	0.913011
13.5171	0.854578	0.657461	1.11079
13.5883	0.855012	0.656793	1.11305
10.3275	0.814782	0.676614	0.981163
10.541	0.819121	0.676573	0.991703
8.29865	0.763766	0.651897	0.894831
7.15968	0.748998	0.623961	0.899091
12.1892	0.843561	0.668923	1.06379
13.6294	0.855255	0.656406	1.11434
13.6622	0.855447	0.656096	1.11537
6.90505	0.748027	0.618922	0.904064
13.1585	0.852171	0.660767	1.09902
13.2735	0.852984	0.659719	1.10287
13.5911	0.855028	0.656767	1.11314
13.936	0.856931	0.653483	1.12372
6.30544	0.749292	0.611189	0.9186
13.0407	0.851296	0.661826	1.09501
13.6705	0.855494	0.656018	1.11563
5.27051	0.765612	0.61865	0.947485
13.78	0.856109	0.654977	1.11901
11.0886	0.828976	0.675454	1.01739
13.1311	0.851972	0.661014	1.09809
13.3611	0.853577	0.658913	1.10575
2.20403	1.01868	0.851062	1.2193
13.821	0.856332	0.654585	1.12026
0.95006	1.26518	0.992199	1.61327
11.4007	0.833744	0.674057	1.03126
6.916	0.748051	0.619121	0.903831
10.5629	0.819552	0.676558	0.992767
4.32045	0.808845	0.668241	0.979033
0.391523	1.46864	1.08222	1.99305
13.3994	0.85383	0.658558	1.107
12.0825	0.842397	0.66972	1.0596
8.9804	0.781701	0.667731	0.915124
13.5938	0.855044	0.656742	1.11322
13.1722	0.85227	0.660643	1.09948
10.0263	0.808228	0.676282	0.965918
13.9744	0.857123	0.653114	1.12486
13.8868	0.856679	0.653956	1.12224
13.8265	0.856361	0.654533	1.12042
13.0736	0.851545	0.661532	1.09614
8.88183	0.778933	0.665915	0.911131
13.6157	0.855175	0.656535	1.11391
13.5582	0.85483	0.657076	1.1121
13.2461	0.852794	0.65997	1.10196
12.6301	0.84789	0.66539	1.08045
13.1694	0.85225	0.660668	1.09939
13.8484	0.856478	0.654324	1.12109
2.49151	0.979599	0.825639	1.16227
13.5555	0.854813	0.657102	1.11201
13.8785	0.856636	0.654035	1.122
7.63334	0.752973	0.634971	0.892904
13.6677	0.855479	0.656044	1.11554
11.4582	0.834563	0.673753	1.03375
6.49436	0.748325	0.612882	0.913701
13.5746	0.854929	0.656922	1.11262
13.2433	0.852775	0.659995	1.10187
13.6513	0.855383	0.656199	1.11503
2.35462	0.997688	0.837699	1.18823
13.1393	0.852032	0.66094	1.09837
13.1941	0.852427	0.660444	1.10022
11.4144	0.833941	0.673986	1.03186
7.22265	0.749367	0.625324	0.898015
13.0517	0.85138	0.661728	1.09539
5.92213	0.753017	0.610325	0.92907
13.4213	0.853972	0.658355	1.10771
13.9251	0.856876	0.653588	1.12339
13.5965	0.855061	0.656716	1.11331
10.6752	0.821717	0.67646	0.998166
6.00701	0.751978	0.610192	0.926709
13.6869	0.855589	0.655862	1.11614
13.8074	0.856258	0.654716	1.11984
13.4733	0.854304	0.657871	1.10939
12.2988	0.844706	0.668079	1.06803
13.0051	0.851023	0.662143	1.09378
12.2331	0.844025	0.668589	1.0655
13.6732	0.85551	0.655992	1.11571
13.0791	0.851586	0.661483	1.09632
13.4788	0.854339	0.65782	1.10957
13.2297	0.852679	0.66012	1.10141
4.95838	0.775455	0.628603	0.956614
5.74964	0.755531	0.611219	0.933914
13.0216	0.85115	0.661997	1.09435
6.93517	0.748097	0.619473	0.903428
13.153	0.852131	0.660816	1.09883
13.0572	0.851421	0.661679	1.09557
13.5692	0.854896	0.656973	1.11245
2.91863	0.928642	0.788017	1.09436
13.1503	0.852112	0.660841	1.09874
13.9196	0.856848	0.653641	1.12323
13.9525	0.857014	0.653325	1.12421
7.04468	0.748454	0.621584	0.901221
8.77231	0.775812	0.663604	0.906995
13.843	0.856449	0.654376	1.12092
13.1886	0.852388	0.660494	1.10003
0.837805	1.29794	1.01043	1.66726
11.7731	0.838745	0.671868	1.04707
6.64495	0.747938	0.614751	0.90998
13.9333	0.856917	0.653509	1.12364
13.769	0.856049	0.655082	1.11867
4.76399	0.783551	0.637721	0.962729
13.8594	0.856535	0.654219	1.12142
13.1119	0.85183	0.661187	1.09744
12.5452	0.847113	0.666097	1.07732
13.8457	0.856463	0.65435	1.121
7.0173	0.74835	0.621041	0.901757
8.06867	0.759164	0.645865	0.892337
6.04534	0.75155	0.610196	0.925649
13.2817	0.853041	0.659644	1.10314
12.0852	0.842427	0.6697	1.0597
11.6334	0.836951	0.672746	1.04124
2.39021	0.992897	0.834559	1.18128
13.7307	0.855837	0.655446	1.11749
13.498	0.854459	0.657641	1.11018
9.40477	0.793132	0.673146	0.934505
13.3282	0.853358	0.659216	1.10467
13.2926	0.853116	0.659543	1.1035
12.8546	0.849822	0.663469	1.08852
13.9634	0.857069	0.65322	1.12453
6.45055	0.748501	0.612422	0.914816
0.922681	1.27291	0.996527	1.62594
11.4527	0.834486	0.673782	1.03352
11.2255	0.831137	0.674898	1.02354
13.7416	0.855898	0.655342	1.11783
1.26218	1.18691	0.948057	1.48595
11.001	0.827532	0.675757	1.0134
13.0325	0.851234	0.661899	1.09473
10.6779	0.821769	0.676457	0.998296
10.6998	0.822183	0.676433	0.999338
1.78787	1.08382	0.889774	1.32019
13.9607	0.857055	0.653246	1.12445
0.112255	1.64091	0.951076	2.83109
13.55	0.85478	0.657153	1.11184
8.8435	0.777846	0.665143	0.909645
13.0188	0.851129	0.662021	1.09426
13.2652	0.852928	0.659794	1.10259
10.3932	0.816144	0.676622	0.984436
7.97832	0.757614	0.64353	0.891922
13.1065	0.85179	0.661236	1.09726
8.04676	0.758774	0.645296	0.892208
2.382	0.993997	0.835284	1.18287
13.9771	0.857137	0.653088	1.12494
6.98992	0.748256	0.620508	0.902304
1.35254	1.16703	0.936855	1.45376
5.82083	0.754427	0.610746	0.931909
3.31289	0.888667	0.753669	1.04785
7.45537	0.751159	0.630666	0.894674
8.52864	0.769221	0.657799	0.899515
8.47114	0.767783	0.656352	0.898131
4.44365	0.800813	0.658401	0.974029
9.50334	0.795663	0.67395	0.939356
13.6924	0.85562	0.65581	1.11631
13.3693	0.853632	0.658837	1.10602
6.0207	0.751822	0.610189	0.92633
10.656	0.821353	0.67648	0.997251
0.208082	1.57235	1.05572	2.34179
13.7909	0.856169	0.654873	1.11934
13.7663	0.856034	0.655108	1.11859
11.6581	0.837275	0.672596	1.04227
13.1475	0.852092	0.660866	1.09865
9.48691	0.795244	0.673826	0.938541
9.86748	0.80457	0.675857	0.957795
13.7061	0.855698	0.65568	1.11673
3.14314	0.905135	0.768428	1.06616
13.5719	0.854913	0.656948	1.11253
13.7499	0.855944	0.655264	1.11808
13.9032	0.856763	0.653799	1.12274
9.01051	0.782539	0.668239	0.916391
12.6328	0.847915	0.665367	1.08055
8.03307	0.758535	0.644941	0.892137
13.728	0.855821	0.655472	1.11741
8.79148	0.776361	0.664032	0.907694
8.39174	0.765877	0.654319	0.896455
12.474	0.846441	0.666681	1.07467
13.7115	0.855729	0.655628	1.1169
2.89673	0.93105	0.789934	1.09737
13.3063	0.853209	0.659418	1.10395
3.43062	0.877842	0.74346	1.03651
13.2707	0.852965	0.659744	1.10278
6.4615	0.748454	0.612534	0.914536
3.28277	0.891512	0.756284	1.05092
13.2899	0.853097	0.659569	1.10341
5.83178	0.754265	0.610686	0.931601
10.8066	0.824151	0.676263	1.00438
13.8977	0.856735	0.653851	1.12257
13.2516	0.852833	0.65992	1.10214
9.2405	0.788807	0.671462	0.92666
13.8019	0.856229	0.654768	1.11967
13.8566	0.856521	0.654245	1.12134
2.98708	0.921253	0.782034	1.08526
13.5144	0.854561	0.657487	1.11071
8.87636	0.778778	0.665807	0.910916
13.0626	0.851462	0.66163	1.09576
13.32	0.853302	0.659292	1.1044
6.61209	0.747994	0.614307	0.910776
8.81612	0.777066	0.664567	0.908608
3.7756	0.848625	0.713766	1.00897
13.3474	0.853486	0.659039	1.1053
0.240937	1.5514	1.06998	2.24944
13.2351	0.852718	0.66007	1.10159
12.6273	0.847865	0.665413	1.08035
6.25068	0.749676	0.610845	0.920059
13.205	0.852505	0.660344	1.10058
13.7882	0.856154	0.654899	1.11926
13.3939	0.853794	0.658609	1.10682
10.9353	0.826418	0.675955	1.01037
11.2748	0.831888	0.674676	1.02573
1.87274	1.06957	0.881546	1.29769
9.64024	0.799094	0.674845	0.946219
3.27456	0.892294	0.756998	1.05177
13.4076	0.853883	0.658482	1.10727
13.7636	0.856019	0.655134	1.1185
8.71482	0.774188	0.66229	0.904992
2.76257	0.946277	0.801714	1.11691
13.8293	0.856376	0.654507	1.12051
13.7444	0.855913	0.655316	1.11791
3.14861	0.904587	0.767951	1.06553
13.9716	0.85711	0.653141	1.12478
4.40258	0.803422	0.661603	0.975641
13.5089	0.854527	0.657538	1.11053
13.1667	0.852231	0.660692	1.0993
13.8758	0.856622	0.654061	1.12191
13.4761	0.854322	0.657845	1.10948
10.9846	0.827256	0.675809	1.01264
1.30051	1.17835	0.943229	1.47208
6.51079	0.748267	0.613065	0.913286
8.55054	0.769781	0.658344	0.90008
7.34038	0.75019	0.627974	0.896192
2.55448	0.97157	0.820094	1.15103
4.99671	0.774047	0.627083	0.955453
13.5527	0.854797	0.657128	1.11193
1.12529	1.21923	0.966293	1.53837
13.3036	0.853191	0.659443	1.10386
2.17391	1.02302	0.853758	1.22585
10.3548	0.815352	0.67662	0.98253
10.771	0.823504	0.676329	1.00271
11.3925	0.833626	0.6741	1.0309
13.09	0.851668	0.661384	1.0967
3.89333	0.839423	0.703751	1.00125
10.5054	0.818415	0.676592	0.989967
8.92016	0.780014	0.66665	0.912655
7.96463	0.757392	0.64318	0.891886
13.2324	0.852699	0.660095	1.1015
5.07338	0.771406	0.624305	0.953167
9.23502	0.788661	0.671397	0.926405
13.4952	0.854442	0.657666	1.11009
13.3775	0.853686	0.658761	1.10629
13.6759	0.855526	0.655966	1.1158
8.50947	0.768736	0.65732	0.899038
13.4186	0.853954	0.65838	1.10762
10.667	0.821561	0.676469	0.997774
13.3501	0.853504	0.659014	1.10539
13.4158	0.853936	0.658406	1.10753
5.13087	0.769572	0.622441	0.951483
1.89738	1.06553	0.879197	1.29136
0.262841	1.53809	1.07616	2.1983
0.961012	1.26214	0.990489	1.60828
12.9504	0.850595	0.662628	1.09188
7.61417	0.752759	0.634502	0.893058
13.4651	0.854252	0.657947	1.10913
7.50192	0.751597	0.631778	0.89414
13.424	0.85399	0.65833	1.1078
11.1434	0.829854	0.675243	1.01987
11.9839	0.841279	0.670432	1.05566
3.8769	0.840685	0.705144	1.00228
13.7088	0.855713	0.655654	1.11682
8.25485	0.76282	0.650749	0.894192
13.2872	0.853079	0.659594	1.10332
13.4624	0.854235	0.657973	1.10904
13.4569	0.8542	0.658024	1.10886
5.67572	0.756779	0.611873	0.936002
0.640675	1.36368	1.04495	1.77962
6.6203	0.747979	0.614416	0.910576
3.6387	0.859799	0.725498	1.01896
13.4596	0.854218	0.657998	1.10895
6.42865	0.7486	0.612207	0.915379
2.53806	0.973648	0.821541	1.15392
7.00361	0.748302	0.620774	0.902029
13.8676	0.856579	0.65414	1.12167
13.9141	0.85682	0.653694	1.12306
8.57518	0.770419	0.658952	0.900741
6.43686	0.748562	0.612287	0.915167
9.20217	0.787779	0.670999	0.924883
11.3624	0.833189	0.674253	1.02959
12.7669	0.849089	0.664227	1.0854
6.37663	0.748863	0.611737	0.916727
12.7533	0.848972	0.664344	1.08491
12.5561	0.847215	0.666006	1.07773
9.9989	0.807607	0.676223	0.964519
5.35538	0.763467	0.616756	0.945078
12.192	0.84359	0.668902	1.0639
0.81864	1.30384	1.01367	1.67708
10.7956	0.823953	0.676285	1.00387
4.25474	0.813285	0.673604	0.981932
5.76607	0.755267	0.611097	0.933451
8.6272	0.771793	0.660218	0.902223
3.57299	0.865354	0.731156	1.02418
5.63465	0.757518	0.612309	0.937164
12.86	0.849867	0.663421	1.08871
11.6444	0.837095	0.67268	1.0417
4.4108	0.802893	0.660952	0.975315
12.7122	0.848617	0.664695	1.08343
3.51276	0.87056	0.736355	1.02922
11.4692	0.834717	0.673693	1.03423
9.88391	0.804955	0.675911	0.958635
0.0848757	1.66225	0.886939	3.11528
11.68	0.837559	0.672461	1.04319
11.0229	0.827898	0.675685	1.0144
11.7183	0.838053	0.67222	1.04479
11.6389	0.837023	0.672713	1.04147
7.5293	0.751867	0.632438	0.893848
12.6684	0.848232	0.665067	1.08184
12.7149	0.848641	0.664672	1.08353
11.2556	0.831597	0.674764	1.02488
12.9257	0.850399	0.662845	1.09102
11.5486	0.835814	0.673248	1.03763
7.68536	0.753574	0.636249	0.892533
11.6417	0.837059	0.672697	1.04158
11.1379	0.829767	0.675265	1.01962
10.6587	0.821405	0.676477	0.997382
12.2933	0.84465	0.668122	1.06782
7.71	0.753869	0.636855	0.892383
8.70113	0.773807	0.661971	0.904537
12.1728	0.843385	0.669047	1.06315
8.46293	0.767581	0.656144	0.897945
4.06582	0.82657	0.689236	0.991268
11.2529	0.831556	0.674776	1.02476
12.1153	0.84276	0.669478	1.06089
4.64626	0.789291	0.644463	0.966664
10.3302	0.814839	0.676615	0.9813
2.51615	0.976436	0.82347	1.15782
3.87143	0.841108	0.705608	1.00263
0.733764	1.33116	1.02837	1.72309
10.1687	0.811389	0.676506	0.973166
8.80243	0.776675	0.664272	0.908098
12.9449	0.850552	0.662676	1.09169
10.322	0.814667	0.676613	0.980889
11.2392	0.831347	0.674838	1.02415
11.6362	0.836987	0.67273	1.04135
9.1611	0.78667	0.670472	0.923006
3.37312	0.88307	0.748443	1.04191
12.2495	0.844197	0.668462	1.06613
8.17271	0.761133	0.64859	0.893204
10.9681	0.826978	0.675859	1.01189
11.2885	0.832094	0.674612	1.02634
1.07327	1.23228	0.973667	1.55959
4.33414	0.807931	0.667129	0.978451
10.719	0.822542	0.676409	1.00025
12.0031	0.8415	0.670296	1.05643
10.196	0.811984	0.676535	0.974552
11.1844	0.8305	0.675075	1.02171
11.7512	0.838469	0.67201	1.04616
8.48483	0.768121	0.656699	0.898448
12.3864	0.845589	0.667387	1.07137
5.11992	0.769912	0.622782	0.951802
4.50389	0.797158	0.653938	0.971744
12.7861	0.849252	0.664062	1.08609
1.44836	1.14705	0.925604	1.42147
8.98587	0.781854	0.667825	0.915353
6.53543	0.748187	0.613349	0.912668
8.61078	0.771355	0.659821	0.901742
11.3569	0.833109	0.67428	1.02935
1.33611	1.17057	0.938847	1.45948
12.1372	0.843	0.669315	1.06176
9.41299	0.793345	0.673219	0.934906
9.43489	0.793911	0.673407	0.935977
3.45526	0.875635	0.741327	1.03428
10.1632	0.81127	0.6765	0.972888
4.56138	0.793853	0.649933	0.969644
4.8872	0.77823	0.631662	0.958806
1.96583	1.05454	0.872756	1.2742
8.40817	0.766264	0.654742	0.89678
11.8853	0.840119	0.671119	1.05168
3.62501	0.860946	0.726676	1.02003
10.6067	0.820405	0.676525	0.994885
7.70452	0.753803	0.636721	0.892415
12.6574	0.848135	0.66516	1.08144
11.0859	0.828931	0.675464	1.01727
11.1078	0.829285	0.675382	1.01826
7.53203	0.751894	0.632504	0.89382
11.064	0.828575	0.675543	1.01627
3.01446	0.918354	0.779644	1.08174
3.54835	0.86747	0.733282	1.02621
10.7135	0.82244	0.676416	0.999988
6.49984	0.748305	0.612943	0.913562
2.10546	1.0331	0.859929	1.24114
10.029	0.80829	0.676288	0.966058
10.5684	0.819659	0.676555	0.993033
12.4685	0.846389	0.666725	1.07447
3.30468	0.889439	0.754382	1.04868
12.0934	0.842518	0.66964	1.06003
10.886	0.825563	0.676086	1.00809
10.3494	0.815238	0.676619	0.982257
1.70573	1.09816	0.897971	1.34297
11.4883	0.834985	0.673588	1.03505
12.1016	0.842609	0.669579	1.06035
4.1726	0.818964	0.680363	0.985801
9.41025	0.793274	0.673195	0.934772
11.4062	0.833823	0.674029	1.0315
11.4445	0.83437	0.673827	1.03316
12.9038	0.850224	0.663038	1.09025
10.2973	0.814149	0.676604	0.979655
6.23973	0.749758	0.610785	0.920353
11.2419	0.831389	0.674826	1.02428
10.7409	0.82295	0.676378	1.00128
12.4028	0.845751	0.667256	1.07199
9.87022	0.804634	0.675866	0.957935
2.56817	0.969848	0.818887	1.14864
12.5205	0.846883	0.6663	1.07641
10.8148	0.824299	0.676247	1.00476
10.5246	0.818796	0.676582	0.990903
11.1653	0.8302	0.675155	1.02085
10.4069	0.816425	0.676621	0.985114
5.34443	0.763735	0.616985	0.945389
10.1413	0.81079	0.676473	0.971777
11.5842	0.836295	0.673041	1.03915
2.08904	1.03556	0.86142	1.24489
11.8634	0.839856	0.671268	1.05078
11.231	0.831221	0.674874	1.02379
12.5068	0.846754	0.666412	1.0759
9.10634	0.78518	0.669716	0.920549
12.9641	0.850703	0.662507	1.09236
10.4151	0.816593	0.67662	0.985521
10.9709	0.827025	0.675851	1.01201
11.3104	0.832421	0.674508	1.0273
2.04797	1.04178	0.865167	1.25444
4.06034	0.826967	0.689693	0.991563
12.6164	0.847766	0.665505	1.07994
7.61143	0.752729	0.634435	0.89308
3.36765	0.883574	0.748917	1.04244
11.8306	0.839456	0.671489	1.04944
[truncated: 3,766 more rows]
